# Supplementary material for: Experimental evaluation of elemental behavior during LA-ICP-MS: influences of plasma conditions and limits of plasma robustness
Source: Royal Society of Chemistry journal article supplement (doi:10.1039/c5ja00253b), 2015-10-20
Supplement: c5ja00253b2.xlsx [file c5ja00253b2.xlsx]

## Sheet: NIST SRM610
file	NAI	Li(7)	Be(9)	B(11)	Ca2+(21.5)	Na(23)	Mg(24)	Al(27)	Si(28)	Si(29)	P(31)	S(33)	S(34)	Cl(35)	K(39)	Ca(43)	Ca(44)	Sc(45)	Ti(49)	V(51)	Cr(52)	Cr(53)	Mn(55)	Fe(56)	Fe(57)	Co(59)	Ni(60)	Ni(61)	Ni(62)	Cu(63)	Cu(65)	Zn(66)	Zn(67)	Ga(71)	Ge(73)	Ge(74)	As(75)	Se(77)	Br(79)	Rb(85)	Sr(88)	Y(89)	Zr(90)	Nb(93)	Mo(95)	Ru(101)	Rh(103)	Pd(105)	Ag(107)
7453	32.2437	1.53109	0.275008	0.102416	0.00203709	616.818	1.59398	53.0973	711.471	31.2252	0.147086	0.00123705	0.00873957	0.0215469	3.11219	1	15.3448	3.84124	0.223939	3.71315	2.56198	0.307213	3.54307	2.94745	0.0677197	2.70966	0.622513	0.0278383	0.093565	1.48987	0.683155	0.21905	0.0327186	1.27504	0.185373	0.87312	0.232072	0.00891633	0.00550701	3.13476	4.79684	5.17656	2.68582	5.00532	0.682678	-0.000118011	0.00884084	0.00139914	0.69198
7454	32.042	1.53066	0.280143	0.0924479	0.00229292	620.129	1.59922	53.3697	724.162	32.5589	0.149068	0.00227214	0.00782092	0.0182027	2.97805	1	15.3971	3.85522	0.223583	3.73145	2.46153	0.288446	3.55518	3.03597	0.068914	2.7036	0.620791	0.0295074	0.0915858	1.58585	0.724197	0.20867	0.0325223	1.26351	0.187299	0.878206	0.200519	0.00918369	0.00481977	3.13835	4.8542	5.29943	2.70557	5.07864	0.661815	0.000159407	0.00774457	0.00161447	0.689786
7452	32.0048	1.54656	0.281743	0.0912083	0.00179747	615.092	1.59521	54.504	711.916	31.5747	0.148113	0.00310437	0.00771607	0.0190392	3.09328	1	15.2567	3.83578	0.224772	3.73489	2.43237	0.284361	3.54097	2.99567	0.0733193	2.68727	0.61841	0.0276956	0.0884954	1.51509	0.704324	0.209657	0.0332109	1.26145	0.183284	0.879169	0.202386	0.00844944	0.00584185	3.12077	4.81841	5.24177	2.66434	5.01929	0.650206	-6.96933e-05	0.00720111	0.00149021	0.676798
7459	31.6998	1.44518	0.26633	0.0791282	0.00203038	627.972	1.52237	53.9179	734.535	30.2801	0.142795	0.00213065	0.00619487	0.0138207	3.05961	1	15.2256	3.77622	0.221318	3.68146	2.30571	0.270597	3.51068	2.99643	0.0711335	2.69128	0.593351	0.0267463	0.0890798	1.53654	0.709598	0.197414	0.0308449	1.2144	0.184864	0.838491	0.158774	0.00655304	0.0052467	3.07903	4.771	5.1136	2.65687	5.01037	0.618847	6.07977e-05	0.00627793	0.00155724	0.660104
7458	31.6993	1.46172	0.268285	0.0834872	0.00219555	635.953	1.53102	55.5719	726.14	29.0045	0.141815	0.000511848	0.00841518	0.0166261	3.03477	1	15.2284	3.76267	0.225991	3.68477	2.34226	0.273877	3.47744	2.91853	0.0708457	2.57508	0.580821	0.0270567	0.0897383	1.50843	0.695057	0.202364	0.0311199	1.19868	0.176414	0.850941	0.161714	0.00772438	0.00548702	3.06174	4.70223	5.08919	2.62793	5.00043	0.629819	0.00024241	0.00596236	0.00158255	0.634983
7457	31.413	1.47137	0.268051	0.0919925	0.00215684	632.263	1.54303	56.0084	733.565	29.2997	0.145324	0.000141266	0.00517238	0.0165908	3.03668	1	15.2013	3.76368	0.217394	3.70658	2.40799	0.274427	3.52231	2.93673	0.0677462	2.6141	0.596347	0.0264111	0.088521	1.48905	0.683051	0.200188	0.0315441	1.22339	0.182398	0.845527	0.187375	0.00742485	0.00612952	3.07302	4.69411	5.09743	2.60989	4.9366	0.646141	0.000119229	0.00827124	0.0015949	0.665636
7456	29.2709	1.51269	0.278169	0.0907833	0.002061	639.413	1.52013	55.352	740.708	29.3369	0.147842	0.00242015	0.0102634	0.0147245	2.97101	1	15.1944	3.8099	0.220319	3.68501	2.39478	0.272786	3.56327	3.21311	0.0766499	2.6097	0.590683	0.026288	0.0865934	1.46911	0.66909	0.198891	0.0331482	1.20943	0.177635	0.844899	0.176811	0.00836606	0.00595413	3.09175	4.73877	5.12898	2.63487	5.01715	0.643755	-0.000128328	0.00815639	0.00152524	0.656114
7455	27.6744	1.48163	0.278365	0.0964252	0.00223671	641.907	1.50915	54.9588	739.504	29.1909	0.148293	0.00196508	0.0102631	0.020797	2.943	1	15.1778	3.79348	0.22038	3.67783	2.49612	0.290975	3.47932	2.89311	0.0725196	2.56469	0.591176	0.0256361	0.0837361	1.42743	0.660876	0.200568	0.0309718	1.20177	0.178759	0.837277	0.212163	0.00878247	0.00602221	3.08099	4.74835	5.11573	2.63099	4.99302	0.673381	8.28398e-05	0.00824304	0.00169298	0.659621
7467	10.923	1.62368	0.239397	0.124372	0.00326151	664.503	1.57151	51.9605	653.835	33.9963	0.196246	0.00283215	0.0180611	0.0203548	3.13939	1	14.8889	3.70786	0.217486	3.62319	2.43283	0.286003	3.3224	2.75902	0.0661546	2.61265	0.586162	0.0272446	0.0876221	1.372	0.624836	0.257668	0.0394693	1.19747	0.181557	0.846734	0.281547	0.0154566	0.00631026	3.18912	4.88855	5.14766	2.66484	4.97832	0.670228	-3.31796e-05	0.00941836	0.00143961	0.651749
7465	10.7732	1.67903	0.243285	0.132355	0.00302346	665.276	1.55513	52.6541	658.785	33.7235	0.200205	0.00223918	0.0175901	0.0245625	3.13319	1	14.8724	3.73575	0.225584	3.67593	2.52897	0.293736	3.34521	2.78449	0.0703785	2.64658	0.600492	0.0282046	0.0903646	1.40016	0.649663	0.268428	0.0402599	1.23379	0.187385	0.87797	0.320934	0.0163876	0.00627103	3.28457	5.00789	5.29164	2.7152	5.11246	0.702089	3.99405e-05	0.0100649	0.00112256	0.67696
7464	10.7328	1.65057	0.24266	0.131886	0.00298838	665.677	1.57424	52.6092	656.723	33.9175	0.200394	0.00255581	0.0189555	0.0217797	3.13672	1	14.9515	3.7281	0.220696	3.65371	2.58685	0.303416	3.39299	2.75757	0.0691784	2.64864	0.603975	0.0287619	0.0889419	1.37239	0.6526	0.259187	0.0385884	1.21643	0.18552	0.872893	0.325217	0.016113	0.00735668	3.25861	4.98398	5.24663	2.6876	5.05672	0.703011	-1.10205e-05	0.00929751	0.00142953	0.671919
7463	10.6944	1.66044	0.245998	0.129522	0.00290564	663.304	1.5765	52.7259	667.294	34.7957	0.198972	0.00305796	0.0160713	0.0201816	3.15969	1	15.0086	3.71668	0.219899	3.679	2.5736	0.30007	3.41749	2.84121	0.0675011	2.66475	0.60294	0.0280141	0.0882672	1.37906	0.656423	0.260523	0.0388694	1.22331	0.183397	0.872749	0.310565	0.0144848	0.00661432	3.21928	4.99154	5.25914	2.70589	5.10619	0.704996	-4.37734e-05	0.00877248	0.00116724	0.669736
7466	10.6665	1.66353	0.240641	0.12634	0.00323051	660.125	1.55769	52.5326	660.289	33.9394	0.193379	0.00260568	0.0166307	0.0211756	3.09495	1	14.9346	3.72849	0.216128	3.66439	2.48038	0.286344	3.38276	2.81043	0.0688353	2.62976	0.599783	0.0286338	0.0898322	1.40343	0.647207	0.264704	0.03943	1.2316	0.182511	0.865983	0.289387	0.0150173	0.00661388	3.24375	4.98791	5.29431	2.70627	5.07484	0.692256	-6.81691e-07	0.00957721	0.0012123	0.668465
7462	10.3326	1.61641	0.238373	0.129186	0.00297787	661.25	1.52554	51.2488	649.702	29.2065	0.195576	0.00357039	0.0158665	0.0206484	3.12598	1	14.9451	3.64656	0.219659	3.67462	2.49333	0.292925	3.36647	3.08521	0.0753253	2.5833	0.581452	0.0264382	0.0849285	1.30521	0.605136	0.257372	0.0401362	1.19452	0.186639	0.863573	0.313561	0.0159442	0.00626699	3.32378	5.01339	5.2683	2.68482	5.13702	0.704309	-3.29829e-05	0.0108103	0.00136476	0.671727
7461	10.2107	1.63776	0.241606	0.0949164	0.00298234	666.788	1.54015	50.5479	652.628	28.4689	0.194898	0.000823057	0.0124891	0.0150204	3.12438	1	15.0139	3.68991	0.216971	3.70527	2.20106	0.252964	3.38288	2.87085	0.0667013	2.62863	0.582144	0.0263674	0.0848752	1.50225	0.694602	0.260261	0.0399473	1.19956	0.187497	0.856119	0.213147	0.0114238	0.00785798	3.33166	5.08651	5.42237	2.76104	5.19431	0.63928	3.81134e-05	0.00916979	0.00174838	0.679436
7460	10.1928	1.63736	0.2408	0.115062	0.00306749	661.117	1.54524	50.8732	652.92	26.1891	0.19733	0.00200247	0.0155657	0.0172472	3.10474	1	15.1264	3.69934	0.22114	3.70314	2.38029	0.273527	3.35993	2.76191	0.0669616	2.60929	0.582452	0.0265444	0.0852583	1.43612	0.671391	0.265967	0.0411751	1.19274	0.182651	0.861112	0.276503	0.0136522	0.00580194	3.29948	5.14582	5.41759	2.74767	5.21533	0.675512	-5.42149e-05	0.00833743	0.0014151	0.685457
7475	7.07763	1.76306	0.295565	0.174349	0.00332397	674.958	1.6545	53.1055	729.182	38.2393	0.246816	0.00421086	0.0211537	0.0214514	3.22851	1	15.0174	3.71725	0.219361	3.66804	2.49592	0.299366	3.42729	2.84722	0.0711277	2.74851	0.632645	0.0280039	0.0933499	1.42548	0.677916	0.332049	0.0479636	1.26946	0.197947	0.903354	0.358598	0.0190324	0.00674696	3.30118	4.98628	5.24247	2.67985	5.01541	0.679437	4.19438e-05	0.00929273	0.00146257	0.790761
7474	6.94032	1.76265	0.299398	0.181074	0.00373337	680.594	1.65474	51.8101	734.329	38.3255	0.249025	0.00462365	0.0234916	0.0217331	3.16875	1	14.9499	3.6695	0.217554	3.63581	2.55418	0.300478	3.39349	2.77892	0.0713963	2.71642	0.624432	0.0272499	0.0921007	1.44758	0.67605	0.334967	0.0481834	1.25132	0.191095	0.907581	0.408715	0.0201264	0.00803277	3.28053	5.0212	5.20112	2.64898	4.98245	0.69746	1.90907e-05	0.00948728	0.00184515	0.789793
7473	6.55671	1.80066	0.312784	0.182901	0.00362765	682.575	1.64481	52.1661	755.36	40.4527	0.243691	0.00277656	0.0221656	0.019484	3.17502	1	14.9502	3.72245	0.220664	3.68144	2.52322	0.301388	3.46277	2.80218	0.0728128	2.72669	0.62525	0.0280989	0.0911244	1.49539	0.700275	0.339356	0.046888	1.26331	0.194009	0.907538	0.368194	0.0171088	0.00706758	3.32746	5.05472	5.29235	2.70485	5.09096	0.698025	4.95618e-05	0.00897958	0.00149074	0.793932
7472	6.3102	1.78057	0.307491	0.187773	0.00382718	667.933	1.5988	52.3654	752.854	39.8491	0.24102	0.00401942	0.0260906	0.0196319	3.104	1	14.8852	3.64967	0.218849	3.59221	2.51873	0.29427	3.38575	2.77456	0.0695387	2.67846	0.611719	0.0259384	0.0897657	1.43542	0.682361	0.338776	0.0501372	1.23197	0.189804	0.889261	0.374518	0.0185072	0.00783217	3.26093	5.02944	5.20916	2.68334	5.03811	0.698521	1.28698e-05	0.00913047	0.00162399	0.795938
7468	4.34713	1.77191	0.316055	0.181937	0.00490403	688.626	1.53788	48.4766	747.136	37.2466	0.287297	0.00319926	0.0190853	0.016689	3.17905	1	14.6361	3.53318	0.212835	3.60793	2.12963	0.243456	3.21039	2.68435	0.0670917	2.53409	0.577438	0.0251621	0.0831669	1.39256	0.644205	0.386026	0.0570141	1.20439	0.186763	0.88257	0.345001	0.0203877	0.00865267	3.28571	4.99457	5.00811	2.54855	4.84078	0.612039	8.68318e-06	0.00879673	0.00183501	0.826102
7471	4.33114	1.77898	0.316111	0.212017	0.00513777	686.867	1.52091	48.3929	742.439	39.069	0.286735	0.00348075	0.0234156	0.0195186	3.18225	1	14.7976	3.56032	0.217951	3.59751	2.32513	0.272226	3.21504	2.64928	0.0657299	2.58325	0.574786	0.0258514	0.0852171	1.32893	0.627571	0.376823	0.0569632	1.20387	0.191763	0.882572	0.438378	0.0226891	0.00771089	3.28026	4.96468	5.06972	2.54436	4.85957	0.657806	2.55606e-05	0.00908584	0.00172904	0.82628
7469	4.30732	1.81284	0.322591	0.205687	0.00490328	688.622	1.54738	49.5925	752.91	37.9377	0.288938	0.00248328	0.0238255	0.0208374	3.20901	1	14.8381	3.5865	0.216707	3.60674	2.24555	0.257699	3.23375	2.66445	0.0670314	2.56653	0.580001	0.0261632	0.0834463	1.33582	0.621579	0.384669	0.0569974	1.205	0.191081	0.877498	0.402149	0.0226854	0.0080266	3.30308	5.03334	5.12168	2.593	4.9116	0.639621	-1.29197e-05	0.00903595	0.0020688	0.839007
7470	4.30318	1.77755	0.315623	0.232454	0.00446744	682.862	1.51153	49.5519	739.103	38.1691	0.289132	0.00345998	0.0255176	0.0218615	3.17432	1	14.7153	3.52704	0.217469	3.59124	2.41497	0.277826	3.2107	2.62135	0.0677692	2.55772	0.576348	0.0260791	0.0809553	1.2206	0.57606	0.387288	0.0557108	1.18578	0.191135	0.88376	0.473889	0.0251873	0.00777172	3.26049	4.99396	5.04557	2.53917	4.8779	0.674566	-2.60389e-05	0.0105728	0.00153108	0.833614
7481	2.90918	1.83596	0.373079	0.314323	0.0074011	700.018	1.59192	46.8932	789.586	42.2331	0.348521	0.00574748	0.0319164	0.0268335	3.26831	1	14.8034	3.38521	0.214422	3.53052	2.36614	0.28509	3.26949	2.71536	0.0671711	2.62915	0.597826	0.0270538	0.0845672	1.21203	0.588481	0.446154	0.0631292	1.28899	0.203357	0.956787	0.604963	0.0358975	0.00871198	3.33934	5.0256	4.77134	2.37988	4.72484	0.665324	1.43808e-05	0.012255	0.00241684	0.966617
7483	2.86508	1.89956	0.380467	0.319954	0.00731297	705.006	1.61745	47.3678	797.258	41.5051	0.344512	0.00506287	0.0355045	0.027305	3.22659	1	14.8992	3.40698	0.213537	3.5251	2.39074	0.280242	3.26221	2.68815	0.0679964	2.66147	0.614359	0.0270371	0.0894374	1.26846	0.587264	0.465917	0.0691171	1.29912	0.20803	0.958352	0.631576	0.0382418	0.00914807	3.35786	5.05026	4.84803	2.43878	4.81389	0.673556	-3.23829e-05	0.0134975	0.0024967	0.968642
7480	2.85965	1.85102	0.381276	0.312717	0.00691969	705.635	1.61844	46.3691	801.055	43.2557	0.345527	0.00636111	0.0321001	0.0257299	3.23196	1	14.8554	3.45162	0.216526	3.54784	2.41517	0.282762	3.2852	2.68252	0.066174	2.64971	0.596436	0.0273659	0.0857957	1.27325	0.597734	0.462141	0.0674074	1.30415	0.204447	0.963343	0.607332	0.0368976	0.00878857	3.34906	5.06608	4.85719	2.45726	4.83095	0.672334	-3.21402e-06	0.0126202	0.00244011	0.976073
7482	2.83456	1.90231	0.385528	0.313134	0.00773889	708.334	1.63021	46.2426	799.462	41.761	0.346848	0.00529562	0.0334305	0.0278871	3.19999	1	14.8203	3.39842	0.211772	3.53087	2.3976	0.280011	3.24866	2.7075	0.0704239	2.63986	0.611752	0.0284946	0.0873355	1.30944	0.614863	0.486583	0.0717173	1.29845	0.208243	0.968146	0.625754	0.0382501	0.00949831	3.36505	5.03073	4.7951	2.40816	4.78958	0.673994	7.41472e-06	0.0129321	0.00234714	0.972958
7479	2.7318	1.87439	0.396571	0.314185	0.00748964	711.622	1.58313	47.6861	818.708	43.15	0.343494	0.00480555	0.0347467	0.0258929	3.24795	1	14.8029	3.40246	0.216736	3.54271	2.39536	0.276222	3.28481	2.68321	0.0698329	2.65906	0.603658	0.0271829	0.0878539	1.30117	0.601361	0.459888	0.0662574	1.27463	0.203585	0.949243	0.591922	0.0346753	0.00914005	3.37326	5.09929	4.92917	2.46272	4.86278	0.684008	-7.97279e-06	0.012171	0.00255154	0.982514
7478	2.67402	1.89741	0.389972	0.294421	0.00743811	720.838	1.57513	47.9407	818.171	42.9306	0.335574	0.00460322	0.0302648	0.0234664	3.20428	1	14.6715	3.38348	0.211541	3.52704	2.28785	0.270596	3.2759	2.64657	0.0679054	2.61894	0.595012	0.0266548	0.0845515	1.33349	0.635514	0.45614	0.0654268	1.26854	0.201532	0.926069	0.539543	0.0319594	0.00953959	3.40205	5.04473	4.94512	2.45181	4.86476	0.657509	8.93312e-06	0.0108862	0.00262385	0.979621
7477	2.67051	1.87327	0.40022	0.307536	0.00816517	719.513	1.58682	47.692	833.31	44.2227	0.34245	0.0045337	0.0300876	0.0258776	3.2179	1	14.8272	3.45242	0.218043	3.5869	2.36119	0.278718	3.30096	2.73012	0.070157	2.67362	0.61144	0.0260642	0.0881333	1.38517	0.634027	0.461539	0.0691512	1.29914	0.20283	0.95225	0.569832	0.0326876	0.00996427	3.42557	5.09746	4.95094	2.48529	4.9243	0.678569	-2.13739e-05	0.011447	0.00296819	1.01721
7476	2.57736	1.86851	0.394439	0.291879	0.00815949	721.191	1.60173	49.083	836.068	43.8627	0.344124	0.00396537	0.0279911	0.0225261	3.19569	1	14.8053	3.42111	0.212807	3.56798	2.33383	0.270986	3.30261	2.7125	0.0713774	2.64611	0.604913	0.0274395	0.0860254	1.40894	0.67081	0.470533	0.0695264	1.29722	0.206403	0.955361	0.533747	0.0291759	0.00851214	3.41524	5.07697	4.94065	2.4827	4.96122	0.672785	-2.8074e-06	0.0113183	0.00272159	1.0148
7489	0.981046	1.97181	0.47165	0.418681	0.0180004	760.86	1.64753	44.3836	784.362	41.5585	0.413677	0.0064308	0.0443909	0.0257652	3.41855	1	14.3979	2.72222	0.196775	3.54278	2.43287	0.283167	3.45344	2.66391	0.0721357	2.73141	0.641469	0.0280823	0.0913533	1.44599	0.686579	0.581788	0.0841885	1.59895	0.242237	1.08756	0.753861	0.0509815	0.0103357	3.67289	4.96047	3.81139	1.8061	4.08643	0.649398	2.30751e-05	0.012662	0.00358128	1.213
7488	0.963685	1.95678	0.479455	0.429642	0.0178941	773.702	1.68853	43.5734	800.851	41.2827	0.425951	0.00701428	0.0412406	0.0244468	3.44668	1	14.64	2.77365	0.198192	3.63424	2.48155	0.294042	3.50077	2.69825	0.0720709	2.77505	0.649434	0.0303207	0.0925808	1.45447	0.685424	0.599706	0.0933828	1.62068	0.247868	1.1085	0.779192	0.0546671	0.010034	3.75209	5.07092	3.92698	1.85948	4.16649	0.662333	-1.68318e-06	0.0129678	0.00345576	1.25086
7487	0.961354	2.04638	0.491894	0.445367	0.0182375	747.634	1.65752	44.5243	783.206	42.1255	0.414154	0.00796871	0.0380207	0.0277331	3.41908	1	14.5132	2.7318	0.201831	3.49718	2.46883	0.287444	3.45019	2.57528	0.0716959	2.75487	0.640283	0.0279042	0.0910015	1.4126	0.668172	0.577722	0.0879834	1.58137	0.2439	1.08058	0.761013	0.0520462	0.00960325	3.63298	5.03673	3.86704	1.84147	4.09837	0.638899	2.05275e-05	0.0128176	0.00365576	1.22988
7491	0.957221	2.01265	0.479188	0.436435	0.0173545	767.872	1.66967	44.4192	793.287	41.633	0.412763	0.00714936	0.0393685	0.0272922	3.40508	1	14.4991	2.75598	0.198551	3.55287	2.47954	0.295381	3.46453	2.61106	0.0711943	2.74726	0.636017	0.0280795	0.0912384	1.41673	0.655316	0.60747	0.0955361	1.62293	0.245095	1.09567	0.813236	0.0571396	0.0111168	3.73309	5.17802	3.96694	1.90338	4.25065	0.676343	3.71471e-05	0.0146189	0.0039464	1.24833
7490	0.956384	1.99966	0.479755	0.419667	0.0178961	768.51	1.68322	44.2386	793.104	42.2808	0.417006	0.00683413	0.0386695	0.0265347	3.41207	1	14.5119	2.77428	0.196961	3.54422	2.44913	0.283974	3.47311	2.67128	0.0729026	2.73413	0.651808	0.0285916	0.0926327	1.50249	0.692009	0.622005	0.10085	1.61724	0.244834	1.10126	0.789102	0.0552976	0.0121903	3.72556	5.1262	3.92806	1.87705	4.23519	0.667298	4.58997e-05	0.0135296	0.00373718	1.22798
7485	0.955413	2.1565	0.516872	0.469004	0.0193888	804.544	1.68566	45.9439	836.57	43.3365	0.4294	0.00753754	0.0429624	0.0272606	3.44817	1	14.6894	2.77814	0.195861	3.59585	2.50419	0.293188	3.43263	2.64955	0.0710392	2.72389	0.62648	0.0278015	0.0913669	1.461	0.681977	0.62502	0.100883	1.59326	0.245781	1.08727	0.822816	0.0564646	0.0126807	3.78603	5.16132	3.96636	1.89037	4.28104	0.696991	9.0398e-06	0.0136954	0.00349219	1.2702
7486	0.945742	2.06507	0.500064	0.441609	0.019085	765.878	1.68349	43.8277	794.929	41.6669	0.411083	0.0081101	0.0394139	0.0259082	3.3847	1	14.5337	2.72551	0.199113	3.52869	2.48447	0.291045	3.50799	2.62259	0.0735495	2.78658	0.663481	0.0286856	0.0946489	1.49677	0.711289	0.602349	0.096393	1.59487	0.244026	1.08472	0.780001	0.0529777	0.0114975	3.70862	5.02798	3.88276	1.84739	4.16593	0.669475	-2.08795e-06	0.0132752	0.00420422	1.21824
7484	0.940386	2.14509	0.510959	0.462357	0.0184758	801.921	1.7139	45.6305	829.809	43.9301	0.430283	0.00865777	0.0428846	0.029044	3.38728	1	14.6145	2.77404	0.19787	3.5703	2.49013	0.286922	3.45762	2.58818	0.0695046	2.69592	0.625002	0.0279143	0.0903838	1.46486	0.681155	0.621258	0.100059	1.56004	0.247402	1.07665	0.809009	0.0586095	0.00997182	3.74307	5.18003	3.97903	1.91183	4.26757	0.681051	2.76377e-05	0.0130643	0.00374299	1.26359
7492	0.536173	2.68253	0.612761	0.58479	0.0225562	925.736	1.91055	46.4892	845.368	44.2851	0.514505	0.00904044	0.0498173	0.0296667	3.92	1	14.8556	2.53393	0.187971	3.74659	2.75843	0.325512	3.8348	2.69948	0.0819338	3.01472	0.724311	0.0327073	0.104358	1.76642	0.812998	0.762753	0.120116	1.95395	0.29161	1.27309	0.950273	0.0724167	0.0134078	4.06802	4.93314	3.3836	1.58272	3.75429	0.687939	1.88441e-05	0.0153192	0.00448328	1.39026
7496	0.53579	2.62383	0.594616	0.538189	0.0230237	924.31	1.89156	46.8769	834.653	44.0983	0.519378	0.00662438	0.0466292	0.0271392	3.94783	1	14.9745	2.55161	0.19002	3.86734	2.78273	0.322729	3.87194	2.98744	0.0838405	3.07486	0.736835	0.0343609	0.10371	1.84609	0.853959	0.754066	0.118839	1.94911	0.299322	1.28088	0.898923	0.0634158	0.0136035	4.2373	5.05589	3.44012	1.58708	3.79978	0.686978	3.20486e-05	0.0137837	0.00440565	1.43124
7495	0.534686	2.59982	0.591714	0.546491	0.0224838	911.618	1.85905	45.841	819.593	43.3876	0.508073	0.00632415	0.0465798	0.0245066	3.89469	1	14.7233	2.5264	0.190693	3.76751	2.72836	0.317865	3.82244	2.75091	0.0772226	3.0009	0.712922	0.0317802	0.104257	1.77641	0.83567	0.742765	0.12049	1.89448	0.297229	1.26149	0.877408	0.0651796	0.0141335	4.10914	4.99353	3.42201	1.59216	3.76433	0.675278	-5.54652e-05	0.0132814	0.00445889	1.39433
7493	0.534599	2.66832	0.608014	0.566333	0.0216316	935.743	1.91838	45.9013	841.645	44.3224	0.514373	0.00690144	0.0486428	0.0264161	3.9151	1	14.8959	2.55454	0.192285	3.85515	2.78667	0.320829	3.86537	2.78441	0.08257	3.07858	0.722538	0.0339754	0.107069	1.82321	0.849174	0.74683	0.124748	1.93081	0.295115	1.26612	0.919032	0.0659278	0.0140259	4.12681	4.99136	3.41695	1.58268	3.78969	0.68881	3.67411e-05	0.0139136	0.0045425	1.38435
7494	0.531505	2.64244	0.599512	0.567242	0.0213404	925.576	1.89166	45.9684	831.174	44.3567	0.507867	0.00541099	0.0473521	0.0289285	3.94951	1	14.9062	2.55794	0.194611	3.81477	2.76338	0.321976	3.88426	2.83099	0.0815401	3.04474	0.725734	0.0322585	0.103475	1.77572	0.82178	0.749851	0.120329	1.95056	0.297866	1.26202	0.914544	0.066734	0.0144219	4.13555	5.0074	3.44367	1.59231	3.77977	0.685464	1.62261e-05	0.0132839	0.00467103	1.40475
7497	0.525516	2.58284	0.58751	0.542241	0.0221922	921.591	1.89023	46.038	827.673	44.3604	0.505582	0.00844296	0.0402514	0.0265205	3.92918	1	14.816	2.52246	0.189963	3.80369	2.73659	0.319759	3.87281	2.88718	0.080062	3.04502	0.718994	0.0326126	0.103119	1.75137	0.815516	0.742582	0.119472	1.90659	0.294915	1.26564	0.862941	0.0620302	0.0147732	4.12919	4.9827	3.41505	1.59142	3.77236	0.685761	-2.68645e-06	0.0133742	0.00454518	1.39334
7498	0.512594	2.58714	0.590746	0.54422	0.0238591	910.657	1.87862	47.0312	829.174	44.1442	0.503699	0.00796205	0.0458314	0.0288614	3.90769	1	14.8835	2.54212	0.192415	3.80785	2.77536	0.315366	3.85777	2.91554	0.0831025	3.03961	0.720023	0.0315363	0.10286	1.74126	0.797415	0.74488	0.117772	1.9314	0.300424	1.25468	0.892373	0.068347	0.0142317	4.11086	5.02089	3.44328	1.59408	3.80005	0.683355	5.5264e-05	0.0138772	0.00437897	1.42655
7504	0.369812	2.73015	0.59108	0.670451	0.0241402	1043.74	2.06437	46.9824	819.98	43.7968	0.611712	0.00224682	0.0695818	-2.21391e-05	4.49797	1	14.9942	2.4247	0.193165	4.16597	3.31458	0.384738	4.24586	2.91721	0.0904038	3.33392	0.820403	0.0372872	0.117012	1.95742	0.917694	0.848987	0.105653	2.17157	0.333767	1.38517	1.10522	0.0848064	0.0158093	4.32762	4.5795	2.93282	1.31697	3.26387	0.68662	6.61896e-05	0.0148946	0.00594611	1.47356
7502	0.363349	2.94749	0.660319	0.751979	0.0245884	1101.45	2.21204	49.9223	860.934	44.6899	0.634533	0.00217308	0.0514517	0.0343464	4.45255	1	15.0472	2.47346	0.195143	4.12996	3.34981	0.387845	4.26781	3.07907	0.0913508	3.36903	0.832682	0.0376744	0.118124	1.96755	0.913397	0.886503	0.141127	2.1917	0.337971	1.44111	1.18495	0.0914416	0.0154822	4.38428	4.64419	3.0114	1.36349	3.33598	0.708563	1.75836e-05	0.0165344	0.00525938	1.52527
7503	0.363052	2.88354	0.627229	0.697762	0.0253002	1080.39	2.15123	50.6368	850.376	43.6603	0.632083	0.00869215	0.0633277	0.0326598	4.50194	1	15.1984	2.4655	0.192529	4.19613	3.3524	0.393289	4.3139	3.02507	0.0917695	3.43417	0.835568	0.0363399	0.120441	2.06537	0.968337	0.869618	0.14051	2.23064	0.335076	1.4406	1.12131	0.0843147	0.016845	4.44089	4.65432	2.97865	1.34264	3.34583	0.705446	2.96768e-05	0.0149695	0.00595311	1.52182
7501	0.36027	2.85756	0.643329	0.747305	0.0245054	1085.72	2.19494	50.2213	846.78	44.2814	0.630615	0.00743044	0.062711	0.0299363	4.40882	1	15.2155	2.45316	0.189543	4.15991	3.41867	0.397293	4.29455	2.97567	0.0922196	3.43346	0.836576	0.0391042	0.118127	1.93585	0.911914	0.864933	0.134221	2.20978	0.33529	1.42316	1.1568	0.0897055	0.0156534	4.42589	4.62806	2.9388	1.3286	3.29122	0.705988	7.54802e-06	0.0162645	0.0053776	1.5054
7500	0.355175	3.05555	0.67415	0.737442	0.0247748	1131.24	2.23748	50.5586	881.215	44.6936	0.645661	0.00646954	0.0632113	0.0294584	4.56826	1	15.0602	2.44096	0.188571	4.14558	3.36723	0.388671	4.30488	2.93082	0.0946791	3.4897	0.85106	0.038842	0.123965	2.14988	0.990753	0.892803	0.140453	2.25069	0.344215	1.42371	1.10733	0.0831061	0.0153903	4.43	4.5809	2.92797	1.33834	3.32396	0.714725	2.4996e-05	0.0157939	0.00633824	1.51174
7499	0.353291	3.23423	0.717131	0.792061	0.0268919	1180.41	2.37125	53.3575	916.074	47.2449	0.667686	0.00481383	0.051292	0.036827	4.62205	1	15.4724	2.48969	0.19234	4.2957	3.47426	0.398259	4.4327	3.19644	0.0970866	3.51199	0.872571	0.0397009	0.127338	2.21127	1.02104	0.930772	0.14918	2.29821	0.353312	1.48049	1.1748	0.0884078	0.016218	4.57389	4.73825	3.01207	1.37967	3.41259	0.733635	1.95296e-05	0.01574	0.00641874	1.58433
7506	0.156518	4.65248	0.905378	1.02161	0.0283129	1542.01	2.67678	57.029	866.722	45.9909	0.791253	-0.130871	0.0799144	0.0361143	4.68658	1	15.582	2.50525	0.18463	4.67294	4.29236	0.514228	4.98149	3.32893	0.128825	4.01918	1.04567	0.0485974	0.150365	2.5127	1.12844	1.11606	0.180924	2.69879	0.384525	1.71077	1.48334	0.10875	0.0141641	5.119	4.33361	2.49195	1.12134	2.87739	0.788708	-1.41746e-05	0.0209566	0.0162229	1.83908
7505	0.155416	4.758	0.921543	1.01623	0.0284249	1526.86	2.70816	58.1106	862.237	44.0926	0.773387	-0.0672957	0.0522416	0.0286825	4.53656	1	15.6074	2.4869	0.175537	4.61137	4.31871	0.496873	4.88962	4.34382	0.130308	3.99069	1.05828	0.0486457	0.14606	2.50398	1.16002	1.14056	0.181581	2.72724	0.396103	1.66446	1.44089	0.103707	0.0135713	5.11722	4.31936	2.50732	1.11461	2.86111	0.7617	9.90406e-05	0.0201431	0.0171145	1.82885
7507	0.153344	4.59323	0.911628	0.970533	0.0284962	1516.56	2.67495	56.9013	852.532	43.1606	0.777324	-0.0212121	0.0518695	0.0317303	4.72209	1	15.5826	2.49468	0.190502	4.69333	4.3141	0.49849	4.98322	3.52493	0.136439	3.97689	1.03086	0.0484488	0.150632	2.58703	1.19486	1.11599	0.170749	2.68895	0.379972	1.66471	1.36983	0.106676	0.0159302	5.11961	4.39384	2.51798	1.10718	2.85949	0.76462	9.51009e-05	0.0211186	0.0164446	1.79889
7513	0.0538571	6.94552	1.04824	0.987195	0.028118	1983.37	3.30182	62.2208	748.462	32.2312	0.780333	-0.0660609	0.0814511	0.0242923	6.87651	1	16.7501	3.18815	0.16033	4.29455	5.08023	0.588206	5.45511	6.40824	0.730487	4.2946	1.24154	0.0880239	0.169319	2.92307	1.34728	1.1913	0.185672	2.86903	0.343863	1.55171	1.36148	0.0911617	-0.00106007	5.38282	3.90213	1.79764	0.790956	2.11484	0.631885	0.000113385	0.0219263	0.102023	1.90366
7510	0.0530555	7.30373	1.09026	0.997753	0.0254943	2065.84	3.43164	66.7276	778.059	32.8755	0.760832	-0.345253	0.00615268	0.0284548	7.25048	1	17.0206	3.36248	0.167916	4.52868	5.37386	0.612884	5.65063	5.33104	0.779196	4.4792	1.28743	0.0950171	0.179532	3.24293	1.49631	1.31382	0.202736	3.10161	0.368576	1.67131	1.43418	0.0984543	0.0144104	5.74162	4.12315	1.87184	0.827636	2.22752	0.677582	9.30105e-05	0.0250257	0.104769	2.08343
7511	0.053023	7.21994	1.08837	0.992237	0.0276424	2032.84	3.41217	66.0173	788.98	33.0234	0.795242	-0.269669	0.0311873	0.0286569	6.04038	1	16.9372	3.31757	0.158476	4.46115	5.2204	0.606254	5.64858	4.5254	0.801349	4.45262	1.27823	0.0934228	0.180779	3.18094	1.42402	1.23762	0.193096	2.93422	0.3603	1.61621	1.40845	0.104677	0.00829768	5.67235	4.10212	1.85372	0.815143	2.16962	0.649351	0.000184575	0.0229784	0.104596	1.97445
7508	0.0240006	9.81394	1.14428	1.06933	0.0295003	2588	4.06916	71.3165	730.204	31.1792	0.791644	0.21193	0.0378917	0.0200378	7.11787	1	17.8737	4.97699	0.140652	4.084	5.67506	0.640735	5.72315	5.98499	3.78216	4.42314	1.3562	0.196215	0.184647	3.52578	1.60248	1.41573	0.234209	3.31196	0.341053	1.61182	1.35936	0.100435	0.0114097	5.71002	3.68587	1.2614	0.559077	1.61707	0.546936	0.000358629	0.0299688	0.227008	2.1286
7509	0.0237506	9.74573	1.15086	1.07494	0.0288025	2562.86	3.96557	66.3488	719.046	29.4754	0.787668	0.70842	-0.0369693	0.0277942	6.86686	1	17.5353	4.7546	0.142495	3.97832	5.69493	0.64098	5.80448	8.93085	3.74129	4.51924	1.36309	0.187913	0.184759	3.53434	1.61293	1.40776	0.224677	3.341	0.356014	1.63456	1.32076	0.0988824	0.0042632	5.70608	3.66826	1.25213	0.560005	1.6261	0.538007	0.000252244	0.0291258	0.223831	2.08826
[truncated: 43 more columns]

## Sheet: NIST SRM612
file	NAI	Li(7)	Be(9)	B(11)	Ca2+(21.5)	Na(23)	Mg(24)	Al(27)	Si(28)	Si(29)	P(31)	S(33)	S(34)	Cl(35)	K(39)	Ca(43)	Ca(44)	Sc(45)	Ti(49)	V(51)	Cr(52)	Cr(53)	Mn(55)	Fe(56)	Fe(57)	Co(59)	Ni(60)	Ni(61)	Ni(62)	Cu(63)	Cu(65)	Zn(66)	Zn(67)	Ga(71)	Ge(73)	Ge(74)	As(75)	Se(77)	Br(79)	Rb(85)	Sr(88)	Y(89)	Zr(90)	Nb(93)	Mo(95)	Ru(101)	Rh(103)	Pd(105)	Ag(107)
7453	32.2437	0.126965	0.022954	0.0119551	0.00227487	619.496	0.201336	52.1207	696.073	31.5617	0.0249573	0.000515898	0.00510453	0.0148664	0.421127	1	15.4696	0.317514	0.0186811	0.310041	0.238539	0.0287716	0.29723	0.313247	0.0103542	0.229495	0.0507168	0.00229267	0.00747685	0.12882	0.0530351	0.01654	0.00345743	0.100188	0.0159565	0.0743262	0.0273168	0.000960015	0.00218476	0.231886	0.729536	0.423161	0.223003	0.404386	0.0636877	-4.25822e-05	0.00876258	0.0013848	0.0661153
7454	32.042	0.13362	0.0230775	0.0123339	0.00221001	607.548	0.199314	53.656	700.823	32.7632	0.0247143	0.00137617	0.00459494	0.0155612	0.375293	1	15.3558	0.313292	0.0191058	0.308439	0.23867	0.0281993	0.290765	0.273181	0.00899226	0.221852	0.0541023	0.0012218	0.00751571	0.130752	0.051203	0.0171132	0.00289986	0.100392	0.0169555	0.0777445	0.0283402	0.0010045	0.000949398	0.225813	0.729439	0.425317	0.220909	0.409443	0.0627833	0.000106788	0.00828263	0.00214664	0.0642704
7452	32.0048	0.127754	0.0236141	0.0114909	0.00198759	603.011	0.200949	53.6031	693.943	29.4276	0.0257988	0.00063358	0.00352797	0.0161948	0.431792	1	15.2018	0.309463	0.0173992	0.304462	0.238173	0.0272644	0.293354	0.297931	0.00818523	0.223203	0.046655	0.00142875	0.00752023	0.122159	0.0529476	0.0153508	0.00410407	0.098593	0.0149862	0.0725609	0.0283983	0.00164992	0.00176998	0.226511	0.705898	0.419757	0.219166	0.402894	0.058746	-1.86295e-05	0.00852785	0.00101098	0.0623161
7459	31.6998	0.122041	0.0224628	0.0127451	0.00170275	621.28	0.195772	53.806	704.183	28.392	0.0233698	0.00134358	0.00683124	0.0145841	0.392575	1	15.0325	0.30972	0.0170466	0.307391	0.233239	0.0263026	0.291145	0.276999	0.00559794	0.213772	0.0445907	0.00232057	0.00764211	0.122648	0.0488991	0.0157214	0.00313012	0.0960222	0.0154893	0.0714632	0.0266425	0.00109536	0.000208167	0.226068	0.698275	0.416844	0.217773	0.38884	0.0612793	0.000204443	0.00791953	0.00178027	0.0589445
7458	31.6993	0.124293	0.0213539	0.0112313	0.00202334	611.495	0.191385	52.4416	700.481	28.4393	0.0241512	-0.00135126	0.00963709	0.0146785	0.417273	1	15.1044	0.309042	0.0180374	0.306091	0.229628	0.0254505	0.286139	0.301502	0.00755769	0.204328	0.0481377	0.00189109	0.00767734	0.114848	0.0483708	0.015679	0.00317607	0.0916965	0.0154121	0.0691113	0.0279192	0.00157629	0.00187652	0.224418	0.693051	0.422489	0.215696	0.392114	0.0610302	4.14599e-06	0.0079134	0.00163585	0.0583661
7457	31.413	0.123894	0.0219301	0.0121145	0.00226676	628.925	0.195519	55.8845	727.305	28.6688	0.0231128	-0.00299722	0.00966087	0.0158927	0.39541	1	15.4962	0.30639	0.017583	0.307099	0.23534	0.0265116	0.289719	0.303481	0.00733826	0.209178	0.0471141	0.00244243	0.00550842	0.123599	0.0500647	0.0155807	0.00287753	0.0987481	0.0155793	0.0698176	0.0256058	0.00153601	0.000548315	0.227374	0.71688	0.414234	0.207768	0.397767	0.0606581	-7.9394e-05	0.00921966	0.00156664	0.0615686
7456	29.2709	0.123723	0.0237545	0.0127998	0.00212415	642.874	0.199381	57.2364	728.09	29.1125	0.0239654	0.0011587	0.00652613	0.0158326	0.372642	1	15.3005	0.310704	0.0183202	0.30963	0.239433	0.0277645	0.290979	0.277768	0.00925344	0.216024	0.0496213	0.00217367	0.00829325	0.118794	0.0500822	0.0156955	0.00368425	0.0962556	0.0157913	0.0719717	0.0281829	0.00100338	0.000590585	0.236167	0.697524	0.424189	0.216859	0.399325	0.0582258	-0.000120279	0.00833424	0.00121136	0.0620043
7455	27.6744	0.125204	0.021946	0.0137164	0.00215351	636.881	0.196289	54.8534	726.883	28.709	0.0270871	0.0018202	0.00690681	0.0148263	0.315557	1	15.1791	0.306531	0.0205996	0.307468	0.230091	0.0265303	0.290511	0.299979	0.00716874	0.204928	0.0482198	0.00106322	0.00702151	0.122983	0.0503995	0.0152766	0.0030825	0.0958445	0.0153618	0.0712919	0.027681	0.00148008	0.00140106	0.224502	0.700253	0.413846	0.221115	0.400847	0.0593996	0.000129723	0.00849477	0.00133785	0.0601068
7467	10.923	0.140137	0.0186188	0.0130461	0.00327835	650.862	0.2003	52.6773	651.82	32.7894	0.0277077	0.0021694	0.00927185	0.0146779	0.400486	1	14.9548	0.30821	0.0179989	0.304953	0.226536	0.0257437	0.282288	0.268906	0.00875	0.214254	0.0475832	0.00260059	0.00691911	0.120307	0.0498496	0.0213773	0.00388983	0.097122	0.0168094	0.0746836	0.0344047	0.00217202	0.0016039	0.235678	0.728891	0.429416	0.219647	0.403073	0.0584196	4.32175e-05	0.00854576	0.0015092	0.0595105
7465	10.7732	0.139687	0.0215573	0.013941	0.00298151	655.462	0.19829	52.0873	642.844	33.6462	0.0293375	0.00205088	0.0103573	0.0140389	0.397493	1	14.879	0.315446	0.0196678	0.30789	0.229281	0.0271887	0.279028	0.253278	0.00644342	0.219284	0.0497644	0.00199943	0.00624779	0.123638	0.0514456	0.0198068	0.00435618	0.0942775	0.0180569	0.074148	0.0354801	0.00223194	0.00101289	0.240538	0.734168	0.429414	0.226423	0.405138	0.0623281	-0.000115033	0.00891231	0.00135763	0.0633771
7464	10.7328	0.140752	0.0208066	0.0140258	0.00314371	652.677	0.199808	51.3154	653.493	34.4117	0.0294802	0.00233869	0.0134259	0.0150428	0.401284	1	14.9877	0.310455	0.0194671	0.303221	0.227419	0.0262523	0.285059	0.263424	0.00853221	0.218662	0.0508107	0.00199531	0.00758633	0.121127	0.0488069	0.0208872	0.00364997	0.101148	0.0149546	0.0751243	0.0364955	0.0023441	0.00140319	0.238544	0.75351	0.428061	0.228116	0.411226	0.0607423	3.32196e-05	0.00952198	0.00143513	0.0610485
7463	10.6944	0.142962	0.0196805	0.0150021	0.00308112	660.601	0.19011	51.4055	656.707	31.949	0.0344922	0.00284262	0.00939603	0.0156627	0.410814	1	15.042	0.309351	0.0177393	0.312933	0.225239	0.0261788	0.282069	0.261154	0.00594616	0.219156	0.0482351	0.00187205	0.00768931	0.124643	0.0503174	0.0207789	0.00397021	0.0968351	0.016277	0.0718376	0.0350672	0.00299706	0.00180216	0.235038	0.737893	0.434073	0.222339	0.409721	0.0619091	-2.66018e-06	0.00977528	0.00159134	0.0579949
7466	10.6665	0.14088	0.0197996	0.014303	0.00310369	646.282	0.200838	53.1797	640.365	33.9685	0.0299343	0.00330004	0.0101998	0.0133525	0.379973	1	15.0049	0.30644	0.0191388	0.307879	0.225745	0.0259082	0.277073	0.276706	0.00838812	0.214377	0.047976	0.00210657	0.00739365	0.126703	0.0491529	0.0206908	0.00441104	0.0957304	0.0160107	0.073492	0.0364071	0.00227745	0.000742619	0.241367	0.739973	0.434171	0.22362	0.413742	0.0628026	3.10298e-05	0.00914532	0.00193449	0.0610449
7462	10.3326	0.132296	0.0198663	0.0133025	0.00272923	640.387	0.193073	50.444	633.282	26.912	0.0299021	0.00145999	0.0125269	0.0128965	0.383369	1	14.8183	0.297498	0.0182893	0.299679	0.223188	0.0274601	0.27091	0.258052	0.00793456	0.203378	0.0432271	0.0020163	0.00726172	0.118849	0.0498542	0.0189273	0.0032193	0.0961831	0.015385	0.075597	0.0366611	0.00253535	0.00155847	0.236154	0.752011	0.434877	0.219754	0.410218	0.0621172	-5.64152e-05	0.00904256	0.00177877	0.0629819
7461	10.2107	0.134238	0.0185741	0.0143165	0.00316556	642.568	0.190107	50.3417	631.159	26.7528	0.0280169	0.00237314	0.0116721	0.0162654	0.404496	1	14.7727	0.296244	0.0182464	0.305288	0.22677	0.0257737	0.271804	0.249781	0.00618116	0.204837	0.0469182	0.00240383	0.00649196	0.121346	0.0474195	0.0210052	0.00447067	0.0973995	0.0145982	0.0721036	0.03482	0.00234609	0.00302472	0.24301	0.753475	0.439562	0.220394	0.414085	0.0612521	-2.07859e-05	0.00822896	0.00180674	0.0613544
7460	10.1928	0.138278	0.0201374	0.0137955	0.00335859	660.856	0.202858	52.3417	654.623	26.2118	0.0303005	1.44313e-05	0.0102653	0.0145828	0.373723	1	15.3031	0.301875	0.0183816	0.313774	0.235924	0.0258613	0.283217	0.27173	0.00714254	0.214936	0.0477329	0.00196449	0.00688627	0.123677	0.0515336	0.0214715	0.00425683	0.0989475	0.014944	0.0761347	0.0374301	0.00297381	0.00149274	0.244947	0.771276	0.448472	0.229534	0.423217	0.0619283	6.23725e-05	0.00973764	0.00160333	0.06284
7475	7.07763	0.147456	0.0228936	0.0192524	0.00388044	654.469	0.209282	50.6767	709.045	35.6451	0.0376806	0.00272172	0.0119779	0.0147151	0.404748	1	14.8008	0.301837	0.018195	0.303624	0.227012	0.025714	0.286316	0.256403	0.00824984	0.218174	0.0511426	0.00294374	0.00692644	0.125815	0.0505505	0.0264132	0.00440136	0.102318	0.0165588	0.0758844	0.0419774	0.00379004	0.00144869	0.239829	0.740358	0.421026	0.21978	0.398938	0.0583167	-6.02265e-05	0.0103389	0.00144005	0.0729533
7474	6.94032	0.145144	0.0252712	0.0203021	0.00331217	667.395	0.211835	52.4648	728.35	37.5164	0.0390901	0.00437931	0.0134381	0.0137874	0.407209	1	15.0157	0.307874	0.0187198	0.302884	0.224591	0.0254365	0.28507	0.262631	0.00700523	0.221806	0.0494001	0.002609	0.00809556	0.128764	0.0511356	0.025783	0.00360963	0.102266	0.0155192	0.0771366	0.0459408	0.00301284	0.00191864	0.246638	0.751546	0.435193	0.224027	0.404794	0.0616689	-6.28002e-05	0.00984828	0.00177322	0.0709314
7473	6.55671	0.150392	0.0252436	0.0213668	0.0032146	667.429	0.212623	52.2072	740.943	38.6493	0.040088	0.00195863	0.0127317	0.014203	0.403631	1	14.8565	0.31157	0.0192392	0.299277	0.229963	0.0254574	0.294597	0.258183	0.0072524	0.224807	0.0478161	0.00207378	0.00748074	0.126895	0.0508704	0.0248166	0.00374806	0.1041	0.015455	0.0762514	0.0447589	0.00314806	0.00212048	0.241655	0.756344	0.431847	0.22194	0.408999	0.060128	-4.19228e-05	0.00917287	0.00155914	0.0744664
7472	6.3102	0.156979	0.0281564	0.0221184	0.0040929	690.076	0.212064	53.6654	782.364	40.2589	0.0382666	0.00303544	0.0139937	0.0169333	0.427919	1	15.2535	0.322779	0.0194524	0.315216	0.225945	0.0263148	0.29571	0.248703	0.0102724	0.227759	0.0553488	0.00239827	0.00412795	0.131645	0.0492146	0.0275811	0.00461983	0.107576	0.0167555	0.0793127	0.0442003	0.00344762	0.00196561	0.252427	0.774572	0.445862	0.232546	0.423953	0.064374	5.27769e-05	0.00949965	0.00190974	0.0761859
7468	4.34713	0.146087	0.0262758	0.0251498	0.00501642	690.969	0.19907	50.4543	746.246	40.2251	0.0438051	0.00209752	0.017429	0.0174748	0.401902	1	14.8866	0.295377	0.0185746	0.304359	0.220973	0.0241417	0.264136	0.219955	0.00833286	0.206862	0.0489301	0.00237976	0.00702478	0.127181	0.0496613	0.0301893	0.00553574	0.0968695	0.0171497	0.0772407	0.0547129	0.00367424	0.00228097	0.24605	0.755274	0.41542	0.20981	0.398886	0.0612765	3.61398e-05	0.0097129	0.00172943	0.0803136
7471	4.33114	0.151857	0.0255411	0.0244264	0.00468121	675.555	0.195629	49.239	728.103	37.5832	0.0409675	0.00323999	0.0173824	0.0127293	0.382863	1	14.7421	0.290146	0.0174197	0.300982	0.21362	0.0236721	0.261069	0.213737	0.00645996	0.212783	0.0463027	0.00225925	0.00603793	0.125512	0.0461244	0.0285497	0.00485985	0.0984494	0.0157564	0.0742609	0.0526999	0.00374172	0.00138652	0.241923	0.74044	0.402081	0.208472	0.391958	0.0587242	-5.10831e-05	0.00915868	0.00136326	0.0734154
7469	4.30732	0.158078	0.0251019	0.0273847	0.00450412	692.264	0.196052	51.0553	756.525	38.1736	0.0431696	0.00250652	0.0171736	0.0176029	0.391699	1	14.8069	0.29658	0.019232	0.303725	0.222307	0.0237123	0.269765	0.182877	0.00699344	0.206192	0.0466678	0.00210084	0.00678395	0.122285	0.0473148	0.0305964	0.00553999	0.0953711	0.0156109	0.076471	0.0544811	0.00474043	0.00214268	0.244164	0.757332	0.422136	0.209457	0.40233	0.0592082	1.13555e-05	0.00905375	0.00153768	0.0767601
7470	4.30318	0.149682	0.0268795	0.0252929	0.00436917	676.425	0.195207	48.9037	739.191	39.6426	0.0427532	0.00224167	0.0180699	0.0160219	0.387714	1	14.7317	0.289733	0.0175673	0.30333	0.217698	0.024413	0.275961	0.220225	0.00729631	0.210524	0.0463665	0.00271825	0.00679465	0.125342	0.0456694	0.0313091	0.00564947	0.0972086	0.0157996	0.0796288	0.0512571	0.00433363	0.00212565	0.244542	0.747201	0.406402	0.208998	0.397689	0.0598928	-4.22964e-06	0.00959456	0.00170688	0.0775578
7481	2.90918	0.152636	0.0307839	0.0312734	0.00741025	693.768	0.209901	47.4233	781.06	41.6464	0.0527722	0.00479214	0.0203323	0.0213719	0.414805	1	14.9641	0.282469	0.0179063	0.29763	0.216619	0.0239337	0.27936	0.22328	0.00670256	0.219055	0.0522389	0.0021589	0.00650807	0.121449	0.0480377	0.0333301	0.00632858	0.104347	0.0173733	0.0852334	0.0662284	0.00458896	0.00122079	0.244531	0.750824	0.389694	0.1959	0.387857	0.0576858	4.01405e-05	0.00864609	0.0017665	0.087487
7483	2.86508	0.158033	0.0314878	0.0317386	0.007373	697.623	0.21538	47.5069	797.227	41.3813	0.0554533	0.00349274	0.0204584	0.0200119	0.418347	1	14.8995	0.288701	0.0178521	0.297991	0.214286	0.0242657	0.273229	0.253398	0.00747518	0.218096	0.0494392	0.00187591	0.00739897	0.134223	0.0502139	0.039223	0.00637384	0.106344	0.0185072	0.0848666	0.0661234	0.00504845	0.00239126	0.253867	0.75981	0.393221	0.199483	0.390264	0.0584124	6.28602e-06	0.00969977	0.00208156	0.0876596
7480	2.85965	0.160256	0.0304912	0.0312763	0.00731091	702.697	0.205872	47.3601	786.905	41.4824	0.0547951	0.00330368	0.0220607	0.0176906	0.389349	1	14.9571	0.277227	0.0193577	0.299129	0.216281	0.0254337	0.278977	0.221001	0.00830962	0.216542	0.0497642	0.00227832	0.00686707	0.126728	0.0479728	0.0372068	0.00609354	0.103619	0.0186112	0.0834618	0.0657585	0.00412973	0.00325007	0.244521	0.756837	0.38942	0.200267	0.392301	0.0582196	5.24166e-05	0.00990302	0.00176632	0.0853665
7482	2.83456	0.163483	0.0307033	0.0310761	0.00701748	702.68	0.218321	48.0249	801.48	42.1093	0.0548149	0.00296718	0.0201714	0.0203176	0.403306	1	15.0227	0.279094	0.0164251	0.298323	0.216228	0.0246256	0.276148	0.249668	0.0083765	0.224873	0.0511198	0.00230542	0.00752778	0.135952	0.0513613	0.0376302	0.00582189	0.108614	0.0171958	0.0826611	0.0656443	0.00471976	0.0019447	0.252219	0.772644	0.392723	0.198072	0.394439	0.058977	-9.75192e-06	0.00923214	0.00167819	0.0917638
7479	2.7318	0.158913	0.0310236	0.0333133	0.00726671	704.111	0.20885	48.9353	824.042	42.9296	0.052025	0.00341364	0.0186159	0.0191792	0.383491	1	15.0272	0.280072	0.0183664	0.299125	0.21721	0.024744	0.276398	0.178217	0.00742782	0.21888	0.0498192	0.00234548	0.00734934	0.132033	0.0513154	0.03703	0.0061375	0.108501	0.0183277	0.0826297	0.0634637	0.00450543	0.00235457	0.254194	0.76338	0.398335	0.20024	0.396854	0.0591211	7.85783e-07	0.00923511	0.00197493	0.0938592
7478	2.67402	0.160087	0.0325589	0.0335039	0.00718012	722.018	0.215451	47.7333	839.317	42.8742	0.0534141	0.0036182	0.0159799	0.0166861	0.396361	1	15.0459	0.284543	0.0182917	0.302087	0.215891	0.0238147	0.2802	0.193579	0.00840043	0.220356	0.0530615	0.00229235	0.00670373	0.133741	0.0513702	0.0387977	0.00547449	0.106738	0.0183912	0.0805018	0.0639284	0.00537405	0.00264647	0.252847	0.774619	0.403258	0.202306	0.400132	0.0606014	-2.98279e-06	0.0100779	0.00189231	0.0928334
7477	2.67051	0.159328	0.0317766	0.0337398	0.00759617	702.951	0.214955	48.5295	833.457	43.2833	0.0554277	0.00451551	0.0180318	0.0193576	0.396576	1	14.8629	0.281773	0.0182545	0.296827	0.216287	0.0229313	0.273983	0.148672	0.00714925	0.220655	0.0505557	0.00248467	0.00819511	0.132679	0.0514052	0.0356547	0.00646668	0.102693	0.0160367	0.0800506	0.061984	0.005326	0.00178864	0.250672	0.75896	0.394509	0.197872	0.400177	0.0584658	3.9029e-06	0.00993273	0.00171651	0.0895315
7476	2.57736	0.159568	0.0297985	0.0299659	0.0078102	714.069	0.209426	49.1158	836.172	42.9539	0.0542941	0.00351567	0.0197365	0.0191861	0.421561	1	14.825	0.27559	0.0180571	0.297185	0.215647	0.0256365	0.277265	0.191542	0.00726139	0.216909	0.0502004	0.00221114	0.00636817	0.130942	0.0516323	0.0390765	0.00597903	0.100759	0.0172495	0.0822821	0.0658044	0.0046832	0.00132745	0.249481	0.765029	0.396371	0.202786	0.403375	0.0623249	0	0.00980218	0.00150686	0.0946813
7489	0.981046	0.169681	0.0392772	0.0470997	0.0194355	773.832	0.23641	43.8494	803.482	41.6136	0.0632301	0.00473644	0.0228172	0.0211781	0.435906	1	14.7116	0.231853	0.0177836	0.303802	0.238175	0.025795	0.298975	0.0661445	0.00831026	0.23133	0.0549839	0.00271912	0.00664584	0.151806	0.0568487	0.048433	0.00803568	0.131386	0.0197848	0.0981948	0.0866394	0.00825185	0.00361876	0.277261	0.765771	0.311851	0.146279	0.337842	0.0599413	-1.36473e-05	0.0106633	0.00201552	0.114532
7488	0.963685	0.167391	0.0385458	0.0459501	0.0185244	771.197	0.243752	45.6165	825.705	41.4829	0.0652233	0.00325574	0.0260727	0.0173544	0.438975	1	14.6263	0.234809	0.0164797	0.307668	0.231259	0.0247932	0.301033	0.134087	0.00777365	0.232783	0.0552415	0.00241127	0.00736321	0.152752	0.0581755	0.047791	0.00865506	0.13023	0.0232922	0.0940515	0.0865814	0.00785082	0.00269831	0.278604	0.787962	0.313748	0.153291	0.346541	0.0582979	8.61988e-07	0.0103634	0.0020772	0.115444
7487	0.961354	0.17762	0.0405553	0.0471284	0.019924	759.841	0.238466	43.6939	802.492	39.4372	0.064357	0.00469033	0.0254672	0.0167395	0.42925	1	14.5688	0.228429	0.0166144	0.30335	0.226299	0.0250626	0.294577	-0.0530772	0.00897964	0.230109	0.0515208	0.00250567	0.0070587	0.150054	0.0558255	0.0477999	0.00712286	0.130513	0.0226302	0.0942322	0.0847401	0.00794845	0.00228063	0.277734	0.771535	0.305137	0.148143	0.333902	0.0582447	3.02393e-05	0.0103623	0.00203273	0.112259
7491	0.957221	0.173212	0.0393807	0.0457518	0.018833	757.309	0.237513	42.0842	794.859	42.6664	0.0605911	0.00429715	0.0251897	0.0173494	0.432138	1	14.6002	0.229459	0.0159565	0.300297	0.218653	0.0263754	0.292736	0.0998655	0.00794632	0.226594	0.0518846	0.00208673	0.00790884	0.154858	0.0561853	0.0493048	0.00884576	0.130833	0.0212736	0.0952477	0.0870493	0.00732329	0.00193241	0.275924	0.779948	0.308654	0.154262	0.338397	0.057668	1.1716e-05	0.0100492	0.00193871	0.111966
7490	0.956384	0.172458	0.0397225	0.044528	0.0177182	778.374	0.236661	43.8974	803.936	41.5432	0.0668917	0.00417112	0.027084	0.019093	0.440435	1	14.8684	0.23765	0.0180597	0.306306	0.240074	0.0260445	0.298313	0.135953	0.008776	0.235068	0.0561127	0.0026791	0.00725105	0.162251	0.056298	0.0516336	0.00977932	0.135033	0.0225094	0.0965361	0.0874699	0.00799044	0.00306307	0.280708	0.779572	0.321195	0.154047	0.341161	0.0603076	1.74493e-05	0.0104848	0.00196032	0.114702
7485	0.955413	0.18709	0.0399319	0.0494265	0.0196252	815.952	0.237535	46.64	839.53	44.0764	0.0615927	0.00376263	0.0218242	0.0188064	0.444131	1	14.8742	0.230742	0.0161543	0.305619	0.229452	0.0263417	0.294032	0.0736136	0.00681192	0.231505	0.0544729	0.00218521	0.00657098	0.165984	0.0574083	0.0511192	0.00962896	0.131396	0.0228095	0.0960482	0.0872869	0.00852734	0.00247039	0.287188	0.784533	0.310406	0.151496	0.348069	0.0611305	-6.99379e-06	0.0100869	0.00187416	0.116897
7486	0.945742	0.176068	0.0394579	0.0479483	0.018831	767.455	0.243424	44.1108	813.862	40.4468	0.0632942	0.00531809	0.0291177	0.0192608	0.42915	1	14.6676	0.223228	0.016542	0.305746	0.23738	0.0257057	0.297583	0.139434	0.0077338	0.236104	0.055848	0.00248972	0.00786658	0.164697	0.0584073	0.0491435	0.00856986	0.132798	0.0224251	0.0955288	0.0867735	0.00837182	0.00305758	0.280001	0.781762	0.307692	0.148497	0.339403	0.0591114	1.46937e-05	0.00938301	0.00186577	0.118007
7484	0.940386	0.182694	0.0439104	0.0457245	0.0185082	810.343	0.24006	45.5964	843.819	44.2344	0.0609067	0.00333181	0.0231226	0.0182889	0.436072	1	14.7024	0.225067	0.0169891	0.305991	0.231567	0.025772	0.290409	0.127596	0.00783943	0.231945	0.0515172	0.00199279	0.00746707	0.161158	0.057538	0.052668	0.00965268	0.131943	0.0212371	0.0930757	0.0878038	0.00781823	-0.0011026	0.283814	0.787768	0.315231	0.150816	0.339049	0.0581036	1.11465e-05	0.0102912	0.00204633	0.113353
7492	0.536173	0.240449	0.0495044	0.0607895	0.0232997	972.359	0.280302	48.2471	879.544	46.9224	0.0775176	0.00412448	0.0318158	0.0230257	0.503575	1	15.4662	0.221732	0.0169361	0.337259	0.274342	0.0296592	0.346755	0.060568	0.00900375	0.261542	0.0625027	0.00241267	0.0084204	0.206107	0.0715364	0.063545	0.011574	0.165522	0.0267932	0.113889	0.108937	0.0106111	0.00308419	0.32117	0.774692	0.276433	0.131624	0.318689	0.0632758	-1.4067e-05	0.0115773	0.00166234	0.13033
7496	0.53579	0.229356	0.0467917	0.0618008	0.0234242	936.561	0.271138	47.5246	856.006	45.182	0.0735807	0.00511919	0.0297806	0.0200663	0.509351	1	14.9665	0.216378	0.0160562	0.337833	0.268517	0.0297064	0.336662	0.151477	0.00944236	0.255468	0.063247	0.00321072	0.00822134	0.192642	0.0668716	0.0619773	0.0101476	0.161114	0.0273245	0.117916	0.109189	0.00750357	0.0036039	0.316371	0.771943	0.271225	0.126565	0.309581	0.0626346	-2.44122e-05	0.0107564	0.00201402	0.132476
7495	0.534686	0.223715	0.0468185	0.0607095	0.0226792	919.215	0.267517	46.0838	853.519	45.1152	0.0680096	0.00764008	0.0307881	0.0180214	0.505265	1	14.8361	0.218019	0.0165314	0.326054	0.265715	0.0304186	0.327169	-0.0325164	0.00674161	0.255482	0.0585817	0.00247322	0.00958288	0.195596	0.0687222	0.0595317	0.0110387	0.154721	0.0247457	0.110553	0.109481	0.00953194	0.00259885	0.311181	0.762672	0.267161	0.127661	0.313217	0.062772	2.83838e-05	0.0115144	0.00215143	0.129235
7493	0.534599	0.228364	0.0506353	0.0624656	0.0233314	932.488	0.273358	47.8952	864.9	45.1903	0.0746527	0.00601949	0.0284814	0.018449	0.474097	1	14.8676	0.219647	0.0153276	0.329917	0.269554	0.0286312	0.332801	0.0334161	0.00835815	0.256332	0.0578638	0.00315949	0.00884552	0.190637	0.0653891	0.0603905	0.0116349	0.159902	0.0260245	0.110204	0.10612	0.0107747	0.00442059	0.308376	0.75264	0.272364	0.129676	0.306634	0.0614655	9.92976e-06	0.0101292	0.00202732	0.130901
7494	0.531505	0.240619	0.0509591	0.0657265	0.0240984	943.299	0.273483	47.4925	853.653	46.0203	0.0740959	0.00399476	0.028863	0.0189024	0.504266	1	15.1691	0.219233	0.0164074	0.337131	0.265277	0.0300957	0.339146	0.0911392	0.00916305	0.260813	0.0635373	0.00253471	0.00961867	0.199388	0.0677968	0.0604832	0.0118001	0.163696	0.0270519	0.109371	0.105544	0.00966444	0.00316389	0.313427	0.771727	0.273634	0.131947	0.313418	0.0627963	3.83934e-05	0.0117941	0.00217009	0.13266
7497	0.525516	0.228695	0.0478616	0.0612811	0.0226605	943.313	0.263271	44.9696	843.126	44.5082	0.0747886	0.00481203	0.0224565	0.0208046	0.502679	1	15.1389	0.218793	0.0171851	0.331764	0.258351	0.0313241	0.334331	0.022245	0.00928551	0.258985	0.0615985	0.00345447	0.00859024	0.191122	0.0658685	0.0620866	0.0104529	0.161506	0.0266925	0.113586	0.11064	0.0102295	0.0018851	0.321144	0.768162	0.272015	0.129399	0.319455	0.0629518	2.59544e-05	0.0118627	0.00260101	0.130182
7498	0.512594	0.23268	0.0495394	0.0610135	0.0220206	957.624	0.273579	46.9641	864.484	44.5089	0.0725574	0.00352971	0.0295635	0.0146299	0.504511	1	15.0972	0.216286	0.0169814	0.332916	0.276041	0.0299485	0.33674	-0.0155557	0.00897296	0.26479	0.0617513	0.00298284	0.00879363	0.196348	0.0682927	0.0636456	0.0122874	0.163023	0.0259077	0.115308	0.111612	0.00956918	0.00330893	0.315584	0.77901	0.272068	0.126837	0.310368	0.0645783	2.81178e-05	0.0126364	0.00233178	0.11785
7504	0.369812	0.244727	0.0482097	0.0753783	0.0245037	1080.27	0.308615	48.8348	853.485	43.6455	0.0851135	-0.00045819	0.0334031	-0.0302981	0.497809	1	15.3711	0.230835	0.0171738	0.369544	0.32813	0.0330359	0.376746	0.24002	0.0109856	0.291152	0.0739154	0.00432544	0.0109377	0.218478	0.07847	0.0704226	0.0118798	0.187774	0.0304809	0.124252	0.128915	0.0113665	0.00492218	0.339505	0.717873	0.238675	0.112107	0.279553	0.0625527	0	0.0114587	0.00224577	0.141441
7502	0.363349	0.271683	0.0539724	0.0779	0.0246874	1148.6	0.323526	51.1303	892.814	44.8994	0.0977739	0.00281348	0.0394348	0.0230949	0.575082	1	15.34	0.228934	0.0166424	0.365224	0.324354	0.036676	0.367434	0.234739	0.0110787	0.299012	0.0735117	0.00348674	0.0105587	0.229216	0.0793586	0.0755425	0.014537	0.188677	0.0308075	0.128246	0.129144	0.0132953	0.00376533	0.34047	0.72073	0.232181	0.108778	0.273932	0.0639097	3.83314e-05	0.0120098	0.00252759	0.144753
7503	0.363052	0.248174	0.0509134	0.0749202	0.0236886	1085.29	0.310193	49.761	867.218	43.0311	0.0867091	0.00326873	0.0370208	0.0196422	0.537336	1	15.4087	0.236358	0.0162981	0.360844	0.304938	0.0365777	0.370168	0.0306971	0.00964253	0.289386	0.0727829	0.00304715	0.00932067	0.226009	0.077935	0.0716765	0.0134226	0.18601	0.0304313	0.128812	0.121546	0.010845	0.00217931	0.336958	0.70476	0.237987	0.111296	0.270214	0.0625971	5.699e-05	0.0118846	0.00250891	0.142001
7501	0.36027	0.257993	0.0504097	0.076663	0.0246912	1123.25	0.314913	49.4126	880.656	45.2605	0.096662	0.000555962	0.0399304	0.0218147	0.517655	1	15.119	0.224796	0.0157044	0.364886	0.322638	0.0341973	0.371435	-0.174171	0.0127949	0.295137	0.0710718	0.00306533	0.0107338	0.218586	0.0825747	0.0697404	0.0108239	0.187318	0.029048	0.128051	0.12505	0.0126924	0.00360738	0.336451	0.704417	0.231921	0.108486	0.268396	0.0630536	-2.77016e-05	0.0111085	0.00244268	0.141664
7500	0.355175	0.270192	0.0542924	0.0799575	0.0267293	1167.3	0.330262	51.4127	894.748	46.4269	0.0984903	0.003995	0.0433017	0.0217429	0.544062	1	15.4716	0.238342	0.0160878	0.361232	0.324595	0.0325786	0.372962	0.0251283	0.0116792	0.302886	0.0734431	0.00343158	0.0114708	0.234009	0.0803666	0.0757238	0.0124189	0.188738	0.0291154	0.13158	0.130025	0.0130937	0.00315438	0.33831	0.718281	0.239983	0.112314	0.270371	0.064537	2.55072e-05	0.0130808	0.00268423	0.144703
7499	0.353291	0.2818	0.0585741	0.082362	0.0275768	1177.5	0.338751	52.674	922.373	47.7552	0.0974835	0.00492502	0.0378311	0.0282513	0.488175	1	15.6687	0.238715	0.0172447	0.362306	0.329355	0.0338162	0.376395	-0.00301345	0.011025	0.298256	0.0764197	0.00379624	0.0106103	0.244846	0.0814534	0.0786716	0.0126276	0.18975	0.0310591	0.136831	0.130603	0.00973868	0.00516314	0.34349	0.72216	0.244039	0.112834	0.279374	0.0669853	8.69386e-05	0.0125764	0.00227617	0.144458
7506	0.156518	0.411057	0.0711501	0.103179	0.0294578	1535.22	0.377419	58.2595	890.454	44.9389	0.106123	-0.0821406	0.0203287	0.0227117	0.230707	1	15.9224	0.370044	0.0156469	0.404416	0.4198	0.046702	0.421823	0.771383	0.0334721	0.344921	0.0976713	0.00657942	0.0144908	0.297416	0.103385	0.092579	0.0152135	0.223649	0.032732	0.153399	0.153831	0.0127524	0.00317962	0.390363	0.658774	0.200161	0.0879995	0.230001	0.0657677	8.75658e-06	0.0153318	0.00396585	0.167135
7505	0.155416	0.429403	0.0823391	0.105151	0.0293554	1581.04	0.385058	60.6195	907.868	46.6055	0.113981	-0.158352	0.0268156	0.0174852	0.00825911	1	16.0258	0.374928	0.017039	0.416254	0.411256	0.0448665	0.431712	-0.790888	0.0311448	0.346221	0.0961714	0.00714478	0.0134233	0.296841	0.0980826	0.0932023	0.0169399	0.224702	0.0346093	0.153083	0.154854	0.0111757	0.00119513	0.397754	0.664128	0.196511	0.0905602	0.225337	0.0677654	1.72228e-05	0.0141009	0.00401608	0.163265
7507	0.153344	0.405772	0.0757701	0.102403	0.0286589	1542.06	0.3803	58.6931	871.256	42.4472	0.102641	-0.0876038	0.0148433	0.0176464	0.247404	1	15.7877	0.375961	0.0155916	0.40728	0.417144	0.0439579	0.440624	0.144813	0.0346048	0.341701	0.100153	0.0056511	0.0133381	0.295321	0.0990534	0.0914453	0.0142123	0.224165	0.0333833	0.147463	0.156788	0.0136849	0.0015989	0.391408	0.660538	0.197978	0.0907484	0.230828	0.0694707	-9.9415e-06	0.0139153	0.00397312	0.166103
7513	0.0538571	0.639848	0.0864048	0.110466	0.0266707	2038.33	0.459231	57.5988	784.127	33.1228	0.0999205	-0.111199	0.0167719	0.0163114	0.817254	1	17.2793	1.34829	0.014552	0.383574	0.563114	0.0564654	0.472775	1.10172	0.675189	0.392045	0.151357	0.0270015	0.0151519	0.352511	0.115271	0.102519	0.0173053	0.252825	0.0307438	0.143668	0.140046	0.0218425	0.00022576	0.412552	0.595132	0.147987	0.0633716	0.176557	0.0580534	0.000122322	0.017404	0.0110437	0.18083
7510	0.0530555	0.653193	0.0876194	0.106618	0.0295631	2091.9	0.470272	58.7321	797.039	34.1072	0.136824	0.330611	0.056299	0.0189026	1.77865	1	17.6047	1.43754	0.0152141	0.396178	0.564454	0.0540887	0.490161	0.678899	0.750738	0.386974	0.163631	0.0320074	0.0162979	0.359859	0.119697	0.10981	0.0220549	0.264454	0.033475	0.14743	0.159056	0.00735043	-0.00510121	0.432813	0.631221	0.147118	0.0705676	0.178936	0.0587624	4.42905e-05	0.0160729	0.0120237	0.194196
7511	0.053023	0.629108	0.0822488	0.103352	0.0276695	2028.61	0.470354	68.444	787.45	33.0315	0.10911	-0.191897	0.0168932	0.0206923	0.500441	1	17.3299	1.3774	0.0140868	0.383089	0.561316	0.0576338	0.447966	0.981577	0.695058	0.380713	0.153029	0.029336	0.0164703	0.345117	0.112713	0.104604	0.0174725	0.24437	0.0308836	0.140046	0.151942	-0.00307818	7.87475e-05	0.421546	0.591422	0.142935	0.0639018	0.171073	0.0573956	3.39636e-05	0.0166534	0.0111713	0.18226
7508	0.0240006	0.909944	0.0919239	0.114627	0.0299548	2674.05	0.561621	65.6013	756.418	30.2609	0.0543462	0.338926	-0.154911	0.0209854	-1.08573	1	18.4517	3.43839	0.0121325	0.352275	0.668161	0.0581205	0.500733	2.40781	3.76447	0.433703	0.197591	0.107315	0.0197635	0.4432	0.142508	0.11572	0.0222004	0.264542	0.0297657	0.144457	0.148044	-5.33645e-05	-0.000520189	0.455193	0.570449	0.101346	0.0464558	0.134998	0.0469988	2.70273e-05	0.0183654	0.0234496	0.186033
7509	0.0237506	0.87722	0.0982752	0.11933	0.030746	2714.48	0.591594	75.8554	746.332	31.3518	0.0882837	4.78023	-0.0942605	0.0283519	0.571375	1	18.4578	3.28558	0.0131618	0.358928	0.702641	0.0608592	0.508706	-0.452783	3.87192	0.428202	0.19476	0.111274	0.0186733	0.445588	0.143803	0.123413	0.0216285	0.294142	0.0325435	0.146946	0.15015	-0.0011809	0.000429165	0.443136	0.572371	0.101685	0.048939	0.138117	0.0484257	0	0.0178064	0.0222765	0.204722
[truncated: 43 more columns]

## Sheet: BAM-S005B
file	NAI	Li(7)	Be(9)	B(11)	Ca2+(21.5)	Na(23)	Mg(24)	Al(27)	Si(28)	Si(29)	P(31)	S(33)	S(34)	Cl(35)	K(39)	Ca(43)	Ca(44)	Sc(45)	Ti(49)	V(51)	Cr(52)	Cr(53)	Mn(55)	Fe(56)	Fe(57)	Co(59)	Ni(60)	Ni(61)	Ni(62)	Cu(63)	Cu(65)	Zn(66)	Zn(67)	Ga(71)	Ge(73)	Ge(74)	As(75)	Se(77)	Br(79)	Rb(85)	Sr(88)	Y(89)	Zr(90)	Nb(93)	Mo(95)	Ru(101)	Rh(103)	Pd(105)	Ag(107)
7453	32.2437	0.0248481	0.000183291	0.00730065	0.0021213	655.346	57.5409	26.8605	766.276	32.9096	0.0171292	0.00183149	0.0140372	0.0231219	45.4451	1	15.3348	0.0101598	0.0547363	1.7406	0.0817428	0.0106616	0.821648	1.99517	0.0510092	0.293814	0.0750164	0.00264401	0.00985236	0.331316	0.141454	0.0854373	0.0138753	0.00480131	0.000999979	0.00175956	0.0951555	0.00159193	0.000674432	0.00181135	1.43155	0.0261405	3.76552	0.00456933	0.419644	0.000132877	-0.000136159	-0.000220526	0.0004819
7454	32.042	0.0259523	0.000173121	0.00725325	0.00200803	667.684	56.1227	26.9057	779.18	32.5125	0.0166712	0.0028887	0.0155497	0.0247842	43.4234	1	15.71	0.00689937	0.0509522	1.75304	0.0926949	0.010404	0.839979	1.99724	0.0502287	0.301789	0.0780347	0.00343906	0.00986742	0.325765	0.142776	0.0829619	0.0123276	0.00413354	0.000432226	0.00119099	0.0911068	0.00157381	-0.000221372	0.00282459	1.44804	0.0234865	3.78298	0.00560587	0.420612	6.93893e-05	8.86609e-05	0.00017068	0.000194441
7452	32.0048	0.0270926	-8.04522e-05	0.00794594	0.00194457	666.155	58.0554	26.787	774.931	32.6186	0.0177585	0.00150508	0.0205959	0.028245	46.5456	1	15.3168	0.0103934	0.0527782	1.74021	0.0811486	0.0101739	0.827354	1.95099	0.0482434	0.300754	0.0713788	0.0035386	0.0103404	0.321685	0.145246	0.0805291	0.0126041	0.00363054	-0.000585404	0.0014052	0.0911831	0.00125056	0.000402935	0.0029523	1.44503	0.02268	3.75225	0.0040626	0.414092	5.81108e-05	0.000180115	-0.000121567	0.00030839
7459	31.6998	0.0253911	-0.00034622	0.00753853	0.00274985	669.023	59.772	25.7257	790.251	31.4319	0.0163142	0.00251328	0.0198328	0.0254167	47.7214	1	15.1818	0.00881505	0.0524853	1.70134	0.0794113	0.00896236	0.80171	1.87105	0.0450971	0.285866	0.0687849	0.00340544	0.00958082	0.309651	0.135425	0.0716717	0.0102976	0.00366517	0.000310504	0.0020901	0.087943	0.00132884	0.00183193	0.00436817	1.38986	0.0221252	3.61712	0.00237426	0.412186	0.000298837	4.36304e-05	-0.000153316	0.000459194
7458	31.6993	0.0237257	2.85149e-05	0.00611401	0.00292289	692.321	56.3525	25.8799	791.446	31.7332	0.0159043	0.00455135	0.0128422	0.0291305	48.8726	1	15.2461	0.0108366	0.050494	1.7171	0.0794984	0.00972857	0.820419	1.95809	0.0492904	0.286555	0.0675587	0.00291324	0.0104309	0.310434	0.134253	0.0783434	0.0138029	0.00401075	0.000664429	0.00108123	0.0900614	0.00134898	0.0010211	0.00167133	1.40958	0.024528	3.63879	0.00623252	0.409676	7.67002e-05	0.00058159	-0.000106327	-0.000147274
7457	31.413	0.0242029	4.78426e-05	0.00789531	0.0021706	683.741	58.0528	25.677	793.926	31.7933	0.0169837	0.00254391	0.015855	0.0233169	46.1741	1	15.1462	0.00728465	0.050437	1.71612	0.0735252	0.00846812	0.810993	1.92883	0.0430126	0.275274	0.0706537	0.00336168	0.0116981	0.309442	0.13686	0.0721831	0.0120981	0.00410236	0.000460215	0.000240341	0.0881396	0.00115323	0.00138464	0.00584781	1.38966	0.0242244	3.63794	0.001156	0.401997	-0.000205806	-0.000151054	-2.06103e-05	0.00063024
7456	29.2709	0.0267671	-0.000210134	0.00671717	0.00250106	688.52	57.7923	25.8045	800.784	31.8837	0.0184272	0.00247694	0.0143371	0.0284585	37.1319	1	15.2608	0.00946323	0.0494237	1.74436	0.0814369	0.0095967	0.81367	1.94884	0.0421561	0.279122	0.068133	0.00251562	0.0117807	0.31441	0.137772	0.0738987	0.0111768	0.00416186	0.000380524	0.0013367	0.0877286	0.00131177	0.000495721	0.00289319	1.39141	0.0235778	3.66692	0.00328158	0.403917	7.43669e-05	-9.99206e-05	9.74842e-05	-0.000227907
7455	27.6744	0.0241438	0.000321823	0.00879712	0.00187482	693.303	60.1827	26.3936	817.881	32.4185	0.017338	0.00341944	0.0181323	0.0321209	30.5273	1	15.4313	0.0102039	0.0484241	1.7693	0.0769531	0.00960547	0.82894	1.93237	0.0485817	0.292937	0.0745573	0.00238954	0.0108645	0.31383	0.14047	0.0758887	0.0106324	0.00358328	0.000126974	0.00065747	0.0884739	0.00137199	0.000869752	0.000816628	1.42979	0.027472	3.75587	0.00615271	0.414496	-0.000179129	9.43745e-05	0.000282653	0.000295127
7467	10.923	0.0273884	-3.08409e-05	0.00862979	0.00273804	718.538	59.5975	32.6103	714.625	36.985	0.0193405	0.00494603	0.0236004	0.021677	46.2297	1	15.0493	0.00953726	0.0513849	1.71477	0.074589	0.00900618	0.786873	1.81992	0.0452787	0.283849	0.0697032	0.00259962	0.0106664	0.317393	0.135452	0.0997211	0.0147091	0.0042897	0.000578136	0.00162075	0.117656	0.00276448	0.0016315	0.00452181	1.47256	0.0249856	3.76825	0.0033272	0.419121	1.25216e-05	-9.01492e-05	-5.0512e-05	1.40183e-05
7465	10.7732	0.0298797	-2.43674e-06	0.0103388	0.00312693	733.548	61.0525	24.7293	721.77	38.4071	0.022728	0.00573545	0.0282748	0.0190793	47.7995	1	15.3318	0.0106154	0.0515723	1.76598	0.0835746	0.00895294	0.808512	1.89535	0.0469642	0.294892	0.0735452	0.00283462	0.0112596	0.32821	0.139293	0.101338	0.0165751	0.00393765	0.000380864	0.00144671	0.117339	0.00261608	0.0018389	0.00157377	1.51076	0.0264667	3.92243	0.00368381	0.430624	-7.12731e-05	-4.49404e-06	-0.000117577	0.000216163
7464	10.7328	0.03078	-4.43538e-05	0.00836452	0.00260998	714.178	58.0127	32.5048	718.309	36.4271	0.0221015	0.00499171	0.0275207	0.0247027	46.5725	1	15.0917	0.0116888	0.0524288	1.74723	0.0799593	0.00885028	0.804165	1.86052	0.0446503	0.288195	0.0753922	0.00322673	0.010518	0.316929	0.140247	0.0993715	0.0154305	0.00464744	0.000247749	0.000851769	0.113753	0.00267319	0.00296888	0.0039127	1.48046	0.0241198	3.82751	0.00370732	0.418775	-2.48223e-05	9.20539e-05	5.26368e-05	0.000253368
7463	10.6944	0.026776	-2.14412e-05	0.0102104	0.00330069	712.388	57.7364	30.6804	727.064	37.4772	0.023212	0.00345704	0.028552	0.0277696	45.2389	1	14.9751	0.0107662	0.0501985	1.73746	0.080393	0.00885981	0.790558	1.82772	0.0429272	0.286314	0.0705862	0.0030812	0.0105755	0.312874	0.136292	0.0979235	0.0144191	0.00370257	0.000226882	0.00118067	0.117385	0.00235809	0.00191029	0.00293592	1.47705	0.0247682	3.78001	0.00374082	0.421138	1.01994e-05	0.000181344	-4.09412e-06	1.7263e-05
7466	10.6665	0.0297118	0.000304351	0.00914227	0.00315569	702.051	56.9741	31.523	712.889	37.3413	0.0216471	0.00542148	0.0240165	0.0215948	46.9434	1	15.0098	0.00915515	0.0489229	1.72609	0.0769091	0.00868108	0.785415	1.82683	0.0446277	0.287885	0.0719182	0.00334223	0.0101263	0.320748	0.141863	0.101143	0.0148627	0.00425376	0.000296955	0.00166252	0.113954	0.00271221	0.00132922	0.00221864	1.49027	0.0246369	3.80855	0.00466181	0.416999	-4.56031e-05	5.04204e-05	7.3873e-05	0.000249529
7462	10.3326	0.0280735	0.000100644	0.00899817	0.00283682	704.615	56.3716	23.8333	699.31	36.1221	0.0185849	0.00538306	0.026796	0.0237954	46.2672	1	14.9454	0.00967699	0.0521163	1.71868	0.0780747	0.00861917	0.772186	1.82384	0.0468691	0.282714	0.0730824	0.00322784	0.011431	0.307235	0.135209	0.0974515	0.0149736	0.00422225	5.27419e-05	0.00186847	0.114747	0.00330233	0.00187426	0.0021257	1.49193	0.0235843	3.84748	0.00255519	0.425332	-5.90244e-05	0.000119031	-2.35413e-05	-3.87971e-05
7461	10.2107	0.0257392	-0.000119519	0.00928606	0.00331737	713.77	55.1816	24.3556	711.213	35.8759	0.0195906	0.00387212	0.0254665	0.0231147	45.4445	1	15.0703	0.00756032	0.051797	1.75529	0.0797684	0.0089993	0.791085	1.84069	0.0483565	0.28533	0.069791	0.00315446	0.0101547	0.30994	0.137199	0.0990594	0.0143492	0.00403672	0.000444264	0.00146719	0.1154	0.00294531	0.00104184	0.00173997	1.51439	0.0247492	3.891	0.00442843	0.424656	-0.000120254	7.55612e-05	3.2671e-05	2.54953e-05
7460	10.1928	0.0273492	-6.12288e-05	0.00928837	0.00269581	706.931	55.4743	24.229	714.81	35.8376	0.0202211	0.00454211	0.0247849	0.0222484	46.8552	1	14.9745	0.0115304	0.0522799	1.72717	0.080505	0.00824899	0.783018	1.8367	0.0485961	0.281114	0.0707732	0.00251987	0.0097207	0.305458	0.13027	0.0980786	0.014791	0.00335042	-9.1701e-05	0.00194538	0.117518	0.00312736	0.00221736	0.00423793	1.53028	0.025722	3.88313	0.00346882	0.425512	1.70918e-05	6.90079e-05	0.000276818	0.000217158
7475	7.07763	0.0296828	1.28552e-05	0.0126079	0.00367764	721.563	57.782	32.2192	778.411	41.1268	0.0260285	0.0066887	0.030857	0.029116	46.2358	1	14.931	0.0115075	0.050949	1.71041	0.0796939	0.00848945	0.788313	1.84499	0.0494193	0.297399	0.0751233	0.00318104	0.0098327	0.317051	0.143496	0.123191	0.0155051	0.0042726	0.000101286	0.00209155	0.138806	0.0038899	0.00165502	0.00368087	1.50122	0.0237026	3.67403	0.00365415	0.407208	-3.48483e-05	7.28262e-05	7.84073e-05	0.000253836
7474	6.94032	0.0313995	0.000126792	0.0123018	0.00337419	734.654	60.3337	32.1785	807.014	41.585	0.0255648	0.00506152	0.0337186	0.0255032	46.05	1	15.033	0.012196	0.0521842	1.70465	0.07521	0.00857959	0.788272	1.87295	0.0481116	0.29283	0.0740824	0.00291789	0.0108026	0.323252	0.143168	0.121282	0.0167733	0.00443373	0.000304884	0.00232892	0.135409	0.00417232	0.00191067	0.00276699	1.48072	0.0246653	3.69887	0.0029062	0.406414	-3.42965e-05	0.000135625	1.68046e-05	9.37639e-05
7473	6.55671	0.029129	3.55606e-05	0.0131532	0.00377931	710.593	58.9618	31.6194	797.874	42.5067	0.0294459	0.00556764	0.0372366	0.0261789	43.7217	1	14.8313	0.012901	0.0499209	1.68366	0.0803281	0.00837249	0.794813	1.8251	0.0475427	0.296478	0.0721475	0.00371795	0.0112178	0.315236	0.140421	0.122227	0.0175701	0.00429471	0.000225166	0.00245712	0.138617	0.0037609	0.00207938	0.00349798	1.48762	0.0271897	3.74497	0.00384079	0.411976	-6.15266e-05	0.000113014	4.09078e-06	0.00011455
7472	6.3102	0.0281621	-9.87611e-05	0.0146977	0.00345322	731.125	60.2674	32.5152	833.309	43.5359	0.0317578	0.00622488	0.037395	0.0260695	46.6625	1	15.0167	0.0152907	0.0505566	1.71918	0.0782467	0.00791773	0.805746	2.06553	0.0490579	0.297387	0.0706875	0.00316954	0.0086574	0.32881	0.137292	0.126232	0.017224	0.00426603	0.000197009	0.00168529	0.144138	0.00453956	0.00159086	0.00354127	1.53721	0.0256862	3.87889	0.00364619	0.422066	-4.74444e-05	-2.80646e-05	2.67484e-05	0.000155986
7468	4.34713	0.0301271	-4.43863e-05	0.0170896	0.00486327	744.083	57.8287	28.8639	821.648	43.3571	0.0276576	0.00646045	0.0427267	0.0236732	44.745	1	14.8415	0.011585	0.0508361	1.69462	0.0836726	0.00750053	0.760816	1.72147	0.0431198	0.283588	0.0690834	0.00279075	0.0101597	0.308403	0.130958	0.149868	0.0227283	0.00438944	0.00037619	0.00198286	0.169408	0.00553137	0.00191302	0.00385479	1.51307	0.0239269	3.66299	0.00359093	0.409061	1.26129e-05	8.23134e-05	-5.34643e-05	0.00031987
7471	4.33114	0.0282287	0.000130259	0.0147081	0.0046845	735.62	56.1391	26.0668	808.689	41.2527	0.0251656	0.00565273	0.0389447	0.0248341	45.8707	1	14.7772	0.00970521	0.0500113	1.67949	0.0779342	0.00924468	0.751603	1.70872	0.0434376	0.278117	0.0672332	0.00326697	0.0110182	0.299338	0.132779	0.151318	0.0230845	0.00451651	0.000352443	0.00273706	0.166213	0.00522227	0.00138859	0.00330032	1.49565	0.024457	3.65247	0.00305195	0.397265	-3.9546e-05	5.67939e-05	7.15519e-05	0.000134071
7469	4.30732	0.0284836	-1.34655e-05	0.0163821	0.00472534	744.147	57.6457	29.5442	814.068	42.6853	0.028326	0.00691772	0.0412082	0.0218628	46.3341	1	14.8986	0.0114922	0.0505928	1.68594	0.0772258	0.00752505	0.746778	1.7338	0.0432649	0.282344	0.0660372	0.00300265	0.0102118	0.307513	0.131055	0.148385	0.0221224	0.00480256	0.000445106	0.00175701	0.172515	0.0051446	0.00292607	0.00371289	1.4909	0.0250342	3.6313	0.00442812	0.402605	2.16119e-05	0.000139541	5.43961e-05	0.000226386
7470	4.30318	0.0317147	-8.05129e-05	0.0152394	0.00518766	726.517	57.4092	27.7789	806.363	42.1138	0.025152	0.00638336	0.0419395	0.0239176	46.4043	1	14.788	0.0108513	0.0507507	1.71542	0.0736902	0.00830145	0.760441	1.72349	0.0438918	0.278893	0.0693296	0.00326021	0.00974194	0.296972	0.130046	0.144915	0.0208182	0.00468243	0.000357832	0.00242045	0.173548	0.00510942	0.00145325	0.00249487	1.50336	0.0246114	3.64011	0.00423436	0.398809	-3.07702e-06	2.447e-05	-2.17012e-05	2.49825e-05
7481	2.90918	0.0308813	-2.3564e-07	0.018888	0.00840901	736.063	57.2974	26.3115	859.616	43.3166	0.0348422	0.00791854	0.0508517	0.0262877	46.2995	1	14.7484	0.0115795	0.0505549	1.67126	0.0830766	0.0077396	0.788491	1.80833	0.0455952	0.288163	0.071692	0.00331584	0.00963635	0.303744	0.136448	0.162546	0.022777	0.00634466	0.000380659	0.00166107	0.201237	0.00607486	0.00162583	0.00254618	1.48434	0.0213279	3.2436	0.00405772	0.379739	1.91586e-05	0.000151176	7.12422e-05	0.000323185
7483	2.86508	0.0337618	7.62115e-05	0.0207885	0.00719758	757.688	60.193	25.6723	880.743	45.6821	0.0320314	0.00821116	0.0515004	0.0295869	45.5724	1	14.9601	0.0116458	0.0486083	1.67192	0.0791237	0.00801252	0.767288	1.76726	0.0475543	0.295164	0.0718545	0.0033282	0.0113153	0.32737	0.148133	0.18346	0.0273876	0.00613201	0.000116163	0.0021413	0.206712	0.00682832	0.00228259	0.00368638	1.51317	0.0238624	3.37896	0.00412918	0.391515	5.33829e-05	5.90463e-05	7.96324e-06	0.000287959
7480	2.85965	0.0316182	-8.29404e-06	0.0202542	0.00743499	760.183	58.8839	26.6843	880.404	45.9031	0.0338906	0.00978963	0.0503299	0.0289464	46.4447	1	15.1215	0.0107673	0.049711	1.68752	0.0797366	0.00877945	0.77671	1.85581	0.0464322	0.296601	0.0724652	0.00340018	0.0113945	0.322218	0.140796	0.171493	0.025958	0.00638183	0.000207193	0.00207839	0.206108	0.00604904	0.00169955	0.00351709	1.52232	0.0230311	3.34453	0.00376159	0.390464	4.15284e-06	0.000154622	6.10068e-05	0.000443801
7482	2.83456	0.0331997	9.98811e-05	0.0196713	0.00684252	776.323	59.198	26.8379	877.441	47.093	0.035577	0.00944095	0.0486314	0.0274419	45.9011	1	15.0986	0.0121133	0.0468542	1.6938	0.0802753	0.00790378	0.767899	1.75676	0.0469722	0.291731	0.0748333	0.00314158	0.0100618	0.331376	0.147245	0.180779	0.0283624	0.00663125	0.000561184	0.00282543	0.208748	0.00677384	0.00252007	0.00382794	1.53514	0.0229532	3.39043	0.00340248	0.395134	-5.45615e-07	4.89262e-05	6.83578e-05	0.000293083
7479	2.7318	0.0309681	7.58838e-05	0.020315	0.00871118	775.066	59.6455	26.8225	913.481	47.6996	0.0335218	0.0086883	0.0501015	0.0301356	46.7882	1	15.0814	0.0124571	0.0502197	1.6969	0.0752179	0.00783288	0.782164	1.79333	0.0456746	0.291939	0.0726505	0.00307049	0.0106463	0.323449	0.142927	0.17674	0.0263339	0.00634506	0.000318136	0.00246075	0.205438	0.00643399	0.00278676	0.00325644	1.56481	0.0238441	3.43663	0.00353813	0.404501	1.70857e-05	9.67035e-05	3.44211e-05	0.000343158
7478	2.67402	0.0328704	7.40307e-05	0.0210744	0.00808868	763.861	61.2751	22.9467	903.206	46.9381	0.0352934	0.00751496	0.0464744	0.028717	47.4237	1	15.0969	0.0128901	0.051567	1.71106	0.0724552	0.00793582	0.774761	1.77811	0.0470848	0.294263	0.0760427	0.00364449	0.00912468	0.324394	0.150367	0.174533	0.0271264	0.00672471	0.000269154	0.0015417	0.202481	0.0065548	0.0025582	0.00367661	1.54756	0.0219236	3.44062	0.00388033	0.406304	4.97995e-05	0.000220887	5.53414e-05	0.000268132
7477	2.67051	0.0301222	-5.0453e-05	0.021144	0.00885641	766.93	60.5701	27.7134	910.051	46.8633	0.0365896	0.00702659	0.044937	0.0245834	45.3337	1	14.7612	0.0123937	0.048673	1.69545	0.0840827	0.00858567	0.782518	1.73684	0.0468743	0.289123	0.073223	0.0035983	0.0102045	0.32052	0.1382	0.175002	0.0267614	0.00621877	0.000634914	0.00203357	0.198048	0.00758982	0.00318525	0.00389102	1.53388	0.0234112	3.45814	0.00361043	0.399014	4.47709e-05	7.90129e-05	4.63052e-05	0.000199659
7476	2.57736	0.0325505	5.32517e-05	0.0230383	0.00821698	778.339	62.3381	26.4353	914.186	47.484	0.035642	0.00881378	0.0484709	0.0286838	47.3413	1	14.9278	0.0129847	0.0490537	1.69375	0.0751663	0.00792394	0.797452	1.78409	0.0438651	0.293933	0.0762113	0.00337055	0.00980598	0.335837	0.143055	0.179262	0.0272055	0.00620223	0.000292011	0.00241101	0.203633	0.00658808	0.00173462	0.00388266	1.55196	0.0227994	3.5066	0.00344275	0.405691	-9.12801e-06	7.54714e-05	4.5037e-05	0.000398901
7489	0.981046	0.0372176	2.30858e-05	0.030683	0.0190514	867.098	61.2121	27.0779	920.348	47.9278	0.0421723	0.0122829	0.0682569	0.033135	52.2265	1	15.1496	0.0163521	0.0457549	1.80082	0.0931913	0.00961645	0.885645	1.87903	0.0497623	0.319469	0.0825404	0.00376217	0.0106142	0.375542	0.16247	0.232413	0.0339073	0.0152044	0.000287076	0.00303072	0.282518	0.00985638	0.00267887	0.00446083	1.60409	0.0196384	2.59888	0.00328423	0.408316	2.16556e-05	0.000127973	6.36176e-05	0.000558867
7488	0.963685	0.0331535	4.87706e-05	0.028447	0.0183945	852.106	61.722	23.7098	893.442	47.94	0.0420727	0.00893946	0.0647038	0.0308319	49.6885	1	14.8742	0.0161748	0.0462513	1.73091	0.093561	0.00919983	0.858268	1.90045	0.0508465	0.322389	0.0792467	0.00392823	0.0112403	0.370291	0.160152	0.226623	0.0347022	0.0150605	0.000477052	0.00299345	0.280589	0.00924512	0.00203828	0.0037939	1.56635	0.0188466	2.56182	0.00278834	0.403948	2.12008e-05	0.000298897	0.000108299	0.000662613
7487	0.961354	0.0341163	6.75835e-05	0.0293549	0.018952	829.987	59.6872	21.5442	895.551	45.9671	0.0424419	0.0107437	0.063461	0.0290559	51.3875	1	14.5294	0.0161509	0.0461973	1.74203	0.082977	0.00923601	0.840146	1.80384	0.0502433	0.314983	0.0826288	0.00426081	0.0116117	0.369563	0.160686	0.223631	0.0336406	0.0149273	0.000286195	0.00258813	0.273163	0.00963133	0.00330466	0.00464058	1.53577	0.0176052	2.50784	0.00314043	0.389178	1.16352e-05	0.00013123	3.64504e-05	0.000635664
7491	0.957221	0.0359675	6.66203e-05	0.0276504	0.0171189	845.622	61.9093	22.0442	901.917	46.1725	0.038606	0.0112472	0.0615655	0.0313782	49.0231	1	14.844	0.0152708	0.0457327	1.74184	0.0831023	0.00823152	0.850898	1.77002	0.052022	0.318294	0.0801885	0.00341205	0.0124002	0.387419	0.164244	0.236879	0.0357465	0.0160007	0.000231603	0.00289477	0.282162	0.0100325	0.00262684	0.00429193	1.56398	0.0178276	2.60895	0.00342759	0.40316	0	0.000189842	4.48327e-05	0.000434886
7490	0.956384	0.0346211	2.71405e-05	0.0296261	0.0189375	828.716	57.8372	23.7929	886.394	45.8014	0.0415669	0.0113829	0.0640545	0.0287004	49.2642	1	14.4853	0.0154439	0.0442738	1.7145	0.0853513	0.00828538	0.81323	1.66445	0.0493606	0.306419	0.0813489	0.00338974	0.0109645	0.389946	0.167217	0.230947	0.0358625	0.0156945	0.000193947	0.00314922	0.282437	0.00944756	0.0020618	0.00385068	1.52734	0.0173266	2.59635	0.00334322	0.393849	0	0.000154057	9.13843e-05	0.000463847
7485	0.955413	0.039071	3.41059e-05	0.0302456	0.0187626	888.848	61.3911	24.3367	948.758	47.8914	0.0382262	0.0119859	0.0648102	0.0276478	53.5533	1	14.9806	0.0156342	0.0488258	1.75121	0.0794404	0.0089325	0.847174	1.80371	0.0498665	0.309354	0.0781583	0.0033686	0.0110618	0.390366	0.164964	0.240041	0.0376089	0.0156551	0.000190696	0.00159906	0.276248	0.00924621	0.0025781	0.00419328	1.56455	0.0189124	2.65782	0.00330847	0.408567	-7.75683e-06	0.000201043	3.9546e-05	0.000762822
7486	0.945742	0.0370326	-1.75914e-05	0.0332728	0.0185094	852.034	60.1776	26.6429	905.894	48.3512	0.0453379	0.0117667	0.0679967	0.0323746	50.1551	1	14.8778	0.0172532	0.0474525	1.7653	0.0974218	0.0083698	0.861295	1.82018	0.0514456	0.320779	0.082606	0.00353208	0.0121736	0.396825	0.171272	0.245097	0.0361309	0.0165655	0.00046822	0.0025879	0.284408	0.0105687	0.00184755	0.00454517	1.55627	0.0179575	2.58036	0.00303071	0.400894	3.49623e-06	0.000357027	8.03177e-05	0.000497276
7484	0.940386	0.0368442	0.000141135	0.0317568	0.0190601	891.607	63.534	23.0222	944.809	50.5536	0.0415979	0.0105678	0.0642556	0.0296324	52.4617	1	15.0879	0.0154497	0.0477784	1.8026	0.0923333	0.00909485	0.848959	1.82553	0.049996	0.310543	0.0811813	0.00393504	0.0114501	0.387666	0.165753	0.23738	0.0394142	0.0159443	0.000248401	0.0022966	0.279232	0.00911992	0.00283956	0.00442642	1.57869	0.0182649	2.68043	0.00287288	0.412799	2.5961e-05	0.000294258	0.000171348	0.000376903
7492	0.536173	0.0477946	6.42882e-05	0.0426203	0.0231419	1073.57	69.6039	23.2052	975.173	50.0693	0.0476965	0.017037	0.0807854	0.0373799	57.2521	1	15.1655	0.0237812	0.0456597	1.89852	0.108926	0.0120928	0.98171	1.85792	0.0591532	0.357399	0.0939477	0.00459766	0.0133115	0.479383	0.202493	0.304866	0.0479666	0.0230544	0.000432096	0.00417202	0.355264	0.0124177	0.00447307	0.00484583	1.5346	0.0170851	2.23406	0.00288049	0.432639	1.22766e-05	0.000211396	0.000101594	0.000504764
7496	0.53579	0.0450115	5.55958e-05	0.0409002	0.0233543	1026.48	67.9851	23.2209	952.299	50.2893	0.0442667	0.0129351	0.073674	0.0300961	59.2354	1	15.1798	0.0226703	0.0436341	1.88652	0.103311	0.00978802	0.962214	2.0298	0.0566223	0.345615	0.0914209	0.00400597	0.0127797	0.468088	0.195703	0.295757	0.0454912	0.0213354	0.000495063	0.00290779	0.344731	0.0122293	0.00299744	0.00476756	1.54167	0.0158831	2.23544	0.00341052	0.429428	1.94534e-05	0.000276966	0.000119694	0.000525883
7495	0.534686	0.0502327	4.12375e-05	0.0400051	0.0224092	1044.66	69.2165	23.2047	959.283	49.7089	0.0447306	0.0149914	0.0776547	0.0317442	58.6631	1	15.2569	0.0230127	0.0446001	1.89542	0.104585	0.0094362	0.957618	1.89981	0.0576895	0.345918	0.0903205	0.00437683	0.012239	0.466189	0.192946	0.305127	0.0444844	0.0223669	0.000811121	0.00299759	0.344812	0.0102742	0.00218631	0.00494108	1.53692	0.0160848	2.25471	0.00331611	0.427291	1.26508e-05	0.000303184	0.000125175	0.000559906
7493	0.534599	0.0465749	4.30346e-05	0.0422481	0.0238875	1054.82	70.192	23.1109	967.153	52.1071	0.0477649	0.0131681	0.0744858	0.0340291	58.3362	1	15.2016	0.023763	0.0455924	1.89854	0.107136	0.0104678	0.94494	1.83887	0.0576719	0.358844	0.0962012	0.00396256	0.0129093	0.480594	0.195245	0.302873	0.0471321	0.0223641	0.000400589	0.00282922	0.349588	0.0122564	0.00221743	0.00399273	1.5169	0.0153863	2.23692	0.00258089	0.421494	-8.86e-06	9.98277e-05	8.5104e-05	0.000615846
7494	0.531505	0.0457843	-3.28196e-05	0.0412936	0.022635	1050.09	69.5597	23.1217	962.979	50.4203	0.0425317	0.0113954	0.085129	0.0328149	57.835	1	15.197	0.0245109	0.0448276	1.9097	0.106137	0.0115377	0.961581	1.8712	0.059118	0.353928	0.0922708	0.00484371	0.0134561	0.467551	0.203117	0.302082	0.0470655	0.0217137	0.000270038	0.00266386	0.350979	0.0124896	0.00240242	0.00447114	1.53418	0.0156351	2.23429	0.0027018	0.433376	6.03427e-05	0.000354423	7.63897e-05	0.000696429
7497	0.525516	0.0452237	-9.15873e-06	0.0410852	0.0218004	1019.5	68.4605	22.6373	934.099	47.2647	0.0425697	0.0122986	0.0774436	0.0328642	58.0637	1	14.9996	0.0238914	0.0444719	1.86803	0.103457	0.0104149	0.93578	1.91169	0.0542751	0.348586	0.0913169	0.00404694	0.0136978	0.462256	0.194759	0.296123	0.0461991	0.0212386	0.000322914	0.00310643	0.346048	0.0115647	0.00279107	0.00479471	1.54282	0.0157834	2.21762	0.00273698	0.424888	-2.64367e-05	0.000212531	6.1727e-05	0.000520981
7498	0.512594	0.0448843	2.8553e-05	0.0379168	0.0225404	1040.83	67.3489	22.9537	947.893	48.9501	0.0427784	0.0108262	0.0755173	0.0290225	57.205	1	15.1436	0.0224859	0.0444335	1.92295	0.110082	0.0105615	0.958827	1.92547	0.0560561	0.359035	0.0918985	0.00434649	0.0130928	0.467533	0.192024	0.288746	0.0463306	0.0214583	0.000694058	0.00264331	0.341053	0.0121663	0.00349655	0.00441569	1.54307	0.0174272	2.26184	0.00343466	0.43467	5.37934e-06	0.000269394	9.85244e-05	0.000594474
7504	0.369812	0.0493773	0.000136106	0.0449274	0.0245217	1176.79	72.3929	25.3719	956.235	50.3513	0.0568207	0.018534	0.0920352	0.0347788	64.429	1	15.396	0.0391767	0.0442162	2.06676	0.138084	0.0127563	1.06499	2.14961	0.0619344	0.389186	0.10291	0.00454953	0.016494	0.54306	0.225316	0.344662	0.052824	0.0219941	0.000510896	0.00359436	0.404831	0.0131191	0.00462416	0.0049542	1.41275	0.013896	1.93103	0.00238565	0.432323	1.2328e-05	0.000406234	0.000267348	0.000973255
7502	0.363349	0.0535958	0	0.0474175	0.0262184	1222.92	78.1439	26.2244	986.768	49.5442	0.0573377	0.0234293	0.10393	0.0369051	64.3586	1	15.4319	0.0407692	0.0439948	2.03769	0.139998	0.012279	1.05741	1.94583	0.0616925	0.392147	0.103051	0.00402666	0.0142837	0.531639	0.222306	0.341236	0.0524566	0.0220223	0.000511291	0.00411583	0.412733	0.0136786	0.00287417	0.00493847	1.41998	0.0141358	1.95214	0.00253715	0.42909	1.37565e-05	0.000382262	0.000194674	0.000856898
7503	0.363052	0.0470471	0	0.0489245	0.0231321	1177.84	74.8844	25.3415	944.697	47.7408	0.0548471	0.0143548	0.102253	0.0334796	65.5161	1	15.2313	0.0366713	0.0468265	2.00327	0.132524	0.00990722	1.02913	1.99526	0.062501	0.388888	0.101185	0.00471962	0.0155494	0.529315	0.224571	0.333503	0.0555897	0.0230051	0.000727276	0.00413849	0.388659	0.0136066	0.00276376	0.00487598	1.36422	0.0121542	1.90093	0.00213806	0.415791	7.05384e-05	0.000180992	5.06891e-05	0.000905479
7501	0.36027	0.0445471	-1.9642e-05	0.0497136	0.0263079	1227.1	78.483	26.005	970.51	50.2366	0.0599137	0.0114252	0.0943445	0.0331243	65.9722	1	15.3653	0.0423924	0.0439074	2.06625	0.132414	0.0118936	1.07683	2.1082	0.0683136	0.394435	0.108819	0.00454157	0.0148812	0.547254	0.229678	0.339635	0.0547262	0.0237528	3.79911e-05	0.00477529	0.398231	0.0148938	0.00257144	0.00534404	1.40746	0.0143135	1.90263	0.00259796	0.423402	1.24859e-05	0.000104729	5.988e-05	0.00120243
7500	0.355175	0.054153	9.68272e-05	0.0499381	0.0261417	1283.7	78.3483	26.5359	1015.62	50.6777	0.0601951	0.0139669	0.0981034	0.038528	67.284	1	15.5655	0.0436705	0.0445391	2.08664	0.132422	0.0123878	1.0665	1.83405	0.0598849	0.397787	0.112188	0.00420314	0.0166573	0.569747	0.240173	0.35554	0.0589305	0.023549	0.000729945	0.00314623	0.410832	0.0135025	0.00293128	0.00437302	1.41612	0.0136262	1.93789	0.00300698	0.441057	-1.04434e-05	0.000297968	0.000202783	0.000609382
7499	0.353291	0.0567736	-1.85934e-05	0.0515724	0.0271952	1300.67	82.9163	26.7597	1022.09	55.5078	0.0622763	0.00424024	0.102261	0.0366769	66.8803	1	15.4963	0.048064	0.0431599	2.07971	0.137103	0.011498	1.07095	2.10701	0.0658396	0.401098	0.108405	0.00520454	0.0161501	0.576408	0.236455	0.355837	0.0556656	0.025733	-1.5232e-05	0.00468005	0.415708	0.0140257	0.0029808	0.00597402	1.42911	0.012821	1.93106	0.00266729	0.443786	-2.06475e-05	0.000208542	0.000164139	0.000808835
7506	0.156518	0.0798596	6.58666e-05	0.0655062	0.0290884	1698.23	94.0957	30.2835	981.991	49.0814	0.0545141	-0.05424	0.0969896	0.0352551	84.3037	1	16.0697	0.203656	0.0412237	2.31856	0.193146	0.0159765	1.20425	1.96689	0.0976782	0.457777	0.13639	0.0064395	0.018155	0.694454	0.292037	0.443246	0.0699565	0.0186805	0.000859899	0.00487533	0.490079	0.016359	0.000526522	0.0056604	1.3193	0.0114466	1.59958	0.00215463	0.457761	0	0.000538734	0.000364587	0.00211769
7505	0.155416	0.0833506	0.000100017	0.0669408	0.0267673	1716.14	96.3283	30.4054	994.371	49.9538	0.0658717	-0.0926237	0.0944695	0.0370964	84.5913	1	16.0933	0.217325	0.0442284	2.31541	0.185548	0.0152598	1.22229	3.24	0.104542	0.47618	0.141918	0.00752955	0.0208308	0.701274	0.289174	0.446282	0.0697139	0.0195944	0.00104017	0.00435477	0.50224	0.0216594	0.00358955	0.00592577	1.32522	0.0121668	1.62303	0.00300568	0.47161	0	0.000406956	0.000374751	0.00193302
7507	0.153344	0.0758784	8.01351e-05	0.0623166	0.0285254	1671.16	91.9067	29.9858	956.187	51.5113	0.0610279	-0.0931042	0.084974	0.0338053	82.6891	1	15.8163	0.205281	0.041703	2.25493	0.167439	0.0150434	1.18989	3.8792	0.0965849	0.448963	0.139417	0.00669873	0.0192642	0.679741	0.279621	0.433289	0.0674748	0.0176533	0.000532005	0.00430897	0.476193	0.0159274	0.00246349	0.00528687	1.28811	0.0114275	1.60992	0.00269263	0.45744	-9.1866e-06	0.000948283	0.000287715	0.0020465
7513	0.0538571	0.122052	0.000390762	0.0669704	0.0248957	2162.62	114.043	36.3798	844.552	35.6584	0.0538484	-0.407876	0.0903072	0.0340543	93.3991	1	17.0358	1.27861	0.0380802	2.11446	0.238736	0.0205246	1.30803	3.76121	0.761459	0.494234	0.199654	0.0339338	0.0231894	0.765456	0.315278	0.468791	0.06964	0.0111926	-0.000931564	0.00534607	0.456077	0.00810619	0.000977861	0.00567766	1.18058	0.00926609	1.1426	0.00183106	0.379103	6.37402e-05	0.00141746	0.00229044	0.00878764
7510	0.0530555	0.12732	9.3544e-05	0.0672823	0.0269652	2304.63	122.441	37.6383	908.886	37.6674	0.0668223	-0.292807	0.0498826	0.0290082	99.0473	1	17.6017	1.43276	0.0388666	2.25419	0.31053	0.0188562	1.3661	3.32537	0.743705	0.51009	0.223114	0.031449	0.0252053	0.86617	0.348534	0.511187	0.0757883	0.0131804	-0.000148734	0.00408045	0.487751	0.0141218	0.00721545	0.00499231	1.22813	0.009501	1.1986	0.00114738	0.406493	0	0.00139091	0.00295157	0.0090827
7511	0.053023	0.128046	0	0.0657844	0.0288874	2178.16	120.162	36.7876	853.904	35.571	0.0598278	-0.417271	0.113088	0.0331265	98.2181	1	17.2256	1.37071	0.0367381	2.13196	0.244586	0.0205983	1.3456	2.88156	0.74489	0.508506	0.205288	0.0317974	0.0218306	0.794272	0.331667	0.4774	0.0744231	0.00957514	-0.000902213	0.00366409	0.479664	0.0173375	-0.00321139	0.00607964	1.18074	0.00857652	1.16808	0.00145123	0.394702	0.000101092	0.00145579	0.00285257	0.00834683
7508	0.0240006	0.179346	0	0.069485	0.0310956	2942.84	145.018	43.7403	838.405	33.3246	0.0569563	-1.06856	-0.07033	0.0160806	110.753	1	18.5528	3.53855	0.0349227	2.00799	0.324008	0.0170747	1.44375	3.02972	3.75298	0.551911	0.242774	0.109265	0.0259253	0.948074	0.406099	0.57556	0.0960616	0.0115552	-0.00412302	0.00797137	0.467621	0.00332671	0.00351798	0.00764278	1.14364	0.00552213	0.83054	0.00113452	0.333358	3.04991e-05	0.00285395	0.0104762	0.0162423
7509	0.0237506	0.1835	-4.7001e-05	0.0778226	0.0290952	2829.24	138.872	43.6985	846.84	34.2492	0.0386307	-1.6564	-0.0288758	0.0250669	108.292	1	18.4428	3.46156	0.0321029	1.97329	0.396021	0.0212268	1.42163	3.88358	3.76589	0.555143	0.243304	0.104169	0.0255616	0.951492	0.397115	0.544074	0.0888351	0.0103408	0.000486285	0.0056411	0.454763	-0.0220839	-0.00478693	0.00600775	1.13325	0.00556848	0.825973	0.00142761	0.32548	6.14905e-05	0.00376062	0.0111554	0.0157263
[truncated: 43 more columns]

## Sheet: DING ATHO-G
file	NAI	Li(7)	Be(9)	B(11)	Ca2+(21.5)	Na(23)	Mg(24)	Al(27)	Si(28)	Si(29)	P(31)	S(33)	S(34)	Cl(35)	K(39)	Ca(43)	Ca(44)	Sc(45)	Ti(49)	V(51)	Cr(52)	Cr(53)	Mn(55)	Fe(56)	Fe(57)	Co(59)	Ni(60)	Ni(61)	Ni(62)	Cu(63)	Cu(65)	Zn(66)	Zn(67)	Ga(71)	Ge(73)	Ge(74)	As(75)	Se(77)	Br(79)	Rb(85)	Sr(88)	Y(89)	Zr(90)	Nb(93)	Mo(95)	Ru(101)	Rh(103)	Pd(105)	Ag(107)
7453	32.2437	0.649573	0.00820227	0.011554	0.00273621	1350.55	12.6737	2281.21	5155.91	223.083	0.31155	0.000892833	0.0233737	0.2047	1183.27	1	15.3176	0.328572	4.58889	0.366821	0.170796	0.0131172	41.0755	1279.41	25.3963	0.0824385	0.180094	0.00885628	0.00445793	0.387502	0.164789	0.291497	0.0890944	0.435431	0.00972846	0.0284977	0.012956	0.00121328	0.0100216	3.34992	6.01317	7.04329	19.9275	3.98083	0.0613613	-0.000694195	0.0101781	0.00148114	0.00357064
7454	32.042	0.6465	0.00851275	0.0126142	0.00207261	1385.88	12.882	2338.23	5336.23	230.772	0.299193	0.0114978	0.0324959	0.153211	1152.4	1	15.9091	0.314975	4.73326	0.410927	0.170998	0.0163573	42.1092	1254.66	25.9623	0.0896814	0.138082	0.00267385	0.0308236	0.420436	0.190347	0.306117	0.0768875	0.41398	0.0022939	0.0249906	0.00825388	-7.99977e-05	0.00215335	3.36333	6.11921	7.12213	20.5283	4.12499	0.0655111	0.000248265	0.0118882	0.00280842	0.00110777
7452	32.0048	0.708801	0.0220911	0.0145165	0.00202139	1405.58	13.1767	2400.37	5481.76	232.415	0.288827	-0.00268881	0.00725783	0.172437	1210.49	1	16.0804	0.357935	4.61964	0.385755	0.147114	0.009888	42.5347	1270.77	26.4032	0.0805016	0.116027	0.00783287	0.0200878	0.438104	0.178215	0.337665	0.0845255	0.433576	0.00628277	0.0165581	0.00853323	0.00235032	0.0124745	3.4804	6.1148	7.24648	20.4042	4.26054	0.0658518	-5.88661e-05	0.013321	-1.12178e-05	0.00201888
7459	31.6998	0.643406	0.00573036	0.0121473	0.00229235	1471.32	12.8925	2507.24	5603.63	231.729	0.325243	0.0276488	0.0330102	0.208574	1294.82	1	16.2449	0.313975	4.81317	0.405808	0.159306	0.0210275	42.9474	1392.81	26.0185	0.0953996	0.10361	0.00562619	0.0205297	0.415201	0.209765	0.322608	0.0930826	0.441473	0.0128837	0.024513	0.00918668	0.00276806	0.0174321	3.42801	6.11231	7.13375	20.532	4.12459	0.0712362	0.00134818	0.0141905	0.0044528	0.00269153
7458	31.6993	0.656835	0.0100894	0.0140117	0.00231859	1467.59	12.8769	2498.65	5599.68	229.522	0.321094	-0.0132406	0.0570522	0.223142	1248.21	1	16.1941	0.347596	4.78218	0.385939	0.160742	0.0243536	42.9679	1366.93	25.8724	0.106363	0.16521	0.000295373	0.0235654	0.38342	0.173095	0.339847	0.0867875	0.415942	0.0169962	0.0194538	0.0100035	0.00133943	0.0124644	3.41131	6.08066	7.21723	20.1177	4.13842	0.061989	0.00194994	0.0115668	-0.000709934	-0.000213896
7457	31.413	0.623597	0.0184522	0.0117527	0.00294324	1423.53	12.5841	2430.38	5488.33	219.909	0.281097	-0.00754886	0.0264697	0.163379	1179.45	1	15.8202	0.354877	4.63485	0.378872	0.147197	0.0236378	41.9422	1339.4	25.2168	0.0429484	0.144005	-0.00371954	0.0169269	0.388544	0.184769	0.317079	0.0868323	0.425218	0.00711839	0.0362553	0.00358155	0.00195733	0.0220801	3.32176	6.03036	7.21692	20.1346	4.14345	0.0950057	0.00215378	0.0134536	0.00266741	0.000827389
7456	29.2709	0.634676	0.0173377	0.0114422	0.000499994	1345.95	11.8688	2329.23	5288.21	210.091	0.307396	0.00891852	0.0549699	0.149603	1053.37	1	14.9059	0.299358	4.46218	0.394205	0.188286	0.0106878	39.8043	1263.49	23.9536	0.0465934	0.1086	0.00540312	0.0272763	0.356777	0.139061	0.294919	0.0742773	0.395904	0.0103775	0.023992	0.00989941	0.00165697	0.017597	3.18688	5.75566	6.81379	19.1516	3.85946	0.0927963	-0.000910624	0.0112503	0.000278328	0.00315447
7455	27.6744	0.630884	0.0143295	0.012288	0.00336651	1420.9	12.428	2376.8	5546.04	221.625	0.287665	-0.0195345	0.0214441	0.218668	1026.04	1	15.483	0.34423	4.632	0.39358	0.138803	0.0258766	41.0254	1368.72	24.7484	0.0812335	0.0963339	0.0038554	0.0297208	0.37493	0.157998	0.310584	0.0840946	0.418455	0.00848448	0.0286857	0.000230149	0.00361052	0.0249054	3.28539	5.92911	7.02255	19.7211	3.99727	0.0743578	-0.00143917	0.0189539	0.000729854	0.00158805
7467	10.923	0.737715	0.00853846	0.015268	0.00385474	1487.41	13.0038	2306.35	4888.34	205.78	0.389341	0.0181351	0.0139153	0.191696	1217.56	1	15.7861	0.332424	4.68775	0.389706	0.218827	0.0124276	40.2884	1273.68	24.524	0.0794792	0.121624	0.00623917	0.0160418	0.407233	0.180423	0.414828	0.100618	0.40095	0.00665223	0.0222718	0.0132644	0.00180798	0.0283267	3.52344	6.19683	7.1415	20.0936	4.12907	0.0864419	0.000132981	0.0108291	0.00187593	0.00263878
7465	10.7732	0.748063	0.0121102	0.0155458	0.00162207	1545.87	13.2843	2328.21	5136.36	208.818	0.41138	-0.00744851	0.0384493	0.186872	1248.92	1	16.3297	0.356837	4.82883	0.387439	0.229753	0.022758	41.7961	1313.64	25.7788	0.093127	0.134446	0.00487094	0.0137371	0.440084	0.19288	0.449956	0.100487	0.450853	0.00930075	0.0225809	0.0126438	0.00154473	0.0191381	3.6248	6.61471	7.60326	21.3474	4.43519	0.0907136	-0.000331938	0.0145492	0.00116166	0.00190986
7464	10.7328	0.733203	0.00633223	0.0154352	0.00249098	1466.93	12.4386	2221.66	4919.58	213.739	0.378889	0.0118222	0.0464801	0.141026	1202.48	1	15.5893	0.315414	4.67458	0.380178	0.190777	0.0129196	40.3184	1255.34	24.9332	0.0743664	0.137303	0.00883831	0.014071	0.384717	0.165377	0.408288	0.0895876	0.418738	0.0102531	0.0296861	0.00895823	0.00149141	0.0248095	3.42609	6.18391	7.16469	20.084	4.08747	0.0825753	-2.58587e-05	0.0123834	0.00140968	0.00120071
7463	10.6944	0.709915	0.0098845	0.016777	0.00278656	1521.95	13.09	2288.42	5093.95	211.284	0.423946	-0.00149632	0.058993	0.198658	1243.97	1	16.0559	0.327254	4.74566	0.374229	0.230321	0.021182	41.1861	1281.18	25.2684	0.0784592	0.147024	0.00473955	0.0247857	0.431132	0.176181	0.416842	0.101161	0.432454	0.0101072	0.0292944	0.00535598	0.000115081	0.0225479	3.61403	6.38881	7.46291	20.6262	4.2762	0.0864799	5.13484e-05	0.0108095	0.000484948	0.000790195
7466	10.6665	0.785932	0.0108706	0.0144854	0.00423829	1545.18	13.456	2373.88	5106.25	218.955	0.39977	0.00836408	0.0385386	0.174484	1289.57	1	16.3198	0.342335	4.84798	0.417823	0.212866	0.0181456	41.8156	1332.45	25.9225	0.0853391	0.141788	0.00399057	0.0145313	0.406552	0.176829	0.405835	0.110391	0.456455	0.00915871	0.0279273	0.0086804	0.0037067	0.0249027	3.68058	6.64792	7.69487	21.5652	4.3811	0.0806907	-5.97056e-05	0.00919845	-0.000736894	0.00222314
7462	10.3326	0.693662	0.00972891	0.0131356	0.00195335	1470.47	12.4772	2258.26	4878.88	198.529	0.381302	0.0118607	0.0526026	0.167462	1223.45	1	15.5241	0.333806	4.67046	0.40975	0.201626	0.011478	40.0239	1266.14	24.3333	0.0689316	0.131852	0.00412895	0.0240866	0.386675	0.1754	0.407155	0.0906087	0.428971	0.0116807	0.0196735	0.0116585	-0.00053292	0.0105041	3.54318	6.35228	7.42838	20.7718	4.21394	0.0952074	0.000201885	0.0115677	0.00101787	0.0002238
7461	10.2107	0.728184	0.00786163	0.0146639	0.00294536	1507.57	12.4801	2260.26	4857.21	199.171	0.391968	0.0175248	0.0248942	0.161475	1239.06	1	15.5751	0.334229	4.72966	0.385009	0.189768	0.0189997	40.3278	1265.89	24.4271	0.075912	0.154305	0.00857914	0.0225281	0.384727	0.166121	0.39694	0.0987712	0.390519	0.0112685	0.021313	0.0059217	0.000322793	0.0113761	3.57376	6.45374	7.60849	20.9147	4.25737	0.0863685	0.000341421	0.0149006	0.00176408	0.00194827
7460	10.1928	0.733516	0.012753	0.0199959	0.00274813	1550.11	13.1829	2399.54	5178.76	213.209	0.411338	0.00814793	-0.0151366	0.172059	1307.02	1	16.3952	0.334482	4.91934	0.412862	0.196267	0.0219763	42.6969	1336	25.6922	0.0782045	0.144187	0.00200677	0.0180782	0.437852	0.176846	0.437634	0.104163	0.448355	0.00926352	0.0279878	0.0122407	0.00268741	0.0341536	3.79868	6.87014	7.8328	21.7998	4.45977	0.0862391	-0.000416789	0.0153677	-0.000529953	0.00377301
7475	7.07763	0.721341	0.013108	0.028767	0.0039019	1511.07	13.4564	2252.18	5445.25	289.148	0.497647	0.0158946	0.0488023	0.179463	1193.11	1	15.9795	0.3374	4.63736	0.388099	0.201488	0.0196242	40.5686	1259.93	25.419	0.0676258	0.127085	0.00690576	0.024964	0.418989	0.180052	0.549907	0.0978459	0.429614	0.011821	0.0262811	0.0126209	0.00222892	0.020057	3.50949	6.3619	7.28482	20.2713	4.13465	0.0882959	-3.75544e-05	0.0104136	0.000963703	0.00204821
7474	6.94032	0.769095	0.0148669	0.0219598	0.00392255	1535.67	13.7438	2279.94	5657.31	291.229	0.542636	0.0101798	0.0600512	0.191041	1244.97	1	16.5467	0.354482	4.68784	0.42064	0.188847	0.0109121	41.6747	1271.9	25.7819	0.0725553	0.137035	0.00635298	0.0229726	0.432577	0.175745	0.543022	0.116182	0.431752	0.00828352	0.0224327	0.0112956	0.000304009	0.019552	3.61865	6.41032	7.39488	20.6266	4.19515	0.092357	-0.000146579	0.0142725	0.00202733	0.00150224
7473	6.55671	0.783709	0.0213848	0.025853	0.00472503	1548.91	13.7499	2312.76	5895.11	305.3	0.505433	0.00940388	0.0428481	0.185233	1208.45	1	16.2059	0.356322	4.71961	0.427563	0.228106	0.0146789	42.2204	1285.15	26.4717	0.0935582	0.150879	0.00505322	0.0223739	0.445794	0.19413	0.57998	0.107349	0.461833	0.0108219	0.0271161	0.0140836	0.00248223	0.0195732	3.63934	6.54065	7.2779	20.6404	4.36944	0.0896946	-0.000146967	0.014935	0.00171076	0.00391602
7472	6.3102	0.83656	0.0195418	0.0272103	0.00406945	1576.07	13.813	2370.33	6075.49	313.75	0.557887	0.0186039	0.081486	0.180235	1243.69	1	16.2129	0.365807	4.77398	0.39712	0.224846	0.0126433	42.7682	1348.48	26.6084	0.0810334	0.16847	0.00763632	0.0186335	0.443693	0.196624	0.592512	0.129245	0.442745	0.00832092	0.0315751	0.00904885	0.00244558	0.0262717	3.73189	6.61356	7.62116	20.9224	4.33763	0.08737	-0.000135875	0.0127393	0.00284412	0.00108284
7468	4.34713	0.76954	0.0116821	0.0235656	0.00566743	1509.86	12.3485	2167.93	5491.24	291.648	0.537962	0.0121811	0.0495736	0.161486	1209.46	1	15.2174	0.290482	4.51185	0.391844	0.200988	0.0151998	37.6714	1232.15	23.3173	0.07153	0.139456	0.00479232	0.0162864	0.384778	0.15486	0.598603	0.136654	0.412777	0.00847894	0.0222515	0.00786025	0.00413521	0.0296306	3.53773	6.19413	6.88939	18.9743	3.98931	0.0820188	0.000363348	0.0126316	0.00129339	0.00283383
7471	4.33114	0.802648	0.0168512	0.0274083	0.00457501	1606.4	12.5147	2217.54	5795.2	294.787	0.557417	0.0108244	0.0304058	0.189286	1257.53	1	15.9079	0.325594	4.65754	0.384593	0.209712	0.0193441	39.8092	1273.69	24.5351	0.0771747	0.126926	0.00850586	0.0212919	0.40925	0.177416	0.617482	0.136986	0.425423	0.00987261	0.0186184	0.0107584	0.00200254	0.0219919	3.67471	6.44787	7.04156	19.376	4.13765	0.0891518	-0.000950929	0.00950098	0.00219904	0.00223981
7469	4.30732	0.746668	0.0203255	0.0246313	0.00661665	1542.2	12.4604	2160.2	5717.31	281.148	0.549702	0.00442893	0.0697128	0.185643	1209.08	1	15.4708	0.31865	4.53552	0.399181	0.201831	0.0127721	38.9175	1232.53	23.7962	0.0738222	0.136211	0.00789136	0.0118645	0.393729	0.160561	0.595452	0.124116	0.406776	0.0137723	0.0242229	0.0103403	-0.00022055	0.0200009	3.4578	6.32695	6.9238	19.3918	4.09198	0.0875817	0.000152364	0.0123617	0.000514242	0.00343801
7470	4.30318	0.795312	0.0126064	0.0222459	0.00308789	1540.64	12.2759	2140.91	5640	291.773	0.572753	0.0139953	0.0393211	0.16004	1258.72	1	15.5405	0.319684	4.58492	0.381646	0.222344	0.0164215	39.5292	1248.2	24.1059	0.0854887	0.142968	0.00742627	0.0239813	0.425002	0.170981	0.635533	0.121965	0.403315	0.0120975	0.0208941	0.0175949	6.44193e-05	0.02892	3.58009	6.2652	6.89529	19.2015	4.0609	0.0841797	-0.000171936	0.00996558	0.00129001	0.00208067
7481	2.90918	0.809041	0.0204958	0.0387591	0.00633493	1611.32	13.5625	2147.02	6233.12	325.874	0.742713	0.00741517	0.101333	0.194833	1272.5	1	16.2639	0.316024	4.76822	0.380511	0.270237	0.0166759	41.3758	1300.12	25.6798	0.0873825	0.153679	0.00765665	0.0165991	0.426717	0.169334	0.731197	0.143982	0.493592	0.0136615	0.0298506	0.0126324	0.000532742	0.036603	3.77991	6.55263	6.97944	18.7766	4.14045	0.0734681	1.84031e-05	0.0126548	0.00119867	0.00415394
7483	2.86508	0.821898	0.0168681	0.0327321	0.0086469	1589.94	13.3068	2104.23	6111.15	316.108	0.713123	0.0109269	0.0815614	0.225516	1219.24	1	16.0783	0.311544	4.56387	0.368747	0.246863	0.0143317	39.3143	1276	25.1421	0.0836796	0.146428	0.00720183	0.0200113	0.438295	0.173184	0.766617	0.150654	0.461697	0.0144245	0.0341003	0.0168164	0.0017499	0.0325016	3.65902	6.39629	6.63101	18.5066	4.02274	0.0667278	-1.63718e-05	0.00839558	0.00178271	0.00250385
7480	2.85965	0.814603	0.0169105	0.0363943	0.00721403	1596.91	13.0199	2130.29	6190.03	319.153	0.685679	0.0113513	0.086196	0.221748	1213	1	15.5748	0.309228	4.53684	0.386204	0.265672	0.0180125	40.0202	1250.41	25.0421	0.0767743	0.130692	0.00635087	0.0209188	0.419885	0.176416	0.750109	0.149256	0.466253	0.0109425	0.0394463	0.0138681	0.000219587	0.0272692	3.67003	6.37678	6.52326	18.0575	4.0018	0.0761336	0.000164514	0.014478	0.00142664	0.00328163
7482	2.83456	0.816844	0.0202328	0.0357008	0.00846129	1565.31	13.4764	2143.69	6046.99	305.11	0.710348	0.0153819	0.0749032	0.202255	1191.16	1	15.8659	0.32362	4.53581	0.34297	0.250244	0.0194723	39.061	1219.01	25.0226	0.0751764	0.13785	0.00864417	0.0197229	0.420718	0.178427	0.803444	0.169365	0.475671	0.0159294	0.0258329	0.0151178	0.00256002	0.0327808	3.56368	6.34135	6.74576	18.6777	4.00386	0.0765579	-6.23627e-05	0.0145405	0.00161895	0.00330578
7479	2.7318	0.811885	0.0220811	0.0392165	0.0112286	1661.25	13.6224	2248.7	6522.34	323.959	0.710206	0.000230226	0.0527755	0.240791	1261.44	1	16.1991	0.339289	4.70481	0.402838	0.212257	0.0193698	41.0863	1305.5	25.9646	0.0805257	0.146536	0.0081892	0.0244751	0.456237	0.176396	0.760732	0.16602	0.493794	0.00948973	0.0340579	0.0184107	0.000960238	0.0234131	3.82691	6.60338	6.97161	19.2666	4.30831	0.0916748	7.57823e-05	0.0132317	0.000998363	0.00342537
7478	2.67402	0.872659	0.0175855	0.0374839	0.00836697	1657.85	13.3816	2204.34	6437.18	322.446	0.716349	0.0154758	0.0683304	0.191862	1278.76	1	16.0225	0.31666	4.68805	0.395651	0.240135	0.0121973	41.0733	1306.15	25.9248	0.0796122	0.139124	0.00489808	0.0194977	0.433758	0.177243	0.779707	0.153334	0.478124	0.0152658	0.0279304	0.015905	0.00224531	0.0373105	3.74093	6.51117	6.77908	18.9035	4.1307	0.0804647	-1.53293e-05	0.00863444	0.00209344	0.00397048
7477	2.67051	0.805159	0.0202564	0.0356625	0.00782302	1629.36	13.1077	2194.95	6360.31	327.494	0.696646	0.00699878	0.0617771	0.190385	1231.5	1	15.6162	0.31288	4.57855	0.401775	0.254501	0.0156633	39.9665	1255.13	24.9631	0.0812817	0.138643	0.00952475	0.0238181	0.426597	0.173035	0.755448	0.161718	0.471363	0.0135149	0.02634	0.0185868	0.00127249	0.0288122	3.62004	6.42067	6.8218	19.0053	4.06485	0.0892117	2.64242e-05	0.0126812	0.0012709	0.00297031
7476	2.57736	0.806178	0.0186698	0.0377114	0.00822838	1577.54	12.8446	2157.79	6189.34	313.374	0.700069	0.00288281	0.0691739	0.212601	1208.28	1	15.4639	0.329058	4.52122	0.377783	0.237424	0.0191774	39.1003	1255.53	24.3198	0.0763724	0.137924	0.00598964	0.0197804	0.407952	0.173315	0.705076	0.161161	0.449139	0.0096599	0.0248069	0.0159611	0.00218821	0.0374891	3.5761	6.37535	6.6411	18.5525	4.11847	0.0805466	-3.41882e-05	0.0206778	0.00247155	0.00291977
7489	0.981046	0.896211	0.0231205	0.0576154	0.0135615	1773.51	13.9112	2220.1	6292.09	319.238	0.885433	0.0121245	0.121217	0.24616	1359.57	1	16.08	0.294048	4.73457	0.282461	0.337474	0.0220713	43.8741	1360.68	27.4055	0.0795719	0.122561	0.00472012	0.01938	0.483843	0.199101	1.02828	0.242982	0.655267	0.0228907	0.0428692	0.0244407	0.000839689	0.0278587	4.21552	6.23469	5.4924	14.6467	3.97021	0.0539029	-0.000126581	0.0143742	0.00483194	0.00397671
7488	0.963685	0.872795	0.0234139	0.0582086	0.0179282	1783.46	14.1747	2244.46	6531.02	330.125	0.927103	0.0241804	0.0892702	0.258269	1381.47	1	15.9177	0.305141	4.66923	0.295554	0.38047	0.0189365	44.3054	1388.08	27.6683	0.0777822	0.140795	0.0054862	0.0200666	0.50945	0.218028	1.08413	0.253986	0.68962	0.0241176	0.0480136	0.0231452	-0.000251984	0.0422374	4.23812	6.29289	5.47967	14.9403	4.02107	0.0574178	-0.00019147	0.0203372	0.00453829	0.0065893
7487	0.961354	0.972834	0.0279962	0.0577832	0.0163501	1817.86	14.1795	2274.12	6510.66	345.733	0.996696	0.0203101	0.0966449	0.222182	1376.99	1	16.2584	0.318626	4.87139	0.300858	0.305262	0.0124608	45.114	1404.61	28.1591	0.0854787	0.134165	0.00460283	0.0182253	0.504077	0.211626	1.07462	0.244419	0.662837	0.027017	0.0315176	0.0251075	0.00478075	0.0297486	4.21588	6.37343	5.56955	14.9427	4.04991	0.0531332	0	0.0186667	0.0039595	0.00464285
7491	0.957221	0.966598	0.026428	0.0438155	0.018423	1772.24	13.6721	2192.64	6234.53	324.367	0.85008	0.00229945	0.06429	0.223859	1321.8	1	15.7578	0.296489	4.63263	0.271682	0.245924	0.0232466	43.2952	1346.7	26.7014	0.0771453	0.133978	0.00695987	0.0171043	0.512955	0.208044	1.10314	0.269763	0.656041	0.0252099	0.0353306	0.0184333	0.000448716	0.033687	4.17761	6.35647	5.54135	15.0229	4.02585	0.0530198	0.000152959	0.029765	0.00489884	0.00611403
7490	0.956384	0.914493	0.0254593	0.058641	0.0175166	1797.34	13.7943	2223.63	6281.56	318.596	0.874753	0.0111928	0.0883356	0.228402	1334.2	1	15.5999	0.2941	4.58866	0.298692	0.395525	0.020936	42.7182	1375.48	26.8428	0.0728251	0.13574	0.00637669	0.0232385	0.50792	0.198599	1.13012	0.258553	0.666191	0.0269974	0.0439203	0.0262315	0.0039378	0.0347195	4.13474	6.26278	5.41344	14.8604	4.00114	0.0659098	9.97056e-05	0.0226488	0.00422305	0.00482487
7485	0.955413	0.960567	0.0336475	0.0561088	0.0168594	1778.5	13.7251	2250.5	6442.84	332.335	0.863765	0.0293534	0.0839293	0.207797	1323.34	1	15.6787	0.307365	4.70164	0.287696	0.358486	0.0147596	42.8784	1344.97	26.5353	0.0821927	0.140436	0.00701886	0.0145424	0.50921	0.201009	1.05156	0.291091	0.636194	0.0306121	0.0310717	0.0199011	0.00273227	0.0381553	4.08184	6.4767	5.55095	15.1314	3.99013	0.056081	9.47866e-05	0.0221898	0.00353915	0.00474473
7486	0.945742	0.914186	0.0271512	0.0559974	0.021377	1757.72	13.8017	2179.38	6238.92	332.99	0.962812	0.0146658	0.104931	0.247492	1339.42	1	15.7114	0.298858	4.63535	0.276965	0.303792	0.0191871	43.8784	1364.54	27.5191	0.0741616	0.14673	0.00632584	0.0169022	0.526467	0.203084	1.07663	0.26547	0.690515	0.027098	0.0255148	0.0275612	0.000737633	0.0317846	4.08126	6.13407	5.41335	14.4143	3.94557	0.0550742	6.68295e-05	0.0256648	0.00430397	0.00437711
7484	0.940386	0.96851	0.0225208	0.0568052	0.0181683	1871.18	13.8485	2265.63	6565.88	336.647	0.883487	0.0106469	0.0926191	0.221991	1385.54	1	15.9846	0.3054	4.67897	0.358297	0.292289	0.015793	42.804	1437.1	27.073	0.0850752	0.148231	0.00641865	0.0216746	0.515279	0.217357	1.05716	0.274777	0.644071	0.0236183	0.0375907	0.0231026	0.00302094	0.0338213	4.20885	6.42538	5.52663	15.1482	4.06565	0.0753776	-3.4349e-05	0.0146656	0.00319571	0.00269838
7492	0.536173	1.18906	0.0271115	0.0770831	0.0219452	2127.61	16.0547	2484.94	6672.29	353.995	1.06268	0.027734	0.107506	0.235083	1521.65	1	16.6602	0.352705	4.82292	0.280878	0.474484	0.0238583	48.3869	1505.16	30.8734	0.0853663	0.145657	0.00699724	0.0178605	0.626498	0.230207	1.33851	0.365708	0.819699	0.0470174	0.049988	0.0420534	0.0115027	0.0347665	4.60482	5.97869	4.82835	12.8683	3.8548	0.0591811	0.000304965	0.0140063	0.00537556	0.00449589
7496	0.53579	1.12254	0.0298005	0.0742755	0.0224017	2108.89	15.2076	2376.52	6532.99	329.944	1.05421	0.0263148	0.10288	0.235191	1521.08	1	16.3532	0.326757	4.76434	0.257839	0.374307	0.0210298	48.222	1473.2	29.9938	0.0862866	0.152856	0.00798611	0.0198137	0.601751	0.224993	1.35469	0.330624	0.774783	0.0449131	0.0553088	0.0286716	0.00791218	0.044934	4.50214	5.90187	4.73496	12.6935	3.78562	0.0470364	0	0.0255739	0.00267292	0.00563295
7495	0.534686	1.18264	0.0316278	0.0758024	0.021342	2131.16	15.3167	2403.18	6550.07	345.455	1.07746	-0.00125274	0.0780559	0.24345	1538.76	1	16.783	0.346068	4.79118	0.273891	0.498544	0.0249219	47.9194	1537.63	30.2988	0.102006	0.151574	0.00574742	0.0258145	0.607207	0.231018	1.36045	0.366193	0.796717	0.0478379	0.0477289	0.0345285	0.00847077	0.0327863	4.63893	6.04456	4.86845	13.0405	3.81093	0.0525856	-7.4141e-05	0.0157411	0.00622221	0.00567827
7493	0.534599	1.18049	0.0319781	0.0767743	0.0201772	2161.58	15.8011	2468.19	6743.69	355.644	1.09506	0.0206397	0.067384	0.245127	1562.83	1	17.0008	0.373932	4.90618	0.296609	0.48051	0.0267767	49.3581	1564.91	30.9203	0.0841828	0.139914	0.00819477	0.0253942	0.626424	0.253731	1.41571	0.352369	0.831963	0.0430252	0.053531	0.0288162	0.0115704	0.0394866	4.67733	6.04066	4.8972	13.0977	3.95509	0.053786	2.81739e-05	0.0125044	0.00414456	0.00584952
7494	0.531505	1.20413	0.0329054	0.0755238	0.0220317	2206.61	15.6671	2499.99	6873.43	356.303	1.09872	0.030931	0.11908	0.273611	1566.23	1	17.0982	0.359486	5.0088	0.291856	0.47245	0.0203427	49.6552	1592.16	31.3085	0.0900102	0.152673	0.00897346	0.01868	0.618683	0.253027	1.37267	0.356673	0.839365	0.0448606	0.0461581	0.0451918	0.00677762	0.0434932	4.78811	6.14722	4.9733	13.2333	3.97186	0.0521844	-0.000104879	0.0189988	0.00350891	0.00674236
7497	0.525516	1.15322	0.034442	0.0670221	0.0237132	2132.41	15.2711	2404.03	6610.99	343.31	1.07519	0.0032901	0.0596566	0.285915	1548.19	1	16.526	0.333356	4.89663	0.268512	0.525747	0.0151899	48.6933	1535.36	30.4896	0.0970909	0.150918	0.00771272	0.0158786	0.641022	0.224724	1.38581	0.354153	0.81381	0.0384738	0.052523	0.033319	0.00640138	0.0421421	4.69174	5.99109	4.81424	12.9752	3.91399	0.056899	2.37219e-05	0.0227562	0.00383025	0.00963751
7498	0.512594	1.16095	0.0294858	0.0801057	0.0179344	2173.16	15.3991	2409.96	6685.14	329.19	1.05211	-0.00821731	0.0726309	0.22339	1563.23	1	16.7666	0.383768	4.86927	0.266627	0.517144	0.0211656	49.5045	1584.65	30.7813	0.0979267	0.147333	0.00578228	0.0207944	0.605683	0.243335	1.39224	0.357488	0.806677	0.0470392	0.048948	0.0363409	0.00354012	0.0498162	4.78394	6.14795	4.9432	13.0635	3.95896	0.0538573	-0.00010657	0.0256611	0.00460073	0.00661837
7504	0.369812	1.18338	0.0280619	0.0786023	0.0216557	2407.63	16.945	2541.47	6575.2	326.753	1.28801	-0.0308401	0.0757149	0.290081	1716.55	1	17.4733	0.413664	4.91662	0.280188	0.680967	0.0326641	53.2624	1658.26	33.8594	0.103681	0.173355	0.00774309	0.0226522	0.707333	0.269873	1.5724	0.391906	0.884532	0.0490087	0.058639	0.0413728	0.000199546	0.0524613	4.87737	5.32846	4.10992	10.5439	3.37583	0.0514451	0	0.0290611	0.0043421	0.00662192
7502	0.363349	1.36474	0.0373632	0.0864416	0.0256295	2565.06	17.9716	2650.89	6991.74	355.403	1.31243	-0.0358945	0.112601	0.304627	1785.01	1	18.0607	0.470859	4.95251	0.295003	0.557879	0.0270107	54.3405	1694.38	34.7801	0.100004	0.186606	0.01095	0.0335829	0.738218	0.255044	1.6285	0.421061	0.94353	0.0472957	0.0545857	0.0518346	0.00767671	0.0420912	5.09989	5.3515	4.10468	10.8232	3.4847	0.0554144	0.000164219	0.0222495	0.00600997	0.00688971
7503	0.363052	1.26044	0.037346	0.0842291	0.0194011	2461.32	17.5192	2589.16	6673.8	310.737	1.26884	-0.00430611	0.0859611	0.27026	1679.73	1	18.0057	0.447856	5.00227	0.274906	0.586142	0.0288012	54.275	1669.99	34.0951	0.103187	0.165228	0.00996422	0.026041	0.682755	0.267794	1.64534	0.4038	0.927311	0.0528366	0.0596722	0.0382339	0.00342396	0.0455645	4.73166	5.40392	4.18015	10.9615	3.42219	0.0534868	-1.6337e-05	0.0214037	0.00496142	0.00761134
7501	0.36027	1.24594	0.0309829	0.0979611	0.0169116	2505.14	17.5696	2560.15	6728.82	320.261	1.3037	-0.0402846	0.073778	0.280447	1706	1	17.4671	0.479355	4.87729	0.290315	0.632127	0.025955	54.0274	1659.34	34.4385	0.0922537	0.169842	0.00857876	0.0202432	0.682773	0.265822	1.54544	0.39189	0.859321	0.0420662	0.0535736	0.0482557	0.000670579	0.0524159	4.88668	5.3362	4.02148	10.3243	3.37708	0.0522754	-0.00016891	0.0235035	0.00587895	0.00664764
7500	0.355175	1.32541	0.0354843	0.0961069	0.0222931	2523.52	18.0637	2629.77	6885.13	343.479	1.39265	-0.0390151	0.124602	0.284207	1759.27	1	17.658	0.446497	4.76241	0.290805	0.55334	0.0305562	53.152	1651.73	34.2713	0.0944712	0.16992	0.00899368	0.0179183	0.719661	0.270002	1.63214	0.436598	0.966948	0.0542923	0.066574	0.0455178	0.0167537	0.0536626	4.86396	5.36863	4.12391	10.8928	3.42011	0.0498925	-8.8191e-05	0.0145169	0.00415094	0.00773223
7499	0.353291	1.44913	0.0328484	0.0911455	0.0307655	2617.86	18.6908	2708.91	7162.86	340.612	1.34057	0.015869	0.139359	0.301942	1710.08	1	18.1369	0.495008	4.87491	0.293255	0.568636	0.029485	55.0945	1682.74	34.5403	0.0987488	0.170499	0.00895137	0.0268693	0.773761	0.272401	1.58853	0.436139	0.934439	0.0582862	0.0641918	0.04294	0.0127277	0.0413279	4.946	5.47693	4.17391	10.9741	3.51665	0.0515994	0.000316741	0.0202136	0.00632406	0.00875177
7506	0.156518	2.17255	0.0423538	0.111125	0.0243141	3685.87	22.2273	3121	7153.61	308.737	1.55496	-0.647239	-0.0743789	0.222227	2242.17	1	22.3648	1.74796	4.8788	0.412627	1.20428	0.0566299	64.5085	2103.57	43.3248	0.134407	0.292788	0.0229643	0.044394	0.938027	0.360419	2.09684	0.469911	1.14717	0.0505181	0.069799	0.0575477	0.01099	0.0735018	5.84428	5.18102	3.49439	8.96032	3.08475	0.0775217	0.000204255	0.0385246	0.0199989	0.0173861
7505	0.155416	1.97993	0.044452	0.138428	0.0264209	3584.22	21.8479	3037.76	7011.63	299.228	1.54713	-0.374787	0.0051435	0.259807	2214.07	1	22.0887	1.63387	4.72989	0.327561	0.846059	0.0391795	63.4926	2088.68	41.2854	0.117795	0.286817	0.0190061	0.0389414	0.895503	0.36545	2.09864	0.485312	1.04733	0.0557759	0.0823319	0.0430704	-0.0195354	0.0782813	5.81773	5.1712	3.48318	8.80782	2.98254	0.0605504	-0.000126137	0.0216307	0.0201153	0.0133516
7507	0.153344	2.1049	0.050175	0.114381	0.0271052	3707.25	22.8676	3187.1	7224.89	311.28	1.64082	-0.662254	0.0994979	0.286487	2238.92	1	23.2875	1.64123	4.96429	0.409738	1.03923	0.0356917	67.516	2123.28	44.0046	0.111181	0.282449	0.0179095	0.0381739	0.998787	0.366224	2.19851	0.490379	1.1189	0.0608479	0.0634443	0.0472737	-0.00307542	0.0444693	5.96081	5.3346	3.65451	9.21264	3.09719	0.0807389	0	0.0226265	0.0246868	0.0151252
7513	0.0538571	3.01416	0.0637443	0.117747	0.025639	4660.64	27.4093	3620.23	6256.85	270.661	1.57326	-2.79662	-0.755678	0.275877	2574.86	1	31.2896	9.55543	4.14573	0.391981	1.71782	0.0570582	74.2442	2361.61	48.9349	0.164964	0.558648	0.0761639	0.0687563	1.14526	0.429604	2.26885	0.520648	1.18194	0.0606495	0.0549557	0.0348928	-0.0321677	0.0322541	6.37951	4.76776	2.57284	6.4687	2.25925	0.0559089	0.000356617	0.0225137	0.152933	0.0534837
7510	0.0530555	2.92268	0.0605759	0.11752	0.0194452	4694.35	27.362	3613.84	6040.41	262.151	1.76968	-0.771985	-0.314679	0.276557	2490.17	1	32.2766	10.131	4.03742	0.386412	2.48902	0.0684542	71.0363	2371.28	47.9358	0.16522	0.545953	0.0918056	0.082428	1.10513	0.430129	2.4128	0.538811	1.171	0.0432431	0.0663736	0.0328269	-0.0132456	0.0868359	6.11014	4.81252	2.53489	6.35297	2.18456	0.0573087	0	0.0302357	0.142474	0.0480465
7511	0.053023	2.70805	0.046396	0.10837	0.0244898	4448.42	26.1466	3473.64	5903.04	252.284	1.64382	-4.22088	-0.213797	0.20523	2458.03	1	30.7573	9.63038	3.85446	0.338055	1.67866	0.0583989	68.0651	2176.23	45.6595	0.159906	0.508446	0.0786731	0.0684919	1.05879	0.445502	2.21387	0.437957	1.07081	0.0399867	0.0456129	0.0520595	-0.036051	0.0422164	5.92856	4.49906	2.4897	6.04116	2.10346	0.0632533	0.000625202	0.0341235	0.140228	0.0508538
7508	0.0240006	3.9267	0.0558577	0.111282	0.01774	5643.17	31.2846	3943.59	5362.02	224.777	1.42912	-22.0511	-0.983222	0.125104	2647.39	1	37.3666	24.1238	3.25298	0.31228	3.32347	0.085914	71.5439	2253	48.7598	0.16876	0.462538	0.189188	0.0730729	1.34658	0.503436	2.53244	0.576319	1.1623	0.107401	0.0581978	0.0355223	-0.302523	-0.0638452	5.55973	4.02956	1.6162	4.14036	1.55348	0.0541895	0.000539399	0.023051	0.310999	0.0925458
7509	0.0237506	3.90226	0.071288	0.111678	0.0254893	5578.35	30.568	3937.14	5315.8	225.965	1.58456	9.1479	0.258667	0.194165	2566.88	1	36.413	23.7324	3.25244	0.297377	3.26311	0.0907073	71.9892	2281.45	49.5914	0.175309	0.458396	0.164909	0.0717693	1.30807	0.452226	2.53418	0.53867	1.10725	0.0317933	0.047719	0.0395824	0.146658	0.043918	5.65495	3.9836	1.64689	4.03556	1.52019	0.0560139	0	0.0435154	0.292208	0.0880941
[truncated: 43 more columns]

## Sheet: USGS BHVO-2G
file	NAI	Li(7)	Be(9)	B(11)	Ca2+(21.5)	Na(23)	Mg(24)	Al(27)	Si(28)	Si(29)	P(31)	S(33)	S(34)	Cl(35)	K(39)	Ca(43)	Ca(44)	Sc(45)	Ti(49)	V(51)	Cr(52)	Cr(53)	Mn(55)	Fe(56)	Fe(57)	Co(59)	Ni(60)	Ni(61)	Ni(62)	Cu(63)	Cu(65)	Zn(66)	Zn(67)	Ga(71)	Ge(73)	Ge(74)	As(75)	Se(77)	Br(79)	Rb(85)	Sr(88)	Y(89)	Zr(90)	Nb(93)	Mo(95)	Ru(101)	Rh(103)	Pd(105)	Ag(107)
7453	32.2437	0.015924	-0.000145174	0.00120086	0.00195954	108.912	176.762	385.13	540.19	23.7684	0.41338	-0.000183559	0.00369987	0.0151261	30.376	1	15.3536	0.266832	7.73219	2.74016	1.94629	0.22748	10.3474	658.228	13.1073	0.319165	0.181829	0.00937966	0.0212437	0.429043	0.196097	0.0552026	0.0130769	0.0681687	0.00195598	0.00398541	0.000341525	-0.000143254	0.000816353	0.0766176	3.59936	0.269938	0.940689	0.176966	0.00758828	5.88278e-05	-4.50269e-05	7.32351e-05	0.00137265
7454	32.042	0.0167934	0.0011841	0.00110876	0.00255327	108.321	178.234	403.951	543.661	24.0759	0.419483	-0.000174148	0.00326081	0.0211854	28.8896	1	15.5772	0.275432	7.73142	2.82387	1.98561	0.229929	10.5339	662.347	13.0774	0.318155	0.179819	0.00761134	0.0266755	0.427383	0.191975	0.0589837	0.0133112	0.0684776	0.00137189	0.00359135	0.000940189	-0.000253446	0.000347078	0.0842049	3.69947	0.268703	0.973513	0.190822	0.00713339	-0.000111838	0.000233488	7.62996e-05	0.000520622
7452	32.0048	0.0169154	0.000783928	0.00129746	0.00205974	115.308	186.643	389.11	558.888	24.7949	0.432743	0.000373153	0.00698944	0.0154243	30.5203	1	15.8716	0.275912	7.9971	2.79973	2.06814	0.242443	10.687	683.223	13.4945	0.319887	0.177435	0.00693498	0.0276453	0.45082	0.20583	0.0584626	0.0149639	0.0691603	0.000636593	0.00399933	0.000567808	0.000154932	0.000634473	0.0797901	3.81174	0.284264	1.00511	0.195052	0.00977094	0.00051592	0.000172498	9.17959e-06	0.00147003
7459	31.6998	0.014565	-5.98796e-06	0.000831478	0.00223753	112.73	187.933	392.314	551.703	22.9592	0.427539	0.00135802	0.00446739	0.0160225	29.4463	1	15.5018	0.269479	7.69845	2.74814	1.97381	0.232498	10.4205	694.165	12.7671	0.309319	0.170066	0.00694055	0.0265702	0.397146	0.188818	0.053339	0.0118551	0.0613694	0.00152886	0.00453162	0.00136621	0.000133048	0.00155458	0.0729998	3.58898	0.274796	0.947001	0.185938	0.00521364	-1.9036e-05	-0.000234105	-9.8216e-05	0.000241808
7458	31.6993	0.0132352	-2.60221e-05	0.00172224	0.0023102	113.826	182.505	407.388	564.258	23.3186	0.418038	0.000288309	0.0016988	0.0125963	29.4533	1	15.3577	0.268092	7.71157	2.76118	1.98331	0.234063	10.4525	713.376	13.2252	0.301191	0.172638	0.00748491	0.0245572	0.407137	0.188403	0.0552074	0.012532	0.0647364	0.000608975	0.00272996	0.00113473	-0.000153578	0.000415034	0.0805896	3.68977	0.268184	0.978324	0.184278	0.00664138	0.000294472	0.000141348	-0.000272565	0.00124047
7457	31.413	0.0128206	0.000433835	0.00120369	0.0019379	111.614	191.081	401.627	560.661	23.2441	0.414801	0.00144448	0.00319072	0.0136535	28.7297	1	15.3776	0.259272	7.76516	2.73881	1.9799	0.236381	10.3848	705.993	12.8229	0.300928	0.176991	0.00594698	0.0272129	0.406255	0.184535	0.0569372	0.0118955	0.0636648	0.00121252	0.00263998	0.00139483	6.89895e-05	0.00181811	0.0762129	3.6015	0.271141	0.965563	0.186529	0.00593776	0.000444583	0.000291999	-1.85523e-05	0.00101183
7456	29.2709	0.0142628	0.000395863	0.00151822	0.00220177	114.757	183.828	400.973	580.786	23.2201	0.416702	0.00232437	0.0038069	0.015865	26.084	1	15.3823	0.257761	7.68221	2.73785	1.9642	0.237609	10.5143	708.767	12.9238	0.296841	0.16277	0.00875001	0.0265303	0.414838	0.189258	0.0540782	0.0115657	0.0679681	0.00105678	0.00345029	0.000707946	-7.64617e-05	-0.00108034	0.0854007	3.61158	0.271747	0.933889	0.186137	0.00769036	-0.000256606	-8.9832e-05	0.00027084	0.00110343
7455	27.6744	0.0156615	0.000411085	0.000931961	0.00200379	116.14	191.362	401.106	582.059	23.9521	0.423585	-0.000636206	0.00529974	0.0262461	24.6197	1	15.3272	0.259362	7.69685	2.77307	1.97034	0.226185	10.5269	715.471	12.9777	0.308915	0.172968	0.00983135	0.0287566	0.419544	0.188776	0.0528912	0.0131989	0.0708491	0.00100019	0.00331231	0.00130184	0.000166694	0.00263802	0.0772518	3.59442	0.263803	0.952366	0.191674	0.00854286	0.000151034	-0.000347925	-0.000228589	0.00130921
7467	10.923	0.0157177	0.000314864	0.00136376	0.00225578	118.324	187.168	383.565	501.833	21.404	0.577175	0.00234685	0.00372779	0.0197865	34.9294	1	15.2007	0.259383	7.77209	2.77755	1.93346	0.222396	9.96086	651.867	12.6681	0.310686	0.172615	0.00863862	0.024385	0.408444	0.189127	0.0672291	0.0161605	0.0620737	0.000996094	0.00336809	0.000988223	1.3725e-05	0.00124292	0.0739381	3.92563	0.2747	0.955419	0.19813	0.00809148	0.000192031	0.000113802	8.25074e-06	0.000936052
7465	10.7732	0.0170288	0.000465708	0.0016155	0.00360549	117.144	183.358	373.917	500.581	20.9049	0.562833	-0.000942706	0.00711185	0.0170183	36.2904	1	15.214	0.257417	7.64537	2.72947	1.89204	0.219719	9.92919	657.068	12.3389	0.307102	0.172485	0.00778282	0.0264884	0.419114	0.199071	0.0745821	0.0143055	0.064154	0.00134405	0.00422929	0.00111542	0.00029069	0.00304734	0.0749773	3.85371	0.277802	0.989664	0.1876	0.00751839	0.000116418	4.72108e-05	7.69285e-05	0.000648342
7464	10.7328	0.0197414	0.000326946	0.00131105	0.00268681	116.269	175.966	385.003	501.737	21.1593	0.565784	0.00193121	0.00734808	0.018192	36.602	1	15.1991	0.26101	7.70339	2.74538	1.92132	0.219094	10.0212	649.371	12.4199	0.316684	0.169195	0.00750055	0.0247021	0.426284	0.190711	0.0719877	0.0133391	0.0607801	0.00126591	0.00450646	0.00205966	0.000225806	0.00179968	0.0757685	3.79303	0.27854	0.996728	0.192844	0.0071374	0.000357065	0.000141736	-5.61775e-05	0.00124663
7463	10.6944	0.0157199	0.000606808	0.000971256	0.00234932	115.667	180.429	366.709	490.315	20.6136	0.553969	-0.000550806	0.00690188	0.017833	35.7803	1	15.2335	0.266063	7.71234	2.70874	1.91054	0.216815	9.82092	644.784	12.1122	0.301634	0.165571	0.00855976	0.0225727	0.395823	0.1929	0.068705	0.0154772	0.0639359	0.00105161	0.00444644	0.00115453	0.000258996	0.00272639	0.0778183	3.79145	0.277519	0.959837	0.189329	0.00730583	0.000143523	-4.24684e-06	8.05512e-05	0.00093643
7466	10.6665	0.0165932	0.00079606	0.00129249	0.00289388	113.764	177.124	363.231	486.277	20.456	0.545694	0.000627757	0.0074602	0.0166179	32.1878	1	14.9735	0.258456	7.58162	2.69953	1.87644	0.21646	9.75017	630.786	12.102	0.300208	0.166729	0.00861748	0.0257636	0.395467	0.181047	0.0777884	0.0162033	0.0622169	0.00112897	0.00359634	0.00102119	0.000158371	0.00330022	0.0785234	3.83834	0.280062	0.966966	0.189443	0.00662666	-5.69899e-05	-1.70717e-05	0.000107431	0.00140872
7462	10.3326	0.0160097	0.000310354	0.00102105	0.00315698	114.123	176.132	365.075	478.345	19.9627	0.559724	-0.00130953	0.00830517	0.0177777	28.74	1	15.2058	0.262753	7.63052	2.69285	1.91517	0.215833	9.6408	650.68	11.8492	0.294028	0.163315	0.00841251	0.0242239	0.375524	0.18168	0.0710606	0.0152411	0.0637799	0.00118787	0.00354066	0.000736289	7.09841e-05	0.00102569	0.0772838	3.79014	0.274687	0.97131	0.198496	0.00800875	6.25008e-05	0.000204112	0.000155012	0.00120746
7461	10.2107	0.0142677	0.000453459	0.001739	0.00307562	118.723	183.776	374.754	506.035	20.8038	0.587268	0.00174547	0.00148972	0.0179073	29.5741	1	15.5165	0.261294	7.92421	2.80567	1.89744	0.215502	9.9603	645.935	12.1786	0.307001	0.167491	0.00711047	0.0268113	0.38854	0.181456	0.0687228	0.0144505	0.0622245	0.000918519	0.00331823	0.00110087	-0.000168731	0.00162987	0.0752665	3.95945	0.285918	0.993781	0.193727	0.00889215	0.000365055	1.73414e-05	-1.5823e-05	0.000835934
7460	10.1928	0.0162765	0.000754259	0.00118252	0.0027604	115.184	180.89	367.704	504.678	20.5048	0.572136	0.00281539	0.00525251	0.0203469	29.3211	1	15.4278	0.257721	7.67233	2.8066	1.90052	0.219862	9.82956	646.487	12.1438	0.302864	0.164205	0.00814041	0.0242933	0.404406	0.18797	0.0711336	0.0168212	0.061797	0.00064149	0.00371035	0.00104841	-7.57556e-05	0.00265788	0.0808398	3.94967	0.283572	0.986317	0.192554	0.00838335	-8.76366e-05	0.000245084	-0.000115059	0.00062248
7475	7.07763	0.0182665	0.000595842	0.00254133	0.00406225	120.039	187.081	367.675	553.516	23.479	0.687747	0.0029568	0.0116157	0.0168368	35.9274	1	14.9542	0.254735	7.41466	2.66271	1.89308	0.227101	10.0935	636.744	12.6063	0.315236	0.180686	0.00671549	0.0254204	0.411227	0.198533	0.0882971	0.0163325	0.0635504	0.0012071	0.00327754	0.00069601	0.000413576	0.00235667	0.0779039	3.7731	0.264511	0.921643	0.187873	0.00621722	0.0001385	1.88706e-05	0.00014033	0.00147314
7474	6.94032	0.0183818	0.00068245	0.00297056	0.00339725	119.624	181.789	368.794	557.503	23.8	0.706876	0.00056771	0.00836747	0.0213633	35.1425	1	15.1804	0.259749	7.55503	2.68783	1.89792	0.218291	10.122	652.31	12.5731	0.319132	0.174877	0.00882842	0.0241664	0.406332	0.201061	0.0942153	0.0186126	0.0636636	0.0014114	0.00371828	0.00092103	6.79298e-05	0.00280483	0.0796341	3.82738	0.26764	0.943487	0.188028	0.00774243	7.29228e-05	9.08595e-05	8.84301e-05	0.0017854
7473	6.55671	0.0179944	0.000858563	0.00246767	0.0038619	119.385	189.547	377.906	578.181	24.3951	0.700859	0.00628739	0.0068987	0.020745	34.2085	1	15.3181	0.264336	7.60596	2.69997	1.91551	0.219517	10.404	667.653	12.7694	0.325791	0.181418	0.00776359	0.0256002	0.427209	0.196503	0.0919972	0.0164023	0.0634609	0.00114367	0.00464042	0.0014063	0.000214389	0.00252017	0.0769068	3.98436	0.280046	0.964322	0.188034	0.00796298	1.27858e-05	0.000157094	-4.09846e-05	0.00158305
7472	6.3102	0.0183932	0.000911223	0.00274278	0.00375247	118.331	183.274	375.061	604.195	25.2913	0.697485	0.0039263	0.0125601	0.0225604	35.1312	1	15.1561	0.262834	7.52534	2.71298	1.92012	0.224033	10.2198	679.212	12.7352	0.324649	0.179742	0.00674572	0.0271456	0.427664	0.197849	0.0980268	0.0182438	0.0678092	0.00182218	0.00401495	0.0013238	-9.58716e-05	0.00337549	0.0779714	3.86586	0.272393	0.964301	0.186221	0.00742742	9.1456e-05	1.45394e-05	-1.55319e-05	0.00170634
7468	4.34713	0.0199418	0.00103204	0.0023284	0.00477898	123.512	180.414	356.323	567.274	23.1923	0.866253	0.00240102	0.00727009	0.0192697	36.2384	1	15.1773	0.241778	7.54552	2.69161	1.82032	0.202097	9.66777	622.215	11.7618	0.295268	0.162609	0.00668178	0.023238	0.387545	0.187556	0.105729	0.0203437	0.063399	0.00101106	0.00239919	0.0016878	0.000262129	0.00296912	0.0786708	3.86294	0.260497	0.903739	0.183366	0.00765955	0.000166781	0.000148293	5.134e-05	0.0016534
7471	4.33114	0.0170267	0.00105946	0.00287685	0.00478019	121.095	180.772	357.177	575.712	23.2869	0.845585	0.00116138	0.00751148	0.0154968	37.3311	1	15.0303	0.246598	7.49221	2.66994	1.82916	0.210859	9.67854	647.887	11.9161	0.311314	0.162714	0.00806625	0.0235762	0.387528	0.179161	0.108284	0.0205839	0.0643429	0.00105278	0.00359894	0.00173281	0.000271888	0.00169126	0.0793632	3.83032	0.260224	0.898377	0.182391	0.00693483	0.000279025	-3.89821e-06	-1.30705e-05	0.00135064
7469	4.30732	0.0189282	0.000530938	0.0021266	0.00419995	123.745	182.454	350.616	568.95	23.2624	0.879579	0.00183023	0.00699487	0.0186873	36.3721	1	15.046	0.235922	7.50742	2.6122	1.79284	0.209623	9.77844	638.714	12.0258	0.30626	0.157163	0.00719272	0.0251309	0.388294	0.178136	0.107377	0.0203459	0.0621628	0.00061001	0.00347979	0.000884547	0.000373358	0.00357765	0.0764757	3.90001	0.256325	0.893677	0.178861	0.00686176	0.000253839	3.92915e-05	2.74909e-05	0.00119134
7470	4.30318	0.0203671	0.000853116	0.00278908	0.00430084	121.012	187.404	356.871	571.771	23.2892	0.853038	-0.00071629	0.00889815	0.0149946	35.5663	1	14.866	0.243211	7.38212	2.71977	1.83863	0.207238	9.80405	637.662	12.1644	0.302309	0.170535	0.00833192	0.0253529	0.3938	0.184227	0.115722	0.0208973	0.06859	0.00135391	0.00324794	0.00127112	0.000453928	0.00228214	0.0796353	3.88364	0.251083	0.903388	0.185331	0.00792388	8.22545e-05	2.04919e-05	0.000205423	0.00159945
7481	2.90918	0.0189283	0.000826584	0.00346695	0.00689517	126.672	184.819	352.906	616.613	28.3726	1.02558	0.00182497	0.0115311	0.0250925	35.4764	1	15.2605	0.241895	7.63127	2.7153	1.78549	0.217122	9.76002	637.265	12.4453	0.315753	0.172296	0.00733747	0.0239592	0.390167	0.189765	0.117374	0.021037	0.0703049	0.00116734	0.00467251	0.00132272	0.000148346	0.00307159	0.0774137	3.94501	0.254172	0.871586	0.180861	0.00713211	7.69022e-05	8.00922e-05	1.44392e-05	0.0021453
7483	2.86508	0.0196155	0.00115548	0.00401995	0.00684988	122.594	183.203	336.305	610.914	27.3613	1.02231	0.00243608	0.0130127	0.0230793	35.8523	1	15.0282	0.236268	7.38665	2.6411	1.75969	0.209414	9.6925	636.882	12.3336	0.305682	0.175864	0.00810551	0.0243868	0.419131	0.189706	0.127864	0.0240539	0.0687939	0.000894467	0.00391883	0.00114407	0.000204898	0.00170918	0.0787153	3.82619	0.247491	0.863153	0.177645	0.00675538	7.41777e-05	0.000244012	4.15358e-05	0.00186503
7480	2.85965	0.0194801	0.000951444	0.0034225	0.00757476	126.066	189.233	350.588	614.023	28.3237	1.01349	-0.00110788	0.0122516	0.0209984	35.3974	1	15.165	0.235254	7.55428	2.64438	1.75718	0.208944	9.84302	638.632	12.6508	0.319357	0.173831	0.00763295	0.0261363	0.40222	0.198021	0.129803	0.0235813	0.0707548	0.00132952	0.0048137	0.0016113	0.000435752	0.00296674	0.0776205	3.84973	0.250604	0.870473	0.180041	0.00718603	0.000132235	0.000150135	3.08719e-05	0.00132356
7482	2.83456	0.0200377	0.000763873	0.00335392	0.00681389	126.902	185.19	353.702	613.712	28.5286	1.01452	0.00253168	0.0116155	0.0187555	34.3453	1	14.9314	0.236073	7.27516	2.65248	1.75526	0.204185	9.77415	643.642	12.431	0.308971	0.178418	0.00828067	0.0244315	0.419626	0.198816	0.130071	0.0264846	0.0739334	0.00097254	0.00459923	0.00238713	0.000332292	0.00318428	0.0812138	3.89967	0.250122	0.871183	0.182458	0.00773655	5.35103e-05	0.000126774	1.49493e-05	0.00208391
7479	2.7318	0.0195719	0.00114058	0.00362936	0.00747726	130.568	194.431	365.134	649.875	27.2183	1.01749	0.004691	0.0144374	0.0196176	36.6765	1	15.271	0.240936	7.52462	2.69669	1.78734	0.207232	10.0228	671.828	12.4052	0.312472	0.176628	0.0086981	0.0269759	0.408119	0.193097	0.131766	0.023936	0.0671998	0.00132163	0.00417163	0.00153894	4.67085e-06	0.00385729	0.0821485	4.0019	0.263862	0.900705	0.186588	0.00814123	0.000171377	0.000148168	0.000253788	0.00205662
7478	2.67402	0.0187545	0.00128518	0.00373714	0.00783224	125.709	192.8	365.407	633.22	29.8019	1.01505	0.0038696	0.0133584	0.0208142	34.441	1	14.9624	0.23803	7.47356	2.65009	1.81022	0.206795	9.99782	654.42	12.4586	0.304015	0.172282	0.0084436	0.0264406	0.404264	0.194978	0.125841	0.024343	0.0715358	0.00126634	0.0047994	0.00168907	0.000215579	0.0041231	0.0837469	4.04072	0.259805	0.902521	0.186659	0.0077938	0.00010271	4.26795e-05	0.000313428	0.00162142
7477	2.67051	0.0186518	0.00119278	0.00347866	0.00799099	122.06	192.518	356.985	637.037	30.2122	1.00893	0.000493561	0.0116472	0.0191713	33.0947	1	14.9712	0.226768	7.3288	2.61434	1.75551	0.199333	9.96931	667.798	12.3455	0.297541	0.164925	0.00811926	0.02491	0.388577	0.191378	0.131207	0.025717	0.0677684	0.00165288	0.00450046	0.000737191	0.000365213	0.00210149	0.0804852	3.83297	0.246332	0.864722	0.183741	0.00687632	0.000166782	0.000126891	0.000278568	0.00192484
7476	2.57736	0.020161	0.00091878	0.00420693	0.00895548	131.628	195.175	363.39	642.314	29.8685	1.02397	0.00211819	0.00933409	0.0248713	35.9761	1	15.1562	0.236526	7.45411	2.69561	1.7807	0.205982	9.8694	672.832	12.4191	0.307918	0.176092	0.00864504	0.024023	0.417769	0.192232	0.130672	0.0246438	0.0694769	0.0014664	0.00553714	0.00142001	0.000151872	0.00221825	0.0789931	4.01119	0.257966	0.896579	0.189249	0.00722392	0.000369368	0.000116504	0.000212613	0.00197921
7489	0.981046	0.0208784	0.00139903	0.00510744	0.0182085	130.622	194.521	347.768	610.776	27.1728	1.23194	0.00229474	0.0146329	0.0212626	36.0489	1	14.9809	0.191217	7.23291	2.61508	1.78702	0.206797	10.5015	670.083	13.0576	0.321555	0.181642	0.00808602	0.0262088	0.426351	0.211154	0.154262	0.0303996	0.0853705	0.00272726	0.00518143	0.00296893	0.000328104	0.00241379	0.0863563	3.85879	0.196704	0.643802	0.172528	0.00750498	0.000175902	0.000140326	6.79998e-05	0.00290712
7488	0.963685	0.0194383	0.00136653	0.00415497	0.0179159	132.531	195.33	353.199	611.376	27.2386	1.21735	0.00227604	0.0158845	0.0224609	37.0564	1	14.6367	0.193041	7.1699	2.63742	1.80051	0.213177	10.4599	665.29	13.0862	0.326838	0.184703	0.00878889	0.0265757	0.429637	0.205632	0.15535	0.0300376	0.0840668	0.00247135	0.00476531	0.00211048	-0.000215763	0.00366576	0.0876277	3.8844	0.196049	0.650706	0.165482	0.00763577	9.96475e-05	0.000131678	0.000134764	0.00199234
7487	0.961354	0.0206912	0.000719255	0.00463653	0.0167972	128.231	193.387	351.317	603.698	27.1678	1.23739	0.00183108	0.0141661	0.0235123	37.8198	1	14.4751	0.195615	7.1067	2.6031	1.82842	0.20816	10.4104	677.437	13.0639	0.32178	0.177774	0.00726893	0.0259934	0.418922	0.212955	0.156168	0.0314763	0.0818821	0.00210327	0.00467451	0.00162744	0.000697915	0.00310757	0.085556	3.82307	0.193666	0.646323	0.166949	0.00697398	0.000156443	0.000163909	0.000254837	0.00201885
7491	0.957221	0.0202828	0.00114635	0.00482684	0.015896	133.666	203.029	361.117	620.357	26.4471	1.24672	0.00160912	0.0138264	0.0224883	36.3191	1	14.8285	0.196164	7.29964	2.66064	1.8321	0.207746	10.5586	677.383	13.1918	0.316645	0.181236	0.00813585	0.0269612	0.458402	0.212962	0.168821	0.0330547	0.0841022	0.00239955	0.00436385	0.0019664	9.52807e-05	0.00290359	0.0872136	3.97543	0.203266	0.69546	0.171108	0.00764166	0.000162842	6.40548e-05	0.000305875	0.00246073
7490	0.956384	0.017773	0.000818568	0.00501845	0.0166755	135.733	196.45	352.032	611.177	27.6313	1.23019	0.00310879	0.00909539	0.0241554	36.658	1	15.0142	0.203442	7.20048	2.6271	1.83691	0.208968	10.5361	681.272	13.213	0.323642	0.184398	0.00776809	0.0266562	0.451794	0.212046	0.168024	0.0347066	0.0865186	0.00244889	0.00533659	0.00243427	0.000302665	0.00266167	0.088359	4.00236	0.198098	0.677866	0.176772	0.00792133	0.00011738	0.000122406	0.000138468	0.00200799
7485	0.955413	0.0213864	0.000787212	0.00558292	0.0183635	137.481	200.975	359.061	645.827	29.5666	1.25093	0.00225867	0.0158772	0.0199662	38.2389	1	14.793	0.193161	7.22355	2.6012	1.80184	0.213252	10.403	696.712	12.9421	0.31473	0.173091	0.00746031	0.0256039	0.451971	0.209403	0.167361	0.0349622	0.0828338	0.00233585	0.00408633	0.00155484	0.000651753	0.00402698	0.0860536	3.93101	0.199285	0.674564	0.173708	0.00771435	0.000151108	0.000171865	0.000178718	0.0023607
7486	0.945742	0.0198211	0.00108691	0.00554966	0.0179088	130.749	195.732	344.826	612.891	28.1499	1.22395	0.00123624	0.0203503	0.0234742	35.5016	1	14.7704	0.19188	7.11613	2.6051	1.80899	0.206504	10.3966	671.142	13.1164	0.321932	0.1811	0.00871564	0.0273663	0.45029	0.206314	0.162858	0.0333145	0.0861165	0.00232735	0.0048245	0.00302107	4.65906e-06	0.00398581	0.086908	3.82621	0.194187	0.647848	0.164754	0.00729998	8.3699e-05	8.84468e-05	0.000224438	0.00237567
7484	0.940386	0.0213956	0.00144372	0.00501446	0.0193861	138.995	207.565	369.384	656.368	27.5457	1.25553	-0.000381372	0.0147641	0.0224494	37.7767	1	15.1426	0.196209	7.16949	2.64359	1.79288	0.20266	10.4019	696.989	12.8003	0.316198	0.174725	0.00819516	0.0272228	0.4422	0.21064	0.17198	0.0352822	0.0864783	0.00214608	0.00442316	0.00317765	0.000364226	0.00261126	0.0908814	3.96383	0.200077	0.678562	0.178475	0.00718554	0.000124697	0.000136142	0.000114515	0.00291795
7492	0.536173	0.0264765	0.00186169	0.00663578	0.0237077	156.713	222.269	370.351	642.476	26.8979	1.45719	0.00121736	0.0181527	0.0270039	40.4943	1	14.8884	0.175169	6.93041	2.64492	1.96498	0.231021	11.5152	735.858	14.0901	0.339828	0.198332	0.00884387	0.0307871	0.506743	0.251957	0.191108	0.0440044	0.104751	0.00325244	0.00558016	0.00322891	0.000149025	0.00316137	0.093092	3.70221	0.159124	0.538793	0.15312	0.00663598	0.000175019	0.000292334	0.000130316	0.00232074
7496	0.53579	0.0270746	0.00136547	0.00610538	0.0220022	149.417	213.195	363.162	629.273	26.2518	1.43305	0.00169821	0.00893353	0.0201669	39.3936	1	14.6883	0.17818	6.88207	2.63806	1.96169	0.2213	11.3122	724.16	14.0278	0.337746	0.193043	0.00779623	0.0297198	0.499824	0.234301	0.178529	0.0421366	0.0980153	0.00341215	0.00551354	0.00284928	0.000132986	0.00253228	0.0937284	3.73922	0.169802	0.5431	0.152321	0.00715637	0.000204552	0.000276633	0.000266813	0.002189
7495	0.534686	0.0248448	0.00179116	0.00620421	0.0238597	153.053	217.865	364.691	615.107	26.1375	1.44117	0.00253247	0.0127553	0.0227132	40.2773	1	14.6568	0.18219	6.92486	2.68207	1.96184	0.229071	11.3648	715.288	14.0696	0.333753	0.194226	0.00866845	0.0302894	0.497961	0.232133	0.195003	0.0435601	0.0969605	0.00308258	0.00555761	0.0029322	8.19594e-05	0.00344509	0.0902945	3.75232	0.162319	0.548068	0.153019	0.00715225	0.000135021	0.000323498	0.000377648	0.00238092
7493	0.534599	0.0232581	0.00201149	0.00615388	0.0240627	154.22	223.072	380.499	640.119	27.0499	1.46806	0.00327797	0.0153128	0.0224139	39.7397	1	15.0353	0.180068	7.03789	2.66451	1.99669	0.230319	11.5999	732.246	14.441	0.341734	0.197419	0.00862832	0.0279383	0.518969	0.247215	0.194928	0.0432078	0.102689	0.00292584	0.00577708	0.00314229	0.00031524	0.00467985	0.0942188	3.83914	0.168452	0.551116	0.158319	0.00765668	0.000222837	0.000256584	0.000290026	0.00305457
7494	0.531505	0.0252392	0.0016986	0.00645087	0.0237096	152.997	225.174	375.484	631.954	26.8917	1.48274	0.00403512	0.0106642	0.0206037	40.0253	1	15.156	0.178659	7.06724	2.665	1.97691	0.23369	11.5854	744.59	14.5377	0.341607	0.198629	0.00881842	0.0299554	0.514769	0.239956	0.194791	0.0416319	0.0981726	0.00274008	0.0068776	0.00228336	0.00124256	0.00229363	0.0931163	3.88163	0.167402	0.549813	0.155809	0.0072904	0.000152119	0.000573309	0.000255266	0.00274205
7497	0.525516	0.0235195	0.00219361	0.00720383	0.0229522	156.494	227.027	372.172	635.318	27.2455	1.49327	0.00138677	0.0117358	0.0255792	41.4954	1	15.2852	0.181945	7.0993	2.73595	2.06797	0.24052	11.8907	754.839	14.6754	0.348541	0.206856	0.00958894	0.0334152	0.526733	0.24903	0.203077	0.042979	0.102061	0.00297834	0.00446613	0.00202438	-0.000328533	0.00265461	0.0926112	3.85381	0.164755	0.556824	0.152978	0.0072046	8.16603e-05	0.000304016	0.000176916	0.00296045
7498	0.512594	0.0224874	0.00156516	0.00678426	0.0225978	159.582	216.775	362.252	633.301	27.0257	1.46862	0.0013356	0.0101634	0.0227989	41.9974	1	14.8254	0.178481	7.01502	2.67641	1.98802	0.22588	11.5744	747.538	14.3326	0.336252	0.203258	0.00942352	0.0318091	0.512476	0.240921	0.196462	0.0398397	0.103067	0.00287627	0.00673612	0.00351823	3.82068e-05	0.00408021	0.0951706	3.89058	0.164576	0.540121	0.15982	0.00723371	0.000211164	0.000187437	0.000324596	0.00267221
7504	0.369812	0.0267876	0.00126147	0.00816601	0.0241809	170.599	237.817	380.94	641.523	28.1937	1.74716	0.00281693	0.0153994	0.0223506	44.7803	1	15.0756	0.176794	6.97542	2.91505	2.30348	0.263389	12.8615	812.636	16.2243	0.377146	0.224006	0.0105096	0.0337292	0.59956	0.274975	0.228551	0.0427083	0.112408	0.00293414	0.00613676	0.00408501	0.000148606	0.00307925	0.098301	3.45085	0.141637	0.437283	0.130009	0.00856341	0.000272534	0.000398422	0.000155389	0.00249847
7502	0.363349	0.0287045	0.00190421	0.00807029	0.0250354	184.178	255.156	406.106	671.627	29.9311	1.83302	0.00195038	0.0164739	0.0271728	46.6889	1	15.5176	0.181134	7.07471	2.98082	2.35942	0.274879	13.1977	830.13	16.5768	0.389482	0.232779	0.0116879	0.034705	0.609274	0.286329	0.231295	0.0440159	0.117371	0.00366873	0.00598475	0.00459764	0.000386182	0.00385803	0.101233	3.60946	0.142475	0.468261	0.144923	0.0077862	0.000302113	0.000544242	0.000382804	0.00265907
7503	0.363052	0.0255954	0.0015363	0.00738754	0.0257978	175.795	243.564	392.971	636.284	28.3984	1.78127	-0.00097717	0.00424575	0.023804	44.4991	1	15.5916	0.183226	6.9297	2.95229	2.32689	0.26368	13.0734	803.315	16.5308	0.381156	0.225099	0.00933588	0.0353099	0.59843	0.290042	0.230234	0.0452495	0.117079	0.00393036	0.00696053	0.00491919	-0.00128263	0.00420153	0.0996554	3.53554	0.134582	0.448917	0.135473	0.00736063	8.20325e-05	0.00037395	0.000421022	0.0029381
7501	0.36027	0.0271559	0.00155782	0.00735554	0.0264917	181.468	249.69	399.8	656.117	28.5707	1.77157	0.0013101	0.000128909	0.0216937	46.2444	1	15.2269	0.182517	6.93556	2.94286	2.34223	0.271691	13.0367	809.485	16.3059	0.384547	0.229716	0.0100553	0.0364788	0.589198	0.278211	0.224047	0.048147	0.116684	0.00374334	0.00657563	0.00379659	0.000629971	0.00442773	0.0960796	3.54247	0.136294	0.446808	0.134495	0.00738448	0.0001872	0.000331184	0.000345415	0.00283432
7500	0.355175	0.0311205	0.00200702	0.00932652	0.0249323	191.942	261.755	410.505	664.208	29.3848	1.7931	-0.0052606	0.0137145	0.0207883	46.047	1	15.0709	0.184136	6.86551	2.91826	2.26413	0.269419	12.985	809.138	16.3995	0.391891	0.232772	0.00912809	0.0366353	0.613279	0.298122	0.230853	0.0492882	0.117426	0.00271872	0.00607287	0.00312625	-0.000532022	0.00481559	0.100861	3.49562	0.13484	0.449355	0.136081	0.00784729	4.79003e-05	0.000506617	0.000360841	0.00347303
7499	0.353291	0.0319581	0.00195454	0.00968662	0.0266136	191.945	266.832	411.435	683.835	29.5601	1.82118	-0.00485716	0.012919	0.0273902	44.9647	1	15.4179	0.179699	6.76441	2.90888	2.3448	0.26379	12.9794	828.723	16.2827	0.389313	0.230779	0.0100815	0.0352689	0.619699	0.291533	0.227105	0.0480404	0.110786	0.00353758	0.00741032	0.00373483	2.54548e-05	0.00134546	0.0973141	3.52907	0.143414	0.454678	0.133803	0.00738464	0.000336231	0.000273028	0.000446613	0.00289673
7506	0.156518	0.0464328	0.00245166	0.0105536	0.0292563	263.65	320.261	470.182	691.778	30.1396	2.24166	-0.064484	-0.0223478	0.0197332	60.8413	1	15.8295	0.291457	6.50827	3.28243	3.0198	0.349441	15.834	988.116	19.6781	0.474023	0.289153	0.0123628	0.0479039	0.79179	0.360376	0.298099	0.0590686	0.139314	0.00457331	0.00649949	0.00424769	-0.00120159	0.00586715	0.114606	3.40069	0.119095	0.37505	0.117062	0.00989226	0.000231316	0.000829264	0.00138349	0.00411565
7505	0.155416	0.0431596	0.00267497	0.00897788	0.0273121	253.53	313.633	466.786	673.032	29.7059	2.20292	-0.0582875	0.00514019	0.0251954	59.4472	1	15.5888	0.284208	6.47217	3.19663	2.91553	0.33351	15.0273	962.108	19.2505	0.449319	0.288116	0.0134996	0.0474705	0.762198	0.358718	0.296976	0.0579688	0.139669	0.00446084	0.0063148	0.00385515	-0.00702749	0.00523953	0.116251	3.34433	0.114452	0.370725	0.11305	0.0084215	0.000111136	0.000791644	0.00113716	0.00342543
7507	0.153344	0.0439224	0.00171429	0.0112284	0.0286933	256.323	310.772	457.136	677.73	29.9357	2.21485	-0.0753905	0.0146302	0.0246595	56.0221	1	15.6214	0.277462	6.46007	3.29312	2.9728	0.333479	15.3918	984.893	19.3344	0.460124	0.297585	0.0142346	0.046406	0.760956	0.355608	0.295462	0.0576355	0.143735	0.00417245	0.00748164	0.00455805	-0.00020416	0.00639347	0.113357	3.32139	0.112789	0.3748	0.114431	0.00824843	0.000369465	0.000567903	0.00108646	0.00410827
7513	0.0538571	0.0680757	0.0031698	0.0123147	0.0246204	346.145	382.703	522.987	607.481	26.6903	2.22224	-0.354156	-0.0558022	0.0182034	76.3572	1	16.6176	1.11108	5.58737	3.08536	3.58137	0.405472	17.0495	1110.03	22.3331	0.540588	0.371621	0.0335263	0.0772254	0.932431	0.443637	0.351102	0.0675795	0.157552	0.0051113	0.007743	0.0044685	-0.00978526	-0.000189269	0.12031	3.01919	0.0769291	0.242735	0.0822144	0.00731679	0.00051996	0.00214103	0.00832893	0.00595444
7510	0.0530555	0.0754429	0.00207453	0.013241	0.0250486	374.992	399.948	548.523	629.727	27.2468	2.35775	-0.471173	0.00642388	0.013881	74.8649	1	17.131	1.21311	5.72632	3.21306	3.8262	0.42154	17.4953	1126.36	23.4193	0.555518	0.40136	0.0399729	0.073535	0.994974	0.486323	0.383421	0.0748677	0.176349	0.00462431	0.00916666	0.00366635	0.000107551	0.00215211	0.138598	3.16176	0.0825163	0.261883	0.0824901	0.00914146	0.000254337	0.00252298	0.00976931	0.00756098
7511	0.053023	0.0725857	0.0023425	0.0116937	0.02429	362.753	395.542	546.225	627.213	27.5099	2.29674	-0.95124	-0.0987577	0.0124646	72.6507	1	16.8201	1.20832	5.71497	3.19422	3.69492	0.402181	17.7227	1113.53	22.928	0.573302	0.394777	0.0378465	0.0746278	0.936215	0.438842	0.364334	0.068873	0.162034	0.00744715	0.00738898	0.0030395	-0.00225519	-0.00491308	0.129581	3.02953	0.0815772	0.26507	0.0857256	0.00789891	0.000266141	0.00260812	0.009747	0.0060689
7508	0.0240006	0.0982915	0.00206327	0.0116385	0.028438	466.763	462.472	638.651	573.449	25.0585	2.26936	-3.59755	-0.000560783	0.0279521	80.6128	1	17.5609	2.83864	4.82697	2.73119	3.95838	0.422454	18.2608	1157.73	26.0465	0.577407	0.419992	0.10918	0.102868	1.09884	0.51998	0.435519	0.0855278	0.185748	0.00863049	0.00866126	0.00337338	0.00152295	0.00262871	0.134734	2.77901	0.0552238	0.1889	0.0628108	0.00682451	0.000219668	0.00451217	0.0319832	0.0077171
7509	0.0237506	0.106603	0.00256712	0.0143886	0.0304167	473.296	451.874	631.715	593.403	24.7744	2.27765	0.927543	-0.11937	0.0260683	87.8531	1	17.4151	2.90074	4.86206	2.79938	4.18041	0.421328	18.4691	1157.88	26.5059	0.59203	0.435495	0.112785	0.105	1.10441	0.548598	0.436168	0.0850335	0.187063	0.017255	0.0100535	0.00456677	-0.0078308	-0.00219032	0.137609	2.72809	0.0529578	0.184026	0.0635386	0.00690441	0.000425862	0.00533011	0.0309805	0.00964389
[truncated: 43 more columns]

## Sheet: USGS MACS3
file	NAI	Li(7)	Be(9)	B(11)	Ca2+(21.5)	Na(23)	Mg(24)	Al(27)	Si(28)	Si(29)	P(31)	S(33)	S(34)	Cl(35)	K(39)	Ca(43)	Ca(44)	Sc(45)	Ti(49)	V(51)	Cr(52)	Cr(53)	Mn(55)	Fe(56)	Fe(57)	Co(59)	Ni(60)	Ni(61)	Ni(62)	Cu(63)	Cu(65)	Zn(66)	Zn(67)	Ga(71)	Ge(73)	Ge(74)	As(75)	Se(77)	Br(79)	Rb(85)	Sr(88)	Y(89)	Zr(90)	Nb(93)	Mo(95)	Ru(101)	Rh(103)	Pd(105)	Ag(107)
7453	32.2437	0.046091	0.00673947	0.000494636	0.00214675	6.00569	1.33999	0.347527	0.225053	0.012273	0.00860897	0.000360163	0.0020474	0.00139135	0.00678642	1	16.5248	0.0388288	0.00502028	0.0756204	0.150525	0.0212828	0.908461	12.8562	0.335561	0.0792669	0.0164075	0.000633094	0.00233437	0.0802391	0.0382465	0.0140435	0.00198429	0.00881089	0.00528944	0.0234705	0.00851213	0.000106698	6.21111e-05	-0.00014738	13.8514	0.0549047	0.010651	0.118716	0.000742118	0.00836601	-1.17348e-05	0.00170969	0.0356905
7454	32.042	0.0528228	0.00691554	0.000501673	0.00211885	6.0002	1.2658	0.324158	0.248571	0.0108496	0.00694448	9.22228e-05	-0.00101262	-0.000266334	-0.00498078	1	15.6243	0.0420219	0.00583184	0.0791501	0.148834	0.0175952	0.888017	12.9266	0.326156	0.0807978	0.0156822	0.000514741	0.00288253	0.0802084	0.0364382	0.0115073	0.0018451	0.00940022	0.0054336	0.0239607	0.00950645	3.35045e-05	0.00069601	0.00036258	13.137	0.055872	0.00945516	0.116908	-0.000353108	0.00787971	3.14484e-05	0.00125454	0.0339356
7452	32.0048	0.0426224	0.00757791	0.000394522	0.00218059	6.87598	1.48565	0.319715	0.24549	0.0112884	0.00781008	-0.000300555	-0.000855717	0.00168247	0.00141873	1	16.5994	0.0379437	0.00522247	0.0710786	0.141399	0.0172585	0.976298	13.4651	0.319049	0.101443	0.0182022	0.000584397	0.00257589	0.0906951	0.0411348	0.0152515	0.00194661	0.00836469	0.00413284	0.0247099	0.00867152	0.000101866	0.000320845	0.00031524	16.6809	0.0511802	0.0108729	0.109387	0.000795067	0.00723087	-3.07203e-05	0.0014886	0.031844
7459	31.6998	0.0456454	0.00717067	0.000520708	0.00232541	5.99615	1.36221	0.262688	0.204553	0.0120666	0.00739935	0.000713562	0.00035172	0.00123612	-0.00430382	1	14.9531	0.0366398	0.00395661	0.0586418	0.12362	0.0135201	0.843762	10.601	0.266865	0.0791411	0.0140429	0.000539401	0.00229375	0.0739436	0.0335556	0.0109428	0.00130998	0.00721645	0.00403657	0.0185034	0.00688276	0.000102227	0.000306975	0.000556173	13.9576	0.0498013	0.007884	0.0936676	0.000861509	0.00670204	-7.04171e-05	0.00095095	0.0250769
7458	31.6993	0.042243	0.00796065	0.000396804	0.00189155	6.86968	1.41797	0.291531	0.21646	0.00998039	0.00760633	2.22681e-05	0.00123414	0.000847313	-0.00413063	1	16.5747	0.0348936	0.00524234	0.0632312	0.130749	0.0151261	0.946832	11.5778	0.296726	0.0888959	0.0162362	0.000590833	0.00234832	0.0816143	0.0389695	0.0140729	0.00235928	0.00855688	0.00496655	0.0194906	0.00806622	0.000170582	0.000556048	-0.000319503	14.9243	0.0482125	0.00928804	0.0965654	0.00100782	0.00605442	-7.05824e-05	0.00115593	0.0315313
7457	31.413	0.0451309	0.00726985	0.000508592	0.00245697	6.40996	1.28956	0.320227	0.253577	0.014746	0.00759362	1.9386e-05	-0.000635153	0.00105814	0.00930619	1	15.9683	0.0365267	0.00529544	0.0682029	0.139574	0.0157816	0.908648	12.6282	0.282895	0.0741753	0.0147144	0.000816567	0.00196567	0.0734916	0.0363037	0.0118844	0.00164963	0.00966058	0.0039481	0.0223853	0.00697288	-1.76902e-05	-0.000197019	0.000311569	12.935	0.0537598	0.00876333	0.108528	-0.000512714	0.00870905	-9.94073e-05	0.00123854	0.0280313
7456	29.2709	0.0467608	0.00668737	0.000359532	0.0025094	6.37928	1.42751	0.308344	0.216819	0.00990934	0.00761019	0.000729993	0.000310899	0.00227695	-0.00878563	1	15.9055	0.0380324	0.00410845	0.0711029	0.151254	0.0160838	0.945915	14.9157	0.296878	0.0884195	0.0144778	0.000543295	0.00248604	0.0849755	0.0392394	0.0136119	0.00184086	0.00856066	0.00467085	0.0210788	0.00645799	-7.66429e-05	0.000370735	-0.000844888	17.2471	0.0550507	0.00965924	0.109094	6.69588e-05	0.00754012	-1.08966e-05	0.00178443	0.0297759
7455	27.6744	0.0469258	0.00674793	0.000354105	0.00240107	6.32399	1.40081	0.258107	0.230093	0.0145147	0.00679163	0.00166368	-0.000500097	0.00225669	-0.0116466	1	16.1813	0.0378092	0.00413071	0.0618729	0.135585	0.0172164	0.87025	11.8788	0.278415	0.0786598	0.0149151	0.000850657	0.00203611	0.0817709	0.0361263	0.0130873	0.00174865	0.0073342	0.00418127	0.0162055	0.00795274	-0.000156123	-1.67532e-05	0.000566666	14.4971	0.0510267	0.00864936	0.108695	0.000712123	0.00610483	1.75935e-05	0.0010142	0.0288587
7467	10.923	0.0531663	0.00675489	0.000739128	0.00334615	6.51916	1.39112	0.308089	0.247199	0.0129584	0.0111817	-9.05074e-05	0.000128138	0.000438013	0.00539557	1	17.2765	0.0381563	0.00441948	0.0746321	0.144813	0.0170975	0.867581	14.8941	0.309847	0.0759014	0.0166416	0.00082506	0.00236702	0.0759311	0.0350511	0.0167883	0.0025829	0.00836461	0.00489711	0.0225716	0.0102011	0.000163421	0.000659678	0.000519547	16.7668	0.0562969	0.00980172	0.119242	9.82345e-05	0.0102644	3.17525e-05	0.00146456	0.0319201
7465	10.7732	0.0488487	0.00699756	0.000713486	0.00282214	6.537	1.361	0.26197	0.238819	0.0126705	0.00946505	-0.000194854	0.00120274	7.06937e-05	0.00392077	1	16.5041	0.0362429	0.00382452	0.0587792	0.124074	0.0145416	0.904899	12.3804	0.277239	0.0796201	0.0136185	0.000780251	0.00215589	0.0731211	0.0343642	0.0161785	0.00251885	0.0069683	0.0039943	0.0189804	0.00844294	8.04997e-05	0.000694029	0.000473267	16.7109	0.0514543	0.00890727	0.0941195	0.000572059	0.00673413	-1.39324e-05	0.00108139	0.026245
7464	10.7328	0.0492409	0.00674765	0.000576824	0.00293014	6.26967	1.35966	0.305116	0.267742	0.0136745	0.0118241	0.000290239	0.000644277	0.00200323	-0.00381147	1	17.7454	0.0381568	0.00472116	0.0728414	0.142159	0.0162548	0.878305	15.773	0.304192	0.0823034	0.0150487	0.000634178	0.00221005	0.0795625	0.0355855	0.0160931	0.00222722	0.00913377	0.00492879	0.022894	0.0107202	0.000139896	0.00023707	-0.000151067	17.4747	0.0541385	0.0100512	0.110717	0.000404277	0.00879974	5.32854e-06	0.00136677	0.0300471
7463	10.6944	0.0467734	0.00686884	0.000422315	0.00269535	6.13839	1.32389	0.256925	0.254668	0.0144749	0.0098103	0.00048651	0.000839126	0.000383231	-0.00323756	1	17.1597	0.0338448	0.00424309	0.0650509	0.120921	0.014236	0.837232	12.2574	0.270922	0.0770408	0.0149634	0.000775347	0.00182718	0.0728207	0.0347578	0.0154401	0.00211001	0.00776374	0.00407222	0.0193341	0.00918331	0.000115394	9.87086e-05	0.000236789	16.8824	0.0515511	0.00835208	0.0945075	0.000287238	0.00669373	1.86374e-06	0.00144015	0.0272144
7466	10.6665	0.0474246	0.00700228	0.000559671	0.00332433	7.37566	1.49569	0.240638	0.201921	0.0098119	0.00918508	0.000125759	0.00152855	0.00073631	-0.00268815	1	16.2489	0.0331942	0.0035177	0.052176	0.116003	0.0121411	0.864729	10.9074	0.256764	0.085788	0.0145192	0.000569567	0.00185988	0.0827036	0.0383917	0.0169406	0.00258293	0.00671445	0.00352467	0.0161176	0.00764877	6.13267e-05	0.00021444	-1.94068e-06	17.8268	0.0489319	0.00773773	0.0806488	0.000717818	0.00534977	8.37704e-05	0.00102803	0.022799
7462	10.3326	0.0518279	0.00666168	0.000565382	0.00342244	6.60972	1.29712	0.260418	0.242491	0.011772	0.0106864	2.45548e-05	0.000574434	0.00167437	-0.00306922	1	17.35	0.0351855	0.00417253	0.0675781	0.125638	0.0147485	0.879509	13.5277	0.275167	0.0775215	0.0166819	0.000609934	0.00237775	0.0741918	0.0342904	0.0157201	0.00209745	0.00820913	0.00493856	0.0198553	0.00900377	0.000123337	0.000198005	-0.000133107	17.1109	0.0540146	0.0083938	0.0985399	0.000429113	0.00735202	5.2814e-05	0.0013588	0.0288949
7461	10.2107	0.0466339	0.00670614	0.000359858	0.00272684	6.71269	1.34575	0.283997	0.224714	0.012087	0.0092825	0.000320258	0.000734113	0.00171474	0.0110943	1	16.6788	0.0343909	0.00384352	0.0594873	0.121954	0.0127289	0.867389	12.322	0.289903	0.080364	0.0150615	0.000708732	0.00214667	0.0747011	0.0355174	0.016225	0.00233734	0.00706711	0.00359096	0.0199848	0.00861767	0.000168147	0.000365768	5.42111e-05	17.06	0.0531182	0.00816005	0.0950868	0.000467162	0.00680114	-4.33885e-06	0.00151873	0.0337999
7460	10.1928	0.0496567	0.00648811	0.000498155	0.00297156	6.86563	1.40697	0.268843	0.250426	0.0128225	0.00950536	-0.000398611	0.000799294	0.0024744	-0.000621304	1	16.4799	0.0360083	0.00349026	0.0522667	0.1106	0.0129393	0.876298	11.2132	0.246227	0.0838987	0.015606	0.000810283	0.00206788	0.0786455	0.0356094	0.0175783	0.00268803	0.0073282	0.00383375	0.0171358	0.00799318	0.000168794	0.00037726	-1.67811e-06	18.4848	0.0523854	0.00727596	0.0822184	0.00044664	0.00575587	1.71527e-05	0.00147712	0.0267966
7475	7.07763	0.0522591	0.00824595	0.000652464	0.00396378	6.83935	1.47515	0.279984	0.35196	0.0202688	0.0123621	-0.000163872	0.000764783	0.00244501	-0.000129334	1	16.9142	0.0366703	0.00454933	0.0667371	0.130754	0.0150037	0.903965	14.0617	0.288575	0.0883579	0.0167241	0.000655352	0.00249584	0.0779599	0.038868	0.0217037	0.00243752	0.00805158	0.00474857	0.0219689	0.0117196	0.000184103	0.000476149	0.000351184	17.1682	0.0527654	0.00935079	0.0994169	0.000309555	0.0068038	2.7227e-05	0.0014102	0.0333081
7474	6.94032	0.0507344	0.00814998	0.000849644	0.00333649	6.57503	1.37472	0.30469	0.402911	0.0189787	0.0188553	0.000241623	-0.000337429	0.00129221	-0.00108179	1	16.9424	0.0360704	0.00509703	0.0676727	0.136754	0.0182819	0.879206	13.7684	0.301192	0.0810972	0.0152026	0.00084689	0.00237082	0.0765449	0.0364862	0.0205083	0.00297967	0.00833866	0.00450883	0.020147	0.0116064	0.00022343	0.000581674	7.55534e-05	16.1829	0.0534217	0.00914113	0.10726	0.00037217	0.00779789	1.07663e-05	0.00129279	0.0361492
7473	6.55671	0.0521788	0.00913047	0.00144928	0.00334839	7.02592	1.42341	0.304307	0.439204	0.0234471	0.0132297	-0.000955746	0.00076394	0.00144791	-0.00198765	1	17.8052	0.0361718	0.00435984	0.0663086	0.13463	0.0159964	0.876959	15.5024	0.313272	0.0836765	0.0164244	0.000878045	0.00263551	0.0818799	0.0409617	0.0195524	0.00271083	0.0087389	0.00559432	0.024068	0.0125697	0.000240851	0.000669041	-1.16779e-05	16.534	0.0530587	0.00886377	0.115876	0.000543457	0.00900757	5.33672e-05	0.00140506	0.0351772
7472	6.3102	0.0538252	0.00880456	0.000940765	0.00381544	6.85442	1.42721	0.251564	0.423947	0.0226778	0.011849	0.000500958	0.00060723	0.00355342	0.000764491	1	17.4675	0.0351417	0.00404194	0.0620849	0.126831	0.0133462	0.8838	12.5941	0.275654	0.0825631	0.0156336	0.00075033	0.00216136	0.0809367	0.0399624	0.0207974	0.00294086	0.00712087	0.0038578	0.0198259	0.0090932	2.83024e-06	5.94732e-05	-4.17977e-05	17.5608	0.0530908	0.00782803	0.0945038	0.000339121	0.00650594	2.21837e-05	0.00134398	0.0328857
7468	4.34713	0.053275	0.00970989	0.00092336	0.00504425	7.00262	1.427	0.236789	0.255872	0.0135729	0.015244	0.000247126	0.000260672	0.00236358	0.00234832	1	16.9328	0.0330111	0.00410231	0.0599927	0.128591	0.0131471	0.839694	12.9571	0.287376	0.0837734	0.0166924	0.000587161	0.00202418	0.0735154	0.0336949	0.0235437	0.00304151	0.00742904	0.00397363	0.0198772	0.0124403	0.000139478	0.000146989	-0.000335842	18.5824	0.0477525	0.00754471	0.0934944	0.000252583	0.00702403	2.35598e-05	0.00124678	0.0323253
7471	4.33114	0.0481681	0.00969939	0.00115557	0.0049222	8.40024	1.3543	0.214246	0.265378	0.0142984	0.0133551	0.000296221	0.000592966	0.000991144	-0.00305431	1	17.8814	0.030378	0.00348591	0.0564929	0.115445	0.0119659	0.9542	13.0243	0.249441	0.0874658	0.0145124	0.000714129	0.00179288	0.0808857	0.0398612	0.0295332	0.00486521	0.00765037	0.00395405	0.0194343	0.0119109	0.00019348	7.57128e-05	6.38618e-05	17.6782	0.0512671	0.00677796	0.0777076	0.000307534	0.00610074	2.95778e-05	0.000935796	0.0275926
7469	4.30732	0.0497259	0.00958651	0.000771399	0.00441898	6.65117	1.34366	0.239424	0.25021	0.0125291	0.0137435	0.000131732	-3.01185e-05	0.00103165	-0.000369702	1	16.8805	0.0308613	0.0043601	0.0642871	0.122154	0.0136561	0.78392	12.8523	0.269713	0.0761939	0.0143176	0.000639509	0.00187345	0.0687638	0.0322438	0.0208059	0.0035225	0.00694625	0.00458216	0.0212218	0.0141248	8.55563e-05	-2.42674e-05	-0.000136844	17.2245	0.0458811	0.00745748	0.0907695	0.000219514	0.0065813	2.19509e-06	0.00128561	0.0378899
7470	4.30318	0.0532641	0.0102829	0.000708539	0.00493722	6.86567	1.36795	0.243544	0.270098	0.0126921	0.0143239	0.00053503	0.00107188	0.000420453	-0.00285198	1	17.509	0.0325726	0.00408201	0.0636183	0.124488	0.01344	0.852145	13.1681	0.277385	0.0768061	0.0147653	0.000737705	0.00235832	0.0705631	0.0335193	0.0230771	0.00333748	0.00738993	0.00446826	0.0212243	0.0141284	0.000124129	0.000355987	0.000359623	18.2679	0.050122	0.00827973	0.0916561	0.000438549	0.00725089	2.00686e-05	0.00105811	0.0356542
7481	2.90918	0.0500046	0.0112015	0.00109376	0.00658437	7.6107	1.41314	0.193691	0.260843	0.0131011	0.0156503	0.000396058	-0.000376196	0.00151187	0.0013483	1	17.2064	0.0275434	0.00279535	0.0505932	0.0944453	0.0107397	0.809693	11.8263	0.24643	0.0770747	0.0139879	0.000696134	0.00164992	0.0720363	0.0344262	0.0264035	0.0040293	0.00746463	0.00328894	0.0167427	0.012218	0.000232441	0.000159688	-2.71854e-05	16.4474	0.0401536	0.00617963	0.0677393	0.000452789	0.00679885	-5.99538e-06	0.00115496	0.0319562
7483	2.86508	0.0519715	0.0128014	0.00135648	0.00716487	7.40776	1.38367	0.228806	0.222638	0.0137043	0.0225517	-0.000323932	0.00122887	0.00154351	0.00248134	1	16.1113	0.0284408	0.00376559	0.065805	0.133898	0.0142105	0.820773	13.0955	0.2923	0.0755064	0.0154078	0.000640775	0.00226356	0.0743522	0.0355324	0.0262994	0.00415596	0.00838769	0.00521264	0.0235649	0.0164371	0.000213699	0.000131979	0.000215136	16.7021	0.0424617	0.00706606	0.0813005	0.000306636	0.00694798	2.03682e-05	0.00140568	0.0377203
7480	2.85965	0.0530077	0.0135393	0.00140547	0.0066387	7.06887	1.45456	0.309299	0.316193	0.0173482	0.0190871	0.000301147	0.00188735	0.00238769	0.00559591	1	16.6057	0.0325343	0.00440331	0.0659156	0.125203	0.014856	0.882039	14.5597	0.302015	0.0917579	0.0152135	0.00060762	0.00229425	0.0835376	0.0395852	0.0297376	0.00435721	0.0097601	0.00507079	0.0264367	0.0168675	0.000172418	0.000227664	0.000283196	17.7405	0.0467494	0.00831975	0.0926883	0.000318274	0.00859351	3.45862e-05	0.001475	0.040001
7482	2.83456	0.0534012	0.0130326	0.000960334	0.00639587	6.91494	1.44847	0.253757	0.35387	0.0180181	0.021802	0.000202035	0.00110721	0.00210467	-0.000690741	1	16.7146	0.0298434	0.00402606	0.067955	0.138773	0.0138375	0.891942	14.7785	0.305508	0.0858753	0.0160363	0.000746512	0.00251334	0.0801376	0.0382416	0.030232	0.00451213	0.00968045	0.00517679	0.0237814	0.0223893	0.000241997	0.000426298	-5.06531e-05	17.0723	0.046761	0.00777099	0.0965198	0.000421012	0.00794272	1.63747e-05	0.00139796	0.0407234
7479	2.7318	0.0530811	0.0133378	0.00143253	0.00785122	7.63938	1.55215	0.209348	0.340359	0.0184795	0.0143845	0.000812128	0.00092899	0.00103972	-0.00167052	1	16.7967	0.030208	0.00312712	0.0543627	0.11145	0.0116063	0.900523	13.6504	0.264198	0.093847	0.0156723	0.000517128	0.00199794	0.0828471	0.0388108	0.0318437	0.00445775	0.0088658	0.00403518	0.0191798	0.014805	0.000346328	3.04041e-05	0.000102823	20.4174	0.0442161	0.00655659	0.0741941	0.000577606	0.00760716	2.19719e-05	0.00164684	0.0360095
7478	2.67402	0.0572134	0.0133638	0.00173206	0.00734452	8.51431	1.46746	0.22564	0.343285	0.0169889	0.0164984	-1.65152e-05	0.000555771	0.000718773	-0.00149815	1	16.6781	0.0296668	0.00318576	0.0554313	0.116543	0.012922	0.883939	13.9933	0.279005	0.0886733	0.0159327	0.000595198	0.00207017	0.0835124	0.0394135	0.0305008	0.00491208	0.00811594	0.00453388	0.0229334	0.0155315	0.00014764	0.000264364	0.000103985	18.1612	0.0447001	0.00691407	0.0829717	0.000413182	0.00719062	1.22833e-05	0.00126603	0.0379927
7477	2.67051	0.0552021	0.0134616	0.00119727	0.00695107	7.15819	1.50654	0.246011	0.397938	0.0199814	0.0192832	0.000240497	0.000458138	0.000966432	0.000792779	1	17.1838	0.0310172	0.00410071	0.0657291	0.12191	0.0143383	1.00825	15.3595	0.291617	0.0864344	0.0156587	0.000823621	0.00238454	0.0777034	0.0366218	0.0301778	0.0043699	0.0090365	0.00444591	0.0222514	0.016646	6.76048e-05	0.000411743	0.00016568	17.3755	0.046809	0.00804473	0.090671	0.000533216	0.00721548	3.13408e-05	0.0014516	0.0437266
7476	2.57736	0.0505083	0.0126183	0.00158037	0.00735908	7.00315	1.44639	0.265145	0.361641	0.0180553	0.0212544	-3.63243e-05	0.00127278	0.00147234	0.00130379	1	17.0074	0.0312037	0.00450825	0.0704998	0.13721	0.015431	0.917388	14.874	0.307881	0.0907076	0.0165983	0.000703295	0.00232181	0.0838959	0.0403207	0.0316142	0.00425797	0.0102838	0.00520743	0.0264581	0.0180991	0.000311678	0.00016947	-0.000104653	20.4804	0.0459425	0.00804182	0.0971657	0.000446899	0.00801802	2.78408e-05	0.00139925	0.042809
7489	0.981046	0.0552577	0.0170592	0.00144586	0.0157662	7.30233	1.48707	0.183946	0.21694	0.0119434	0.0192953	-0.000880588	-0.000774505	0.00111226	-0.00484948	1	15.441	0.021277	0.00267702	0.0536651	0.127771	0.0131871	0.877466	13.3152	0.284922	0.0796268	0.0155576	0.000525843	0.00203711	0.0749859	0.0359979	0.031809	0.00447171	0.0100189	0.00468933	0.0226585	0.0190324	0.000285885	0.00114063	5.91329e-05	16.0837	0.0331542	0.00417308	0.0551081	0.000250218	0.00729922	2.26465e-05	0.00154217	0.0425695
7488	0.963685	0.0525263	0.0154967	0.00176845	0.0168678	6.90015	1.60581	0.199695	0.25145	0.0141	0.0222402	0.000270559	0.000302396	0.00148695	-0.00729314	1	16.3259	0.0217545	0.00281249	0.0562233	0.120795	0.0130196	0.905399	13.6852	0.285587	0.0874688	0.0169555	0.000895078	0.00260534	0.0844367	0.0392174	0.0400085	0.0053948	0.00947473	0.00542704	0.0252903	0.0202735	0.000449713	0.000593263	0.000182814	16.4789	0.033497	0.00530526	0.0591756	0.000419874	0.00705941	4.92376e-05	0.00138834	0.0497834
7487	0.961354	0.0559717	0.0161736	0.00155559	0.0166551	7.98193	1.59638	0.19804	0.243734	0.0126927	0.0198557	3.20262e-06	0.000336259	0.00138667	-0.00267929	1	15.7988	0.0223497	0.00258539	0.0551272	0.119131	0.013018	0.939297	13.9547	0.28986	0.0853335	0.0158791	0.000884243	0.00199409	0.0833225	0.0403191	0.0376918	0.00518462	0.010308	0.00473122	0.0254247	0.0288741	0.000177892	-5.49046e-05	6.99273e-06	16.8231	0.0330294	0.00509792	0.0622284	0.000306902	0.00770294	0.000136105	0.00142792	0.0460684
7491	0.957221	0.0605356	0.0168639	0.00138297	0.0170985	8.19933	1.64517	0.196432	0.239861	0.0121045	0.0193655	-0.000501827	0.000911723	0.00256855	3.11068e-05	1	15.9889	0.0235902	0.00247537	0.053095	0.116498	0.0124701	0.918495	13.3776	0.275536	0.0884233	0.0151004	0.000563346	0.00214288	0.0851918	0.0393543	0.038929	0.00534388	0.00882674	0.00461823	0.0226332	0.0187208	0.000127541	0.000152895	0.000164139	17.1179	0.0341123	0.00509769	0.0611628	0.000381105	0.00645977	6.29227e-05	0.00131628	0.0405079
7490	0.956384	0.0579311	0.016936	0.00162156	0.0165182	7.98327	1.55266	0.217567	0.299174	0.0160537	0.0220202	0.000239696	0.00183953	0.0030862	-0.000611131	1	16.2804	0.0244866	0.00318858	0.0576563	0.1332	0.0133834	0.939332	14.7232	0.307407	0.0803094	0.015234	0.000727489	0.00280472	0.091748	0.0380412	0.0381817	0.00505368	0.0104241	0.00524379	0.027659	0.023128	0.000417843	0.000575138	7.56461e-05	16.8576	0.0371698	0.00501484	0.067121	0.000372917	0.00859471	8.01447e-05	0.00146617	0.0532649
7485	0.955413	0.0590119	0.0173506	0.00135553	0.0173485	8.41921	1.66226	0.189306	0.261507	0.0116693	0.0201314	-0.000126932	0.00138491	0.00123498	-0.00513902	1	17.1738	0.0235269	0.00333385	0.0502863	0.110464	0.0121964	0.941837	13.6229	0.268346	0.0862823	0.0167146	0.00069472	0.00207852	0.0869895	0.0394922	0.0419025	0.00593985	0.00844274	0.00459056	0.0206778	0.0172756	0.000285865	0.000506221	6.2798e-05	18.473	0.0375612	0.00476512	0.0554718	0.000310144	0.00637214	4.55096e-05	0.00147598	0.0396751
7486	0.945742	0.0481715	0.0208045	0.00167414	0.0183173	9.84208	1.50478	0.169005	0.256752	0.0113986	0.0203749	-0.000532718	0.00158617	0.00131581	-0.00514808	1	16.4252	0.0217748	0.00239513	0.0440107	0.10355	0.0107033	0.959737	12.7834	0.261185	0.0935485	0.0161429	0.000621159	0.00220455	0.117245	0.0561806	0.0437895	0.00659467	0.00898979	0.00402482	0.0194716	0.0150401	0.000401064	0.000241614	0.000119332	17	0.0489838	0.00424679	0.046596	0.000427544	0.00608834	6.07512e-05	0.00119926	0.0354292
7484	0.940386	0.0631236	0.0183358	0.00184759	0.0185222	8.59824	1.61588	0.230521	0.283957	0.0139306	0.0259101	2.86562e-06	0.000306805	0.0014692	-0.000716095	1	17.3057	0.0242382	0.00368146	0.0689064	0.141018	0.0149426	0.897723	16.3436	0.322101	0.0784912	0.0157412	0.000670044	0.00239354	0.0835082	0.038534	0.0348853	0.00537951	0.0105627	0.00612778	0.0289094	0.0236527	0.000232948	0.000261848	-9.00935e-06	16.9123	0.0364305	0.00613244	0.0741106	0.000514767	0.00929947	2.76287e-05	0.00191789	0.0553818
7492	0.536173	0.071419	0.0209173	0.0022125	0.0216574	9.69027	1.81429	0.20103	0.251955	0.0128206	0.0243334	0.000702289	0.00241475	0.00114941	-0.00840201	1	16.117	0.0195831	0.0028959	0.0564794	0.138254	0.0144914	0.973108	15.6506	0.317973	0.0832725	0.0170156	0.00055993	0.00222454	0.0888466	0.0420645	0.03915	0.00699449	0.0106358	0.00660151	0.0248342	0.0229519	0.000390482	0.00021334	0.000134243	15.8048	0.0290173	0.00384992	0.0497085	0.00032719	0.00707718	0.000156891	0.00137429	0.0467484
7496	0.53579	0.0616279	0.0208741	0.00180406	0.0198291	9.61805	1.92795	0.186758	0.235656	0.0142854	0.0175658	-0.000902729	-0.000604342	0.00178007	-0.000783472	1	16.3112	0.0182885	0.00238983	0.0474882	0.116224	0.0113025	0.986484	13.8142	0.29206	0.0926932	0.0160577	0.000553883	0.00249916	0.100795	0.0466568	0.0429957	0.0075442	0.00885509	0.00493135	0.0212819	0.0190433	0.000240472	0.000322409	0.000153028	17.7665	0.0259114	0.00318944	0.0422838	0.000398736	0.00637826	7.85297e-05	0.00151827	0.0453128
7495	0.534686	0.0707127	0.0207427	0.001872	0.021394	8.86303	1.80846	0.214933	0.257578	0.0156457	0.0225229	0.000380128	-0.00049167	0.000866792	-0.0035385	1	16.0964	0.0174436	0.00260386	0.0570984	0.132916	0.0143688	0.923835	15.2496	0.315594	0.0812631	0.016944	0.000599095	0.00248383	0.0842907	0.0427112	0.0385926	0.0056788	0.0104327	0.00500698	0.0246984	0.0238899	0.00027848	-0.000107962	1.95524e-05	16.4539	0.0264468	0.00388309	0.0487624	0.00033956	0.00694028	5.08496e-05	0.00120343	0.053576
7493	0.534599	0.0693126	0.0198049	0.00216017	0.0207903	9.60788	1.86167	0.190085	0.249237	0.014063	0.0243127	-0.000433893	0.00337271	0.000680355	-0.0109025	1	15.8063	0.0179725	0.0022366	0.0559184	0.126574	0.0142104	0.962016	14.9196	0.308901	0.0862319	0.0155851	0.000808482	0.00281918	0.0924572	0.0431729	0.0393337	0.0067306	0.0117876	0.00568398	0.0251246	0.0238102	0.000158997	0.000182226	0.00011188	16.6378	0.0255266	0.00375395	0.0445343	0.000279569	0.00659006	2.94873e-05	0.00154216	0.0500033
7494	0.531505	0.06645	0.020961	0.00210118	0.0205784	8.51549	1.71886	0.197209	0.241739	0.0115934	0.022659	0.00158516	0.00101519	0.00198254	-0.00107468	1	16.2205	0.0189365	0.00240398	0.0583086	0.130637	0.0148009	1.01872	15.5343	0.299197	0.0799071	0.0160975	0.00063695	0.00241685	0.0836567	0.0390436	0.0383625	0.00593562	0.0109598	0.00521121	0.024071	0.0228029	0.000131637	8.21637e-05	6.10625e-05	15.2413	0.0264921	0.00459199	0.047363	0.00040358	0.00716465	0.000100816	0.00134553	0.0482633
7497	0.525516	0.0661513	0.0188013	0.00188816	0.0202204	7.31074	1.67871	0.212513	0.216116	0.0107708	0.026438	-0.000486514	0.000854588	0.00104508	-0.00173823	1	15.6955	0.0182045	0.00293813	0.0621847	0.144047	0.0159473	0.944191	15.6526	0.334104	0.0780809	0.0163677	0.000783427	0.00232828	0.0830384	0.0397183	0.0382509	0.00553187	0.0113854	0.00612289	0.027283	0.0267582	0.000379932	0.000572136	3.32777e-06	15.1568	0.0282389	0.00440968	0.0527874	0.000312226	0.00788141	9.39401e-05	0.00158353	0.0542661
7498	0.512594	0.0648832	0.0208015	0.00194453	0.019997	8.07639	1.83075	0.167944	0.20657	0.0104361	0.0207191	0.000420828	0.00178087	0.0011296	-0.00848076	1	16.0815	0.0184961	0.00203714	0.0461239	0.107061	0.0112694	0.96334	13.5475	0.277335	0.0881027	0.0159862	0.000617961	0.00201978	0.0928234	0.0431015	0.0432425	0.00660237	0.00915734	0.00450954	0.0204822	0.0185429	0.000326518	3.6661e-05	5.22773e-05	16.623	0.0279351	0.00348279	0.042064	0.000391576	0.00557155	7.05617e-05	0.00149312	0.0409571
7504	0.369812	0.065736	0.0203628	0.00252689	0.0223092	9.84574	2.01911	0.197795	0.220887	0.0109976	0.0256086	-0.00180856	0.00332314	0.00105662	-0.00518505	1	15.1113	0.0160627	0.00190922	0.0546278	0.146837	0.0144115	1.08462	15.9401	0.334799	0.0903144	0.0190257	0.000938005	0.00290285	0.0992738	0.047811	0.0460985	0.00667009	0.0116244	0.00566919	0.026926	0.0243174	-4.33519e-06	0.000377137	0.000173022	14.4984	0.0232768	0.00347716	0.0384673	0.000291405	0.00637611	0.00017456	0.00142642	0.0487138
7502	0.363349	0.073163	0.0226121	0.00282729	0.0236017	11.9288	2.09188	0.216901	0.242992	0.0105752	0.0231985	-0.00161729	0.00154018	0.00217403	-0.00448364	1	15.752	0.0185823	0.00255569	0.0555546	0.13949	0.0144159	1.07709	16.5584	0.337144	0.0882193	0.0186051	0.000832685	0.00236993	0.0997571	0.044419	0.0443478	0.0065975	0.012521	0.00608223	0.0277473	0.0249862	0.000660511	0.000664663	6.93392e-05	15.1142	0.0229728	0.00323413	0.0408844	0.000357342	0.0068009	0.00020125	0.00143585	0.0486209
7503	0.363052	0.07142	0.0207375	0.00209891	0.0220113	10.1994	2.14067	0.18804	0.230866	0.0127388	0.0240762	0.000629018	0.00450915	0.00107792	-0.0217122	1	15.8537	0.0171287	0.00242629	0.0457437	0.125178	0.0128977	1.04302	15.0445	0.305465	0.0907827	0.0183804	0.000657603	0.00250468	0.0995664	0.0464984	0.0441023	0.00658299	0.0105449	0.00491323	0.0223745	0.0210787	0.000335577	0.000218064	8.4877e-05	15.5277	0.0213174	0.00282648	0.0325421	0.000252648	0.00530001	0.000145821	0.00122925	0.0463829
7501	0.36027	0.0802781	0.022564	0.00226307	0.0241836	9.92963	2.10746	0.205125	0.273194	0.0129457	0.0252243	-0.00167976	0.00165836	0.00286705	-0.0277445	1	15.3312	0.0176532	0.00196193	0.0502193	0.132556	0.0143447	1.08776	15.4819	0.320824	0.0890015	0.0182877	0.00064897	0.00276767	0.100962	0.0467589	0.0435104	0.00638738	0.011531	0.00573244	0.0227388	0.0233521	0.000406985	-0.000179894	-4.82057e-05	14.7806	0.0225769	0.00296263	0.034368	0.000245233	0.00623141	0.00010333	0.00112922	0.0463
7500	0.355175	0.076407	0.0231943	0.00264123	0.0242204	9.82022	2.11703	0.22212	0.263938	0.0115387	0.0281764	-0.00190509	-1.2917e-05	0.0019876	-0.00656565	1	15.1314	0.0176846	0.00250062	0.0555677	0.144924	0.01507	1.05356	16.5802	0.352361	0.087037	0.0188558	0.000758508	0.00253162	0.100817	0.0465504	0.0430594	0.00666679	0.0116664	0.00600026	0.0270413	0.025878	-0.000198324	8.78768e-05	0.000105394	14.3272	0.0226311	0.00328998	0.0394297	0.000304923	0.00726593	0.000206029	0.00142295	0.0531161
7499	0.353291	0.0752718	0.0261716	0.00315179	0.0243456	12.462	2.37555	0.204621	0.259356	0.0126318	0.0271711	-0.00476713	-0.00197944	0.00157876	-0.0218443	1	15.48	0.0177268	0.00256353	0.0512959	0.141734	0.0142218	1.08494	15.5332	0.335183	0.100385	0.0184144	0.000849889	0.00293708	0.112382	0.0508853	0.0478424	0.00776783	0.0116531	0.00519484	0.0252716	0.0240846	0.000489129	0.000453629	3.60399e-05	15.6084	0.0206278	0.00312354	0.0360051	0.000282019	0.00658052	0.000128332	0.00150121	0.0488346
7506	0.156518	0.125919	0.0324344	0.0029233	0.0248767	15.5588	2.72212	0.231423	0.218584	0.0213968	0.027993	-0.00482072	0.000516615	0.000599445	-0.0322267	1	14.7441	0.0179904	0.00162707	0.0502973	0.185103	0.018419	1.30979	18.6443	0.433304	0.105471	0.024846	0.00141314	0.0027755	0.11874	0.0548679	0.0583763	0.00939243	0.0145901	0.00604349	0.0317492	0.0301845	0.000214734	0.000382653	4.16474e-05	15.0086	0.0186698	0.00234534	0.0332649	0.000226126	0.00785561	0.000628949	0.00274955	0.0601485
7505	0.155416	0.107565	0.0330492	0.00269497	0.0245766	14.1946	2.83931	0.236205	0.2294	0.00600263	0.0280824	-0.0457638	-0.00478224	-0.000390622	-0.0789818	1	15.7467	0.0168601	0.00207224	0.0484623	0.172011	0.0170817	1.30664	18.3449	0.41002	0.112813	0.0264017	0.00190438	0.00315392	0.117219	0.0573652	0.0560423	0.00944377	0.0129041	0.0059383	0.0268286	0.027406	0.000476048	0.000540852	0.000208292	14.7164	0.0176981	0.00221948	0.0283185	0.000290633	0.00682332	0.000708895	0.00327943	0.0548246
7507	0.153344	0.111277	0.0302092	0.0031294	0.0253058	14.6686	2.69095	0.224395	0.195209	0.00796599	0.0314189	-0.0156401	-0.0029976	0.000541029	-0.112294	1	13.9352	0.0172592	0.00226436	0.0543645	0.183548	0.0190982	1.25408	18.9038	0.443025	0.102221	0.0250289	0.00151407	0.00345566	0.116778	0.0542507	0.0535577	0.0083017	0.0144881	0.00644461	0.0320405	0.0307905	-0.000605469	0.00171488	8.36008e-06	13.9987	0.0180834	0.00212987	0.0305584	0.000435536	0.00714255	0.000464923	0.00315085	0.0614846
7513	0.0538571	0.170401	0.0345347	0.00286843	0.0226604	19.2431	3.60042	0.30628	0.296548	0.0669809	0.0391675	-0.00292944	-0.0121281	-0.00139831	-0.037752	1	14.0292	0.0303546	0.00290241	0.0573997	0.253401	0.0241479	1.509	26.9802	1.1864	0.147375	0.0508278	0.015679	0.00407628	0.141446	0.0682009	0.0612273	0.00826779	0.0186987	0.00775171	0.0325426	0.032733	0.00249679	0.000535296	7.9772e-05	12.6743	0.0136599	0.0021388	0.0291109	0.000336001	0.00877573	0.00619949	0.0267284	0.0755614
7510	0.0530555	0.171248	0.0338533	0.00292282	0.0235881	17.0064	3.46605	0.299029	0.320884	0.187	0.0308175	0.00976617	0.0142066	0.00141153	0.139478	1	14.1964	0.0357578	0.00187023	0.0544634	0.242774	0.026032	1.51948	27.583	1.18358	0.146971	0.0520194	0.0178494	0.00470002	0.141138	0.0683218	0.061022	0.00940879	0.0185592	0.00700079	0.032757	0.0334532	-0.00166043	-0.000535205	0.000286889	12.6193	0.0145368	0.00200196	0.0270211	0.000372512	0.00860212	0.00563279	0.0281488	0.081233
7511	0.053023	0.182296	0.0354356	0.0029477	0.024737	19.239	3.36323	0.369866	0.316744	0.0635102	0.0343741	-0.10151	-0.0143723	-0.000184783	0.182855	1	14.1044	0.0401968	0.00266837	0.0614078	0.280616	0.0254345	1.5584	28.7176	1.21032	0.140122	0.0510807	0.0170581	0.00413383	0.135078	0.0652354	0.0590623	0.00926375	0.0179658	0.00755963	0.0358458	0.0363556	-0.00396791	0.000960942	0.000219838	11.6079	0.0148125	0.00207994	0.0310394	0.000432468	0.00988346	0.0059027	0.0251882	0.0783237
7508	0.0240006	0.260357	0.0377247	0.00320584	0.024673	27.2968	4.40033	0.351078	0.384917	0.12548	0.0291948	0.0831073	-0.081341	-0.00568955	-0.671645	1	14.1959	0.110139	0.00192289	0.0473329	0.292323	0.0220874	1.67283	29.4401	4.36421	0.202006	0.0855019	0.092954	0.00436681	0.162007	0.080362	0.0739385	0.00967434	0.0183661	0.00690731	0.0339083	0.0278849	-0.00571139	0.00185355	3.05891e-05	12.1036	0.0100908	0.00132972	0.0208466	0.000330281	0.00921527	0.0175763	0.118811	0.0824327
7509	0.0237506	0.290515	0.0363841	0.0030696	0.0280683	27.487	4.54424	0.346919	0.329382	0.0636092	0.0241868	-0.90656	-0.0441677	0.000764206	0.371278	1	14.8776	0.112589	0.0022718	0.0480936	0.315818	0.0258295	1.77052	29.5963	4.50502	0.200683	0.0856266	0.0981642	0.0034667	0.167768	0.0850745	0.0668175	0.00950492	0.019148	0.00506816	0.0310159	0.0302609	-0.0122058	0.00320008	0.000217929	11.6775	0.00956541	0.00154768	0.0193685	0.00036976	0.00872992	0.0171032	0.11678	0.0855366
[truncated: 43 more columns]
